# Supplementary material for: NO 2 and HCHO measurements in Korea from 2012 to 2016 from Pandora Spectrometer Instruments compared with OMI retrievals and with aircraft measurements during the KORUS-AQ campaign
Source: Copernicus journal article supplement (doi:10.5194/amt-2018-56), 2018-04-03
Supplement: Supplementary file [file amt-2018-56-AC2-supplement.pdf]

Please note the color coding. **Green** was for Referee 1 and **Gray** for referee 2. I used **bold** for replies to referee 2 that are not inserted into the paper.

Interactive comment on “NO<sub>2</sub> and HCHO measurements in Korea from 2012 to 2016 from Pandora Spectrometer Instruments compared with OMI retrievals and with aircraft measurements during the KORUS-AQ campaign” by Jay Herman et al.

Anonymous Referee #2 Received and published: 10 June 2018

**General comments:**

The manuscript entitled “NO<sub>2</sub> and HCHO measurements in Korea from 2012 to 2016 from Pandora Spectrometer Instruments compared with OMI retrievals and with aircraft measurements during the KORUS-AQ campaign” presents total vertical column measurements of NO<sub>2</sub> and HCHO with 9 Pandora instruments at 8 sites during a field campaign in Korea in 2016 (May-June) and from 1 to 5 years before, depending on the station. An investigation of the pollution levels at the 8 different sites, the diurnal pattern of NO<sub>2</sub> and HCHO as well as NO<sub>2</sub> long-term trends are presented.

During the campaign, additional measurements of the NO<sub>2</sub> column using the 4STAR airborne sun photometer and of the altitude profile of HCHO using the air-borne CAMS instrument have been performed, which are compared to the columns measured by the ground-based Pandora instruments. On a longer time series of 1 and 5 years, respectively, a comparison to OMI NO<sub>2</sub> satellite measurements is presented. At last, the Pandora HCHO measurements during the campaign are compared to HCHO measurements from OMI.

The paper highlights nicely the importance and advantages of ground-based measurements with a high temporal resolution for the investigation of local, surface near air pollution in comparison to satellite measurements, which cannot capture the diurnal cycle and tend to underestimate local pollution hotspots due to the large averaging area of the ground pixels.

The paper is well structured and the scientific approach is clearly described. However, the objective and aim of the campaign should be declared more clearly in the text and in some cases the interpretation of the results is lacking.

All in all, I believe this paper is in the scope of AMT and should be published, with some minor improvements, based on answering my specific comments below:

**Specific comments:**

Abstract, line 44: What kind of average is meant by the mentioned “PSI C(NO<sub>2</sub>) averages” and “OMI averages”?

**PSI C(NO<sub>2</sub>) 30-day running averages**

Introduction: Please mention that these are direct sun measurements.

**I added:** “The intent of the network was to integrate **direct-sun** column density observations of NO<sub>2</sub> and HCHO into a multi-perspective framework of observations including ground-based, satellite, and airborne measurements of air quality.”

The objective and aim of the campaign should be declared more clearly in the text. **Done**

Although the cited reference Spinei et al., 2018 discusses the analysis procedure very extensively, please mention in the introduction at least briefly the retrieval algorithm (DOAS?), what kind of reference spectrum is used and how the measured slant columns from the direct sun measurements are converted into vertical columns.

The following has been added

“The retrieval algorithm is based a **direct-sun spectral fitting method similar to the well-accepted DOAS (Differential Optical Absorption Spectroscopy, Platt, et al., 1979 and Platt, 1994 ). NO<sub>2</sub> absorption cross sections were obtained from the laboratory measurements of Vandaele et al., 1998, and HCHO cross sections from Meller and Moortgat (2000). The PSI reference solar spectrum is constructed from a high resolution extraterrestrial spectrum from 270 nm to 1000 nm merged from different sources (Bernhard et al. (2004). Solar spectrum sources are from: Kurucz (2005) normalized to Thuillier et al. (2004), SUSIM/Atlas-3 spectrum (VanHoosier et al., 1996), and the spectrum from Gueymard (2004). One of the advantages of using direct-sun observations is the accurate conversion to vertical column based on a geometric calculation of the slant path air mass factor AMF for a known solar zenith angle SZA is with a slight correction to the function Secant(SZA) (Herman et al., 2009 eqn. 3). A complete description of the retrieval algorithms and PSI operations are given in the PSI software manual (Cede, 2017). Accuracy in the DOAS-type retrieval is obtained using careful measurements of the spectrometer’s slit function, wavelength calibration, knowledge of atmospheric absorption cross sections, and the solar spectrum at the top of the atmosphere. Accuracy for C(NO<sub>2</sub>) has been estimated to be ±0.05 DU. A recent addition of anti-reflection coatings to the PSI optics has improved accuracy and precision by reducing the residuals associated with spectral fitting using trace gas absorption cross sections. The reduced residuals are necessary for the retrieval of formaldehyde and bromine oxide that absorb in spectral regions dominated by ozone and NO<sub>2</sub>. Other DOAS-type measurements have been made in Korea based on observations of sky radiance ratios (e.g., Multi Axis MAX-DOAS: Kanaya, et al., 2014) and direct-sun DOAS using a PSI in Seoul, Korea (Park et al., 2018).”**

Since it is mentioned later on in Section 2 for the measurements in Anmyeondo, please discuss briefly the contribution of the stratosphere to the presented total vertical columns.

How large is the contribution and does it change over the day? Can stratosphere and troposphere be separated?

The measurement from the PSI is for total column (stratosphere + troposphere). For  $\text{NO}_2$ , the stratospheric contribution is approximately 0.1 DU and it does change during the day by about 0.05 DU. The direct sun measurement does not permit separation of troposphere and stratosphere

A sentence was added, "Of these sites, Anmyeondo frequently (40%) retrieves values of  $\text{C}(\text{NO}_2)$  that are close to the typical stratospheric values of  $0.1 \pm 0.05$  DU. Other sites occasionally have clean days with similar low values."

Please mention briefly what other work on ground-based (DOAS type) Korean/Asian air pollution measurements has been published in other studies in the past to put the aim of the campaign/study into context.

There are other DOAS measurements, but they are all MAX-DOAS, which are quite different than direct sun. I added a brief comment, "Other DOAS-type measurements have been made in Korea based on observations of sky radiance ratios (e.g., Multi Axis MAX-DOAS: Kanaya, et al., 2014) and direct-sun DOAS using a PSI in Seoul, Korea (Park et al., 2018)."

Fig. 2a, page 5: The agreement between the instruments is quite impressive. But what happened at 17:30-18:00 local time? Are these real differences or has the Pan27 instrument some missing data gaps and the connected data points convey a wrong impression?

These are differences caused by low signal from increasing cloud cover that affects the retrieval algorithm. There are small differences between instruments that introduce different amounts of noise in the signal for small signals.

Section 2, line 195f, page 8: See comment on stratospheric contribution above.

The most frequently occurring  $\text{C}(\text{NO}_2)$  value at Anmyeondo is 0.15 – 0.2 DU, which means that the measured  $\text{NO}_2$  amount are partly from the stratosphere ( $0.1 \pm 0.05$  DU) with very little tropospheric or boundary layer  $\text{NO}_2$ . There are occasional  $\text{C}(\text{NO}_2)$  plumes that could be from industrial activity to the north, and, perhaps, from China. Transport of  $\text{NO}_2$  from China occurs episodically in significant amounts (Lee et al., 2014).

Section 3: Please explain in more detail why the observed  $\text{NO}_2$  daily patterns fit so well to automobile and power generation emissions.

The pattern measured by PSI in Korea during the spring KORUS-AQ campaign differed from other non-Korean locations in that there usually a weaker morning peak in Korea compared to the afternoon. The strong afternoon peak does not occur every day, but is often enough to be notable. The meteorological effects certainly play a role, but at this time the appropriate model studies are not available.

In many of the studies on the NO<sub>2</sub> diurnal cycle in polluted urban regions two NO<sub>2</sub> peaks in the morning and afternoon are observed corresponding to the morning and afternoon traffic rush hour. Do you have an explanation why the morning rush hour is hardly visible in the presented measurements and why the afternoon peak is so pronounced? Do you also observe a weekly cycle in your NO<sub>2</sub> measurements, like it has been observed in polluted regions and discussed for example in Beirle et al. (GRL, 2003) or Ialongo et al. (AMT, 2016)?

**Yes, there is a weekly cycle in that Sundays usually have less pollution than Wednesdays.**

Section 4: About the seasonal cycles: Please discuss briefly why the seasonal cycle of NO<sub>2</sub> has its minimum in August/September and its maximum in winter/early spring. Is there more heating during winter times in Korea or is it just due to less OH radicals because of less light in winter?

**Winter in Korea is complicated with quite a bit of cloud cover and precipitation. This certainly would affect the chemistry. Plus the cold winter weather certainly increases the amount of energy used, which produces more NO<sub>2</sub>. Since I did not do the model studies, I preferred to just leave the data without a “hand waving” explanation.**

Section 4, line 291, page 13: The “strong effect on local air quality” is an improvement of local air quality, right?

**The strong effect on local air quality mentioned in the paragraph concerns large amounts of total column NO<sub>2</sub>, most of which is near the surface. This probably makes the air quality worse.**

Section 6, line 531f, page 27: What is the reason for this seasonal increase during May and June?

**Unfortunately, there are no long term measurements of C(HCHO), so there is no way of determining if the increase is from sources or VOC chemistry. The PSI was not capable of measuring HCHO prior to late 2016.**

**Technical corrections:**

Line 43, page 2: please add “local time” or LT

Added: “OMI overpass local times (LT =  $13.5 \pm 0.5$  hours).”

Line 48, page 2: please enclose “FOV” in brackets **OK**

Tab. 1: The degree symbol is missing for latitude and longitude values **OK**

Line 229, page 10: Please round off the values for H<sub>2</sub>O and CO<sub>2</sub>. Six significant(?) digits are unnecessary here, since this paragraph is only about getting a general impression on the order of magnitude of the emissions from automobiles. **OK** “containing H<sub>2</sub>O (144 ppm) and CO<sub>2</sub> (122 ppm)”.

Fig. 6: Between Panel A and Panel B the x axis tick labels A, M, J and J (April, May, June, July) are missing.

Fixed

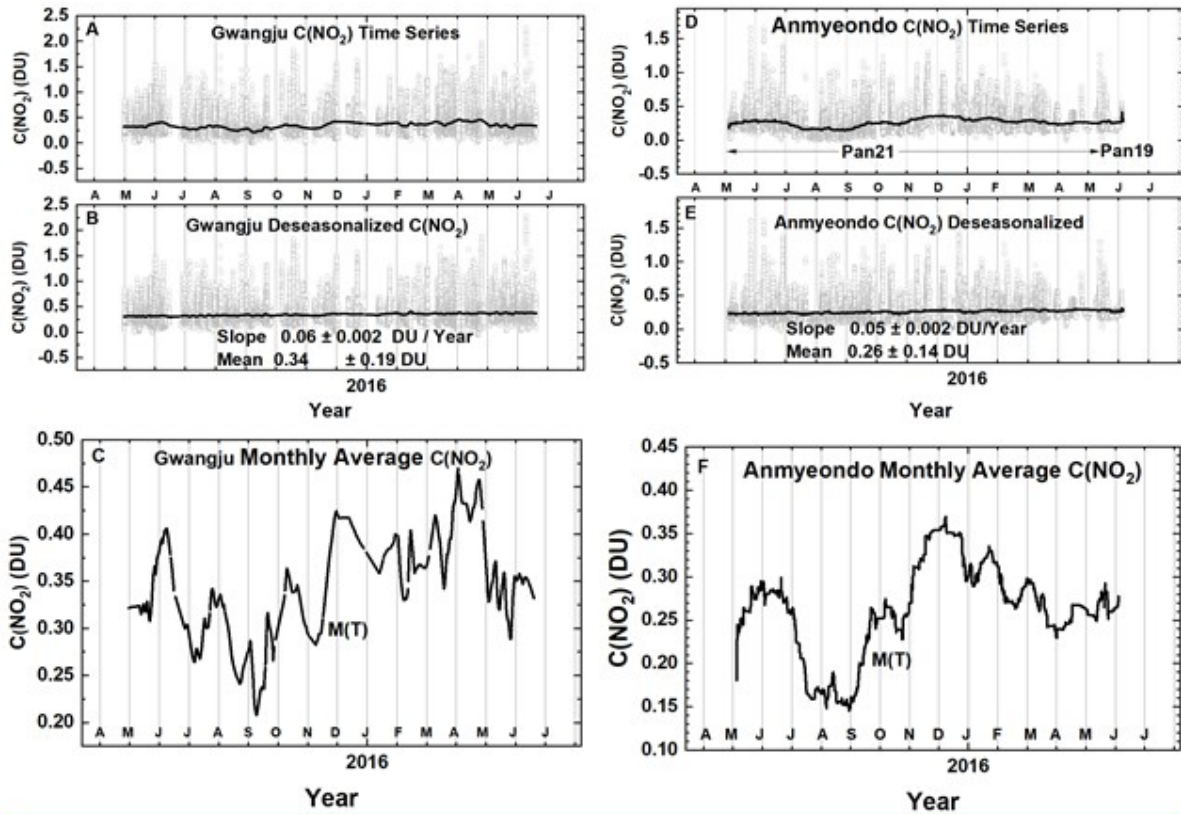

Line 298, page 13: please add “local time” or LT Fig. 9a: Seoul (left panel): Why does the 3-month average (solid lines) show values where around 6 month of data are missing? Or is it just a linear interpolation between the values before and after the gap?

**Missing data are represented by linear interpolation in the plots, but not any analysis. I have added a statement in the caption.** “Fig. 9a Comparisons between the daily values of C(NO<sub>2</sub>) for OMI (black) and PSI (red) at Seoul and Busan for a 5-year period. Solid lines show the average seasonal variation (Lowess(0.1)), see also Fig. 9b. **Linear interpolation is used where there are missing data points.**”

Line 429, page 19 and Fig. 14: The numbers in “Integ(0.026, 7.2)” are given in kilometers?

**Yes. Added:** “Integ(0.026, 7.2 km)”

Tab. 2.: "PSI HCHO" is missing the "DU" (like in "DC8 HCHO DU")

Table 2 is now

Table 2 Taehwa Mtn DC8 compared to PSI measurements (see 10 Jun in Fig. 18)

| Date   | LT       | DC8 HCHO DU | PSI HCHO (DU) | Percent |
|--------|----------|-------------|---------------|---------|
| 11 May | 08:25:19 | 0.4         | 0.6           | 67      |
| 18 May | 08:34:26 | 0.4         | 0.5           | 80      |
| 30 May | 12:05:00 | 0.5         | 0.9           | 56      |
| 10 Jun | 08:22:45 | 1           | 1.16          | 86      |
| 10 Jun | 12:22:53 | 1           | 1.5           | 67      |
| 10 Jun | 15:46:03 | 1           | 1.3           | 77      |

Line 545, page 29: "... very high amounts of urban pollution from NO<sub>2</sub> and HCHO \*, and more moderate, but still high values, away from the urban centers." \*close to the urban centers

**Changed to ,** " but still high values in Mt Taewha and Yeogju, which are some distance from the major urban centers, . An exceptional location was Amnyeondo"

1 **NO<sub>2</sub> and HCHO measurements in Korea from 2012 to 2016 from Pandora Spectrometer Instruments**  
2 **compared with OMI retrievals and with aircraft measurements during the KORUS-AQ campaign**

3 **Jay Herman<sup>1</sup>, Elena Spinei<sup>2</sup>, Alan Fried<sup>3</sup>, Jhoon Kim<sup>4</sup>, Jae Kim<sup>5</sup>, Woogyung Kim<sup>3</sup>, Alexander Cede<sup>6</sup>, Nader**  
4 **Abuhassan<sup>1</sup>, Michal Segal-Rozenhaimer<sup>7,8</sup>**

5

6

7

8

9

10

11

12

13

14

15

16

17

18 **Correspondence email: [jay.r.herman@nasa.gov](mailto:jay.r.herman@nasa.gov)**

19 **<sup>1</sup>University of Maryland Baltimore County JCET**

20 **<sup>2</sup>Virginia Polytechnic Institute and State University, Blacksburg, VA 24061, USA**

21 **<sup>3</sup>Institute of Arctic & Alpine Research, University of Colorado, Boulder, Colorado**

22 **<sup>4</sup>Dept. of Atmospheric Sciences, Yonsei University, Seoul Korea**

23 **<sup>5</sup>Department of Atmospheric Science, Pusan University, Busan, Korea**

24 **<sup>6</sup>Goddard Earth Sciences Technology & Research (GESTAR) Columbia, Columbia, MD 21046, USA**

25 **<sup>7</sup>Earth Science Division, NASA Ames, Mountain View, California**

26 **<sup>8</sup>Bay Area Environmental Research Institute, Petaluma, California**

27

28

29 **NO<sub>2</sub> and HCHO measurements in Korea from 2012 to 2016 from Pandora Spectrometer Instruments**  
30 **compared with OMI retrievals and with aircraft measurements during the KORUS-AQ campaign**

31  
32 **Abstract**

33  
34 Nine Pandora Spectrometer Instruments (PSI) were installed at 8 sites in South Korea as part of  
35 the KORUS-AQ (Korea U.S.-Air Quality) field study integrating information from ground, aircraft,  
36 and satellite measurements for validation of remote sensing air-quality studies. The PSI made  
37 direct-sun measurements of total vertical column NO<sub>2</sub>, C(NO<sub>2</sub>), with high precision (0.05 DU,  
38 where 1DU = 2.69x10<sup>16</sup> molecules/cm<sup>2</sup>) and accuracy (0.1 DU) that were retrieved using  
39 spectral fitting techniques. Retrieval of Formaldehyde (HCHO) total column amounts were also  
40 obtained at five sites using the recently improved PSI optics. The HCHO retrievals have with  
41 high precision, but possibly lower accuracy than for NO<sub>2</sub> because of uncertainty about the  
42 optimum spectral window for all ground-based and satellite instruments. PSI direct-sun  
43 retrieved values of C(NO<sub>2</sub>) and C(HCHO) are always significantly larger than OMI (AURA satellite  
44 Ozone Monitoring Instrument) retrieved C(NO<sub>2</sub>) and C(HCHO) for the OMI overpass local times  
45 (LT = 13.5 ± 0.5 hours). In urban areas, PSI C(NO<sub>2</sub>) 30-day running averages are at least a factor  
46 of two larger than OMI averages. Similar differences are seen for C(HCHO) in Seoul and nearby  
47 surrounding areas. Late afternoon values of C(HCHO) measured by PSI are even larger, implying  
48 that OMI early afternoon measurements underestimate the effect of poor air quality on human  
49 health. The primary cause of the OMI underestimate is the large OMI field of view (FOV) that  
50 includes regions containing low values of pollutants. In relatively clean areas, PSI and OMI are  
51 more closely in agreement. C(HCHO) amounts were obtained for five sites, Yonsei University in  
52 Seoul, Olympic Park, Taehwa Mtn., Amnyeondo, and Yeosu. Of these the largest amounts of  
53 C(HCHO) were observed at Olympic Park and Taehwa Mountain, surrounded by significant  
54 amounts of vegetation. Comparisons of PSI C(HCHO) results were made with the Compact  
55 Atmospheric Multispecies Spectrometer CAMS during overflights on the DC-8 aircraft for  
56 Taehwa Mtn and Olympic Park. In all cases, PSI measured substantially more C(HCHO) than  
57 obtained from integrating the CAMS altitude profiles. PSI C(HCHO) at Yonsei University in Seoul  
58 frequently reached 0.6 DU and occasionally exceeded 1.5DU. The semi-rural site, Mt. Taehwa,  
59 frequently reached 0.9 DU and occasionally exceeded 1.5DU. Even at the cleanest site,  
60 Amnyeondo, HCHO occasionally exceeded 1 DU.

61  
62 Keywords: Pandora, KORUS-AQ, NO<sub>2</sub>, HCHO, Formaldehyde, Korea

63



64 **1 Introduction**

65 The purpose of this paper is to present the retrieved amounts of nitrogen dioxide and  
66 formaldehyde, NO<sub>2</sub> and HCHO, obtained from Pandora Spectrometer instruments (PSI) direct-sun  
67 observations during the KORUS-AQ campaign (Korea US Air Quality: May – June 2016). Quoting from a  
68 NASA website: “Korea U.S.-Air Quality (KORUS-AQ) is a joint field study between NASA and the Republic  
69 of Korea to advance the ability to monitor air pollution from space. The campaign will assess air quality  
70 across urban, rural and coastal South Korea using observations from aircraft, ground sites, ships and  
71 satellites to test air quality models and remote sensing methods. Findings will help develop observing  
72 systems using models and data to improve air quality assessments for decision makers.” A thorough  
73 description of the KORUS-AQ campaign and its motivations is given in a pre-campaign white paper,  
74 [https://espo.nasa.gov/korus-aq/content/KORUS-AQ\\_White\\_Paper](https://espo.nasa.gov/korus-aq/content/KORUS-AQ_White_Paper).

75 Assessing air quality in South Korea is of interest because of the levels of pollution arising from  
76 high densities of population and intense industrial activity associated with the production of NO<sub>2</sub>.  
77 Recent measurements of surface concentrations of NO<sub>2</sub> and comparisons with satellite data  
78 demonstrate the need for high quality ground-based measurements to augment satellite observations  
79 (Kim et al., 2017; Jung et al., 2017). The driving reason behind the interest is the effect of elevated levels  
80 of NO<sub>2</sub> in Korea on human health (Kim and Song, 2017 and references therein). Measurements of N O<sub>2</sub>  
81 from aircraft have been used to obtain altitude profiles to compare with data obtained from fixed site  
82 measurements and to obtain a national scale  
83 estimate of pollutant exposure (Lee et al., 2015;  
84 Kim and Song, 2017).

85 In addition to NO<sub>2</sub>, PSI measurements  
86 were used to assess the amount of Formaldehyde  
87 (HCHO) present in the air. This is important  
88 because of HCHO potential impact on health  
89 (Zhang et al., 2013, ) and because it plays a strong  
90 role in tropospheric reactions leading to the  
91 formation of boundary layer ozone. Sources of  
92 HCHO are from atmospheric reactions with  
93 volatile organic compounds (VOC) emitted from  
94 ground sources and industrial activities (Lee at al.,  
95 2009). A previous paper describes HCHO  
96 retrievals from a PSI located at Yonsei University  
97 in Seoul using a similar spectral fitting retrieval  
98 algorithm used in the current study (Park et al.,  
99 2018), but using a different wavelength fitting  
100 range, 335 – 358 nm instead of 332 – 359 nm  
101 used in this study. The choice of spectral fitting  
102 window is discussed in Spinei et al. (2018).

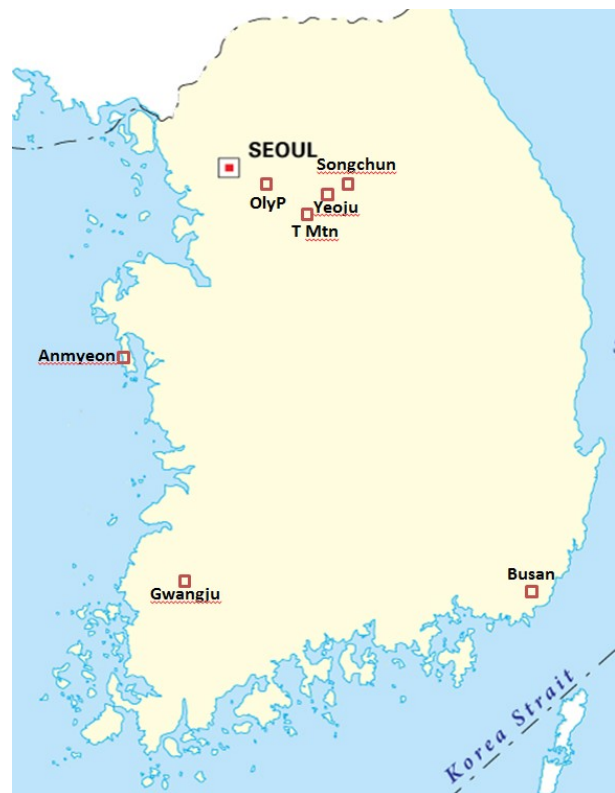

Fig. 1 KORUS-AQ sites for 9 Pandora instruments at 8 sites.

103 As part of the KORUS-AQ campaign, a network of nine PSI was installed in Korea at 8 locations  
 104 (Fig. 1 and Table 1). Five of the sites were selected to be “down-wind” from Seoul, an extremely NO<sub>2</sub>  
 105 polluted area. The intent of the network was to integrate **direct-sun** column density observations of  
 106 NO<sub>2</sub> and HCHO into a multi-perspective framework of observations including ground-based, satellite,  
 107 and airborne measurements of air quality. Viewing air quality through these multiple perspectives is  
 108 important for connecting observations from future geostationary satellites to air quality networks such  
 109 that conditions both at the surface and aloft can be better understood and represented across  
 110 unmonitored areas. The data are especially important for computer models used for forecasts and  
 111 decision making. Five of the KORUS-AQ PSI had recently improved optics that permitted retrieval of total  
 112 vertical column formaldehyde (C(HCHO)). Part of the network was installed in April 2015, a year before  
 113 the start of the campaign. Three PSI continue to operate in Korea, one each, in Busan and Seoul since  
 114 2012, and one in Gwangju operating since April 2015.

115  
 116 Measurements of daytime total columns in Dobson Units, where 1 DU = 2.69 x 10<sup>16</sup>  
 117 molecules/cm<sup>2</sup>, C(NO<sub>2</sub>), C(O<sub>3</sub>) and C(HCHO) are obtained every 80 seconds, which enables the PSI to  
 118 show rapid short term (minutes to hours) variations in most locations with significant pollution (e.g.,  
 119 C(NO<sub>2</sub>) > 0.2 DU). PSI measurements of the visible and UV wavelengths are obtained separately (40  
 120 seconds each). A visible wavelength blocking filter, U340, reduces stray light for UV measurements.

121

Table 1 KORUS-AQ Locations (South to North)

| Locations    | Alt(m) | Latitude               | Longitude               |
|--------------|--------|------------------------|-------------------------|
| Gwangju      | 33     | 35.2260 <sup>o</sup> N | 126.8430 <sup>o</sup> W |
| Busan        | 228    | 35.2353 <sup>o</sup> N | 129.0825 <sup>o</sup> W |
| Anmyeondo    | 41     | 36.5380 <sup>o</sup> N | 126.3300 <sup>o</sup> W |
| Taehwa Mtn   | 160    | 37.3123 <sup>o</sup> N | 127.3106 <sup>o</sup> W |
| Yeoju-1 & 2  | 90     | 37.3385 <sup>o</sup> N | 127.4895 <sup>o</sup> W |
| Songchon     | 49     | 37.4100 <sup>o</sup> N | 127.5600 <sup>o</sup> W |
| Olympic Park | 26     | 37.5232 <sup>o</sup> N | 127.1260 <sup>o</sup> W |
| Seoul        | 181    | 37.5644 <sup>o</sup> N | 126.9340 <sup>o</sup> W |

122

123 Details on the Pandora spectrometer instrument can be found in Herman et al., (2009 and 2015)  
 124 as well as a NASA Pandora website  
 125 [https://avdc.gsfc.nasa.gov/pub/DSCOVER/Pandora/Web\\_Pandora/index.html](https://avdc.gsfc.nasa.gov/pub/DSCOVER/Pandora/Web_Pandora/index.html) and the data used are  
 126 available from <https://avdc.gsfc.nasa.gov/pub/DSCOVER/Pandora/DATA/KORUS-AQ/>

127

128 The PSI consists of a small Avantes low stray light spectrometer (280 – 525 nm with 0.6 nm  
 129 spectral resolution with 4 times oversampling) connected to an optical head by a 400 micron single  
 130 strand fiber optic cable. The spectrometer is temperature stabilized at 20<sup>o</sup>C (68<sup>o</sup>F) inside of a weather  
 131 resistant container. The optical head consists of a collimator and lens giving rise to a 1.6<sup>o</sup> FOV (field of  
 132 view) FWHM (Full Width Half Maximum) with light passing through two filter wheels containing  
 133 diffusers, a UV340 filter (blocks visible light), neutral density filters, and an opaque position (dark  
 134 current measurement). When the diffuser is used, the FOV is increased to over 2<sup>o</sup>. The optical head is

135 connected to a small suntracker capable of accurately following the sun's center using software running  
136 on a small computer-data logger contained in a weatherproof outer box along with the spectrometer in  
137 a second inner temperature controlled box. The PSI is capable of obtaining C(NO<sub>2</sub>), C(HCHO) and C(O<sub>3</sub>)  
138 amounts sequentially over a period of 80 seconds including two dark current determinations. The  
139 integration time for NO<sub>2</sub> in bright sun is about 4 milli-seconds that is repeated and averaged for 20  
140 seconds (up to 4000 measurements) to obtain very high signal to noise ratios and very high precision  
141 (precision < 0.01 DU). Similar comments apply to C(O<sub>3</sub>), but not to C(HCHO), since formaldehyde  
142 absorption spectrum is mixed in with absorption from NO<sub>2</sub> and O<sub>3</sub>. This causes cross-correlation effects  
143 in the retrieval algorithm that make C(HCHO) retrievals sensitive to the selection of the wavelength  
144 range. The main source of noise in the measurement comes from the presence of clouds or haze in the  
145 FOV, which increases the exposure time and reduces the number of measurements in 20 seconds.

146  
147 The retrieval algorithm is based a direct-sun spectral fitting method similar to the well-accepted  
148 DOAS (Differential Optical Absorption Spectroscopy, Platt, et al., 1979 and Platt, 1994 ). NO<sub>2</sub> absorption  
149 cross sections were obtained from the laboratory measurements of Vandaele et al., 1998, and HCHO  
150 cross sections from Meller and Moortgat (2000). The PSI reference solar spectrum is constructed from a  
151 high resolution extraterrestrial spectrum from 270 nm to 1000 nm merged from different sources  
152 (Bernhard et al. (2004). Solar spectrum sources are from: Kurucz (2005) normalized to Thuillier et al.  
153 (2004), SUSIM/Atlas-3 spectrum (VanHoosier et al., 1996), and the spectrum from Gueymard (2004).  
154 One of the advantages of using direct-sun observations is the accurate conversion to vertical column  
155 based on a geometric calculation of the slant path air mass factor AMF for a known solar zenith angle  
156 SZA is with a slight correction to the function Secant(SZA) (Herman et al., 2009 eqn. 3). A complete  
157 description of the retrieval algorithms and PSI operations are given in the PSI software manual (Cede,  
158 2017). Accuracy in the DOAS-type retrieval is obtained using careful measurements of the  
159 spectrometer's slit function, wavelength calibration, knowledge of atmospheric absorption cross  
160 sections, and the solar spectrum at the top of the atmosphere. Accuracy for C(NO<sub>2</sub>) has been estimated  
161 to be ±0.05 DU. A recent addition of anti-reflection coatings to the PSI optics has improved accuracy and  
162 precision by reducing the residuals associated with spectral fitting using trace gas absorption cross  
163 sections. The reduced residuals are necessary for the retrieval of formaldehyde and bromine oxide that  
164 absorb in spectral regions dominated by ozone and NO<sub>2</sub>. Other DOAS-type measurements have been  
165 made in Korea based on observations of sky radiance ratios (e.g., Multi Axis MAX-DOAS: Kanaya, et al.,  
166 2014) and direct-sun DOAS using a PSI in Seoul, Korea (Park et al., 2018).

167  
168 This paper discusses the distribution of C(NO<sub>2</sub>) and C(HCHO) over Korea at the sites where the  
169 PSI were located (Fig. 1). Section 2 shows the amounts of NO<sub>2</sub> observed by PSIs at the 8 KORUS-AQ  
170 sites. Section 3 discusses the diurnal variation of NO<sub>2</sub>. Section 4 looks at longer term changes in NO<sub>2</sub>  
171 obtained from PSIs that were deployed before the beginning of the KORUS-AQ campaign. Section 5  
172 evaluates the disagreement with **Ozone Monitoring Instrument** (OMI) satellite C(NO<sub>2</sub>) retrievals (Kramer  
173 et al., 2008). Section 6 compared PSI C(NO<sub>2</sub>) retrievals with the aircraft overpass retrievals from the  
174 4STAR instrument (Segal-Rozenhaimer et al., 2014). Section 6 discusses retrievals of C(HCHO) amounts  
175 for five PSI sites, the diurnal variation of C(HCHO), and comparisons with the Compact Atmospheric  
176 Multispecies Spectrometer CAMS (Richter et al., 2015) from DC-8 aircraft overflights of 5 PSI sites.

177  
178

## 179 2 NO<sub>2</sub> during the KORUS-AQ Campaign (May – June 2016)

180 An example of NO<sub>2</sub> retrieval from two independently calibrated Pandoras that were initially  
181 located at the same site (Yeosu, Korea, 37.3385°N, 127.4895°W) are compared in Fig. 2a showing that  
182 the difference in C(NO<sub>2</sub>) amount is less than 0.05 DU even in the presence of thin afternoon clouds (Fig.  
183 2b) that decrease the measured solar irradiance by more than a factor of 2. Though Yeosu is a relatively  
184 clean site in Korea (located to the southeast of Seoul Lat=37.5644°N, Long=126.934°W), C(NO<sub>2</sub>) amounts  
185 frequently reach moderately high values (e.g., 1 DU on 3 June 2016), and occasionally even higher (2-3  
186 DU). However, Yeosu has much less C(NO<sub>2</sub>) compared to Seoul, less than 30 km distant, where PSI  
187 measurements were found to reach over 3 DU (Fig. 3) during the campaign period from mid-April to  
188 early June, 2016. Typical C(NO<sub>2</sub>) amounts are 0.3 to 0.5 DU in polluted regions.

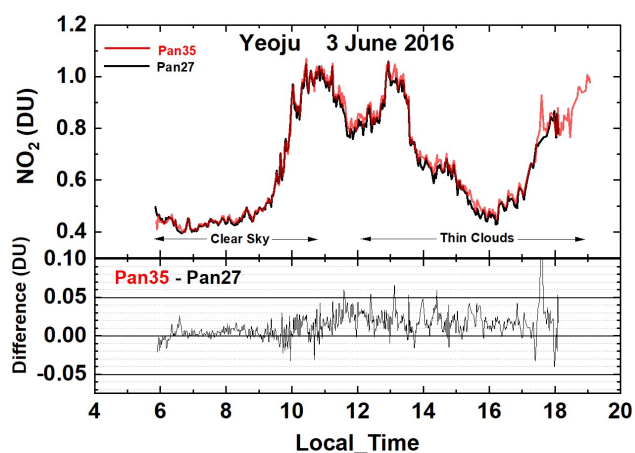

Fig. 2a C(NO<sub>2</sub>) amounts from Pandora 27 and 35 in Yeosu, Korea during 3 June 2016 and their difference |Pan35 – Pan27| < 0.05 DU.

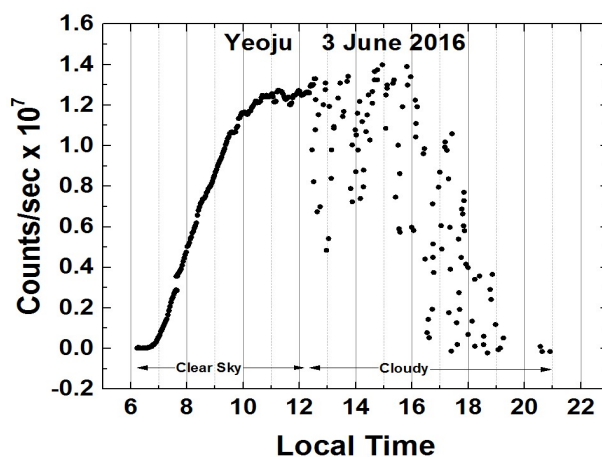

Fig. 2b Pandora 35 estimate of cloud or aerosol reduced measured counts/second at approximately 500 nm.

189 In a manner similar to Fig. 2a, C(NO<sub>2</sub>) amounts can show large variability from day-to-day and  
190 intraday, as well as between different sites. The largest amounts of C(NO<sub>2</sub>) are in the north (Seoul and  
191 Olympic Park) associated with the largest population and industry concentrations, while the southern  
192 cities of Busan and Gwangju have smaller amounts of C(NO<sub>2</sub>). The smallest C(NO<sub>2</sub>) amounts are at  
193 Anmyeondo (an island on west coast of Korea 42 km south of Seoul, usually not downwind of Seoul),  
194 and Songchon to the east of Seoul.

195  
196 Figure 2b shows the effect of thin clouds in terms of reduced measured count rates for a single  
197 spectrometer pixel near 500 nm showing a near noon count rate of 1.26 x 10<sup>7</sup> counts/second followed  
198 by a reduced count rate as clouds move in front of the sun. The cloud plus aerosol cover estimate is  
199 from the same date 3 June 2016 as the C(NO<sub>2</sub>) amounts shown in Fig.2a. The effect of thin clouds for  
200 C(NO<sub>2</sub>) retrieval (Fig. 2a) is increased noise (reduced precision) with a very small impact on accuracy.  
201 There are two effects on PSI observations to consider in association with thin clouds. First, is multiple

202 scattering within the cloud affecting the optical path and effective air mass factor AMF. This has a very  
203 small effect on AMF, since most of the NO<sub>2</sub> is near the surface well below the clouds. Second, is the  
204 reduction in the number of measurements during a fixed 20 second measuring period causing a  
205 decrease in the signal to noise ratio. The weather during the campaign was occasionally very cloudy,  
206 which caused some missing NO<sub>2</sub> and O<sub>3</sub> data. However, most of the cloudy days were light to moderate  
207 cloud cover, which permitted C(NO<sub>2</sub>) amounts to be determined, but with lower precision compared to  
208 clear-sky direct sun measurements (e.g., Fig.s 2a and b). When the cloud cover becomes sufficiently  
209 thick, precision is reduced (increased point-to-point scatter) and the spectral fitting error increases. A  
210 small percentage of data points with high retrieval error, C(NO<sub>2</sub> Error) > 0.1 DU, have been removed  
211 from the data set.

212

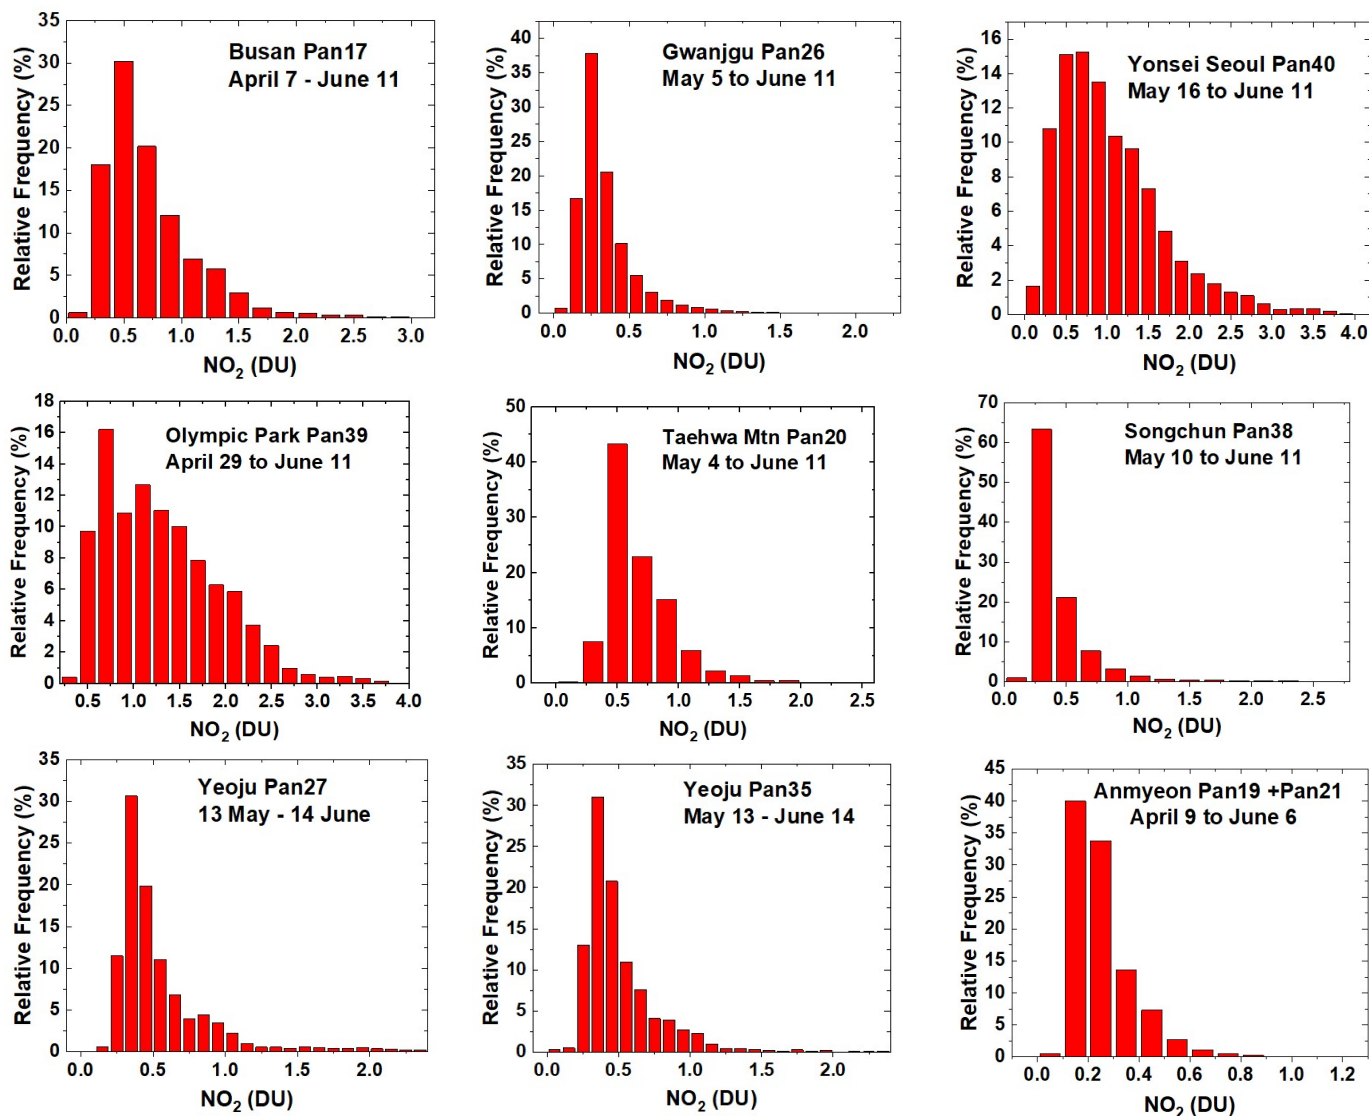

Fig. 3. Frequency distributions of  $C(\text{NO}_2)$  across the KORUS-AQ PSI network: April 20 to Jun 6 2016, except as labelled. The axes vary for different sites.

213  
214  
215  
216  
217  
218  
219  
220  
221

Figures 3 and 4 summarize all of the Pandora  $C(\text{NO}_2)$  data obtained during the KORUS-AQ campaign. Figure 3 presents histograms in percent frequency of occurrence for all nine sites. All of the sites located within or downwind of major cities have production of  $\text{NO}_x$  mainly from transportation and power generation as its major sources. The ratio of transportation  $\text{NO}_x$  production compared to all other sources is estimated as up to a factor of three (Kim et al., 2013). Of these sites, Anmyeondo frequently (40%) retrieves values of  $C(\text{NO}_2)$  that are close to the typical stratospheric values of  $0.1 \pm 0.05$  DU. Other sites occasionally have clean days with similar low values.

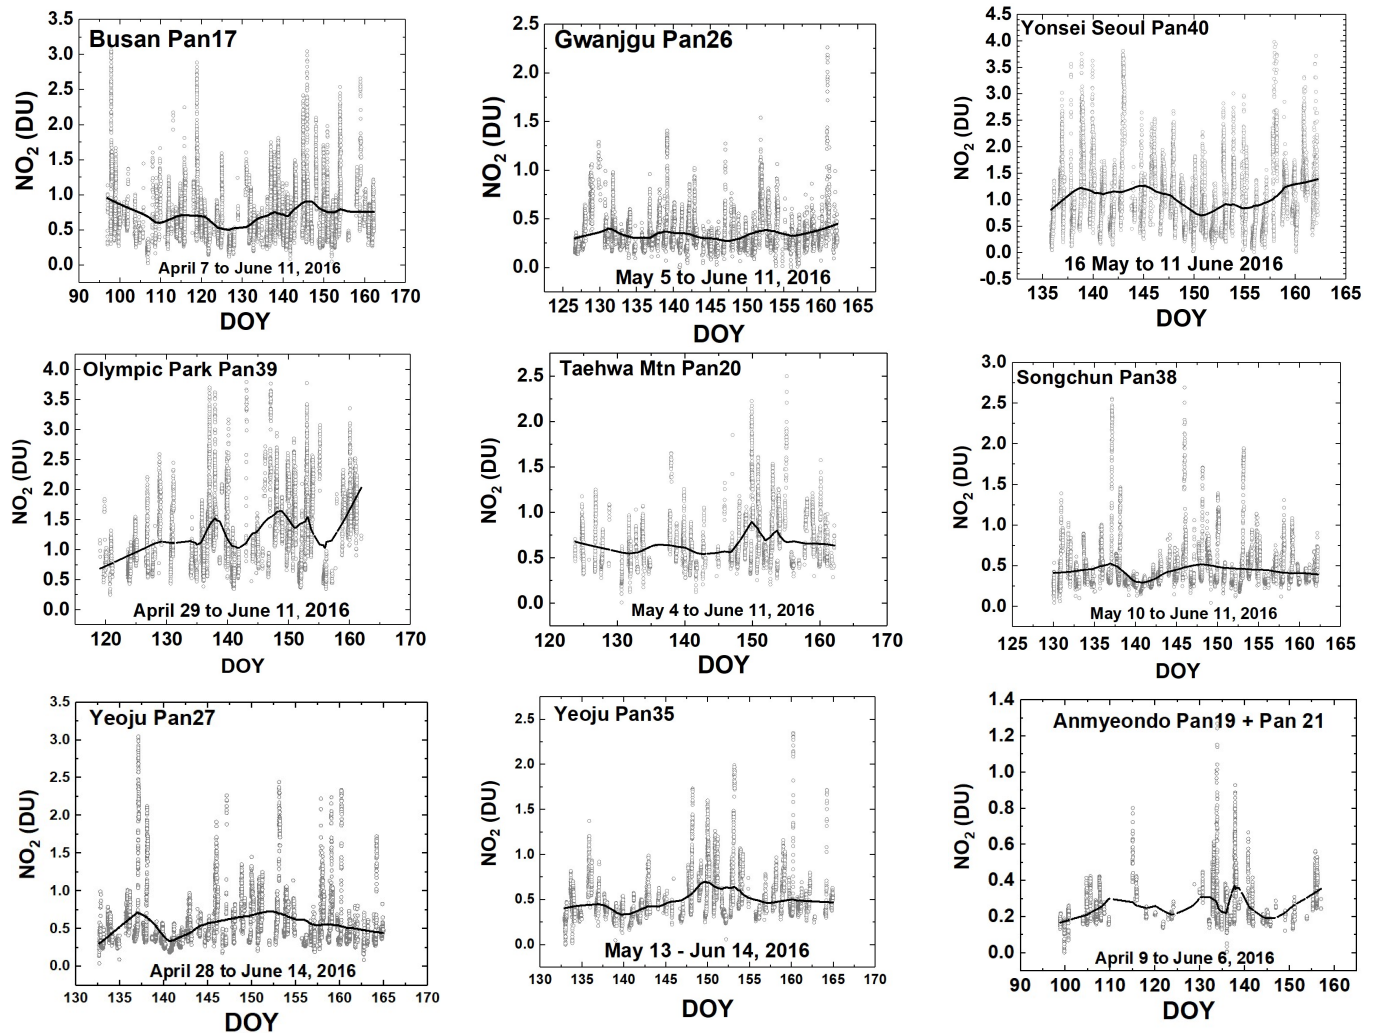

Fig. 4 NO<sub>2</sub> time series vs day of the year (DOY) and diurnal variability (daily vertical extent) at 9 Pandora sites. Notice the very high NO<sub>2</sub> amounts in Seoul and nearby Olympic Park. The black curves are approximately weekly least squares running averages. The daily vertical extent corresponds to diurnal variation (Fig. 2). Note: the vertical scales are different for each site to show the daily variability relative to the running average.

222

223 The Seoul site frequently has amounts of C(NO<sub>2</sub>) greater than 2 DU. The same is true of Olympic  
 224 Park, located in the eastern part of the Seoul metropolitan area. For locations increasingly distant from  
 225 Seoul, the amount of C(NO<sub>2</sub>) decreases in response to smaller local emissions, since the short chemical  
 226 lifetime of NO<sub>2</sub> normally precludes long distance transport. Compared to Seoul, the two smaller  
 227 southern cities, Gwangju and Busan, have relatively low levels of C(NO<sub>2</sub>) on most days, with the most  
 228 typical values ranging from 0.3 to 0.5 DU, although high values exceeding 2 DU can occur on rare  
 229 occasion.

230

231 Figure 4 shows the same data as Fig. 3, but in the form of a time series covering the KORUS-AQ  
 232 period. The daily variation (at least one point every two minutes) is shown in the vertical extent  
 233 corresponding to each day's data. Figures 3 and 4 show that sites near Seoul metropolitan (Olympic  
 234 Park) area have larger amounts of pollution compared to those further away (Taehwa, Songchon, and

235 **Yeosu**. Even though average  $C(\text{NO}_2)$  amounts are much lower at Songchon and Yeosu, there are times  
236 when the pollution levels are quite high ( $C(\text{NO}_2) > 2$  DU, **Figs. 4 and 5**). There are days when the amount  
237 of  $C(\text{NO}_2)$  gets close to 4 DU in Seoul, 3 DU in Olympic Park and Busan, and 4 DU for one day in Yeosu  
238 (April 27). The southern cities, Busan and Gwangju are much less polluted on average, which results in a  
239 much smaller effect on adjacent regions. **Busan is located on the southeastern coastline, so that some of**  
240 **its  $\text{NO}_2$  pollution dissipates over the ocean, except for occasional days when very high amounts (3 DU)**  
241 **occur.** Anmyeondo is quite clean, since it is located on the western coast well south of Seoul. **The most**  
242 **frequently occurring  $C(\text{NO}_2)$  value at Anmyeondo is 0.15 – 0.2 DU, which means that the measured  $\text{NO}_2$**   
243 **amount are partly from the stratosphere ( $0.1 \pm 0.05$  DU) with very little tropospheric or boundary layer**  
244  **$\text{NO}_2$ . There are occasional  $C(\text{NO}_2)$  plumes that could be from industrial activity to the north, and,**  
245 **perhaps, from China. Transport of  $\text{NO}_2$  from China occurs episodically in significant amounts (Lee et al.,**  
246 **2014).**

247

### 248 **3 Diurnal Variation of $C(\text{NO}_2)$**

249

250 Grouping the diurnal variation together from multiple days (Fig. 5) reveals a pattern to  $\text{NO}_2$   
251 emissions and accumulation related to the main  $\text{NO}_2$  emission sources (automobiles and power  
252 generation) for the 3 largest cities in Korea: Seoul (Pan40), Busan (Pan17), and Gwangju (Pan26). For  
253 Seoul, the amounts of  $C(\text{NO}_2)$  during the morning (1 DU at 10:00) are much less than later in the  
254 afternoon (over 2 -3 DU at 16:00) on almost every day with values occasionally reaching as high as 6 DU.  
255 Even the relatively low morning values of  $C(\text{NO}_2)$  represent a significant amount of pollution. The 6 DU  
256  $C(\text{NO}_2)$  amount in Seoul is unusual, but coincides with the peak values frequently occurring in the late  
257 afternoon.  $C(\text{NO}_2)$  behavior at nearby Olympic Park to the east of Seoul is very similar to Yonsei  
258 University in the heart of Seoul, even though Olympic Park's traffic density is lower than Seoul. Olympic  
259 Park is close enough to the metropolitan Seoul area for the transport of  $\text{NO}_2$  combined with local  
260 production from traffic to produce a very similar diurnal pattern. The moderately large city of Busan also  
261 has high values of  $\text{NO}_2$ , occasionally reaching 3 DU in the afternoon. Busan has relatively low values of  
262  $\text{NO}_2$  in the morning, having peaks in the mid-afternoon and declining in the late afternoon. Gwangju,  
263 located in the southwest, is a smaller city with less pollution (peak values = 1.6 DU) and does not have as  
264 distinct an afternoon maximum.

265

266



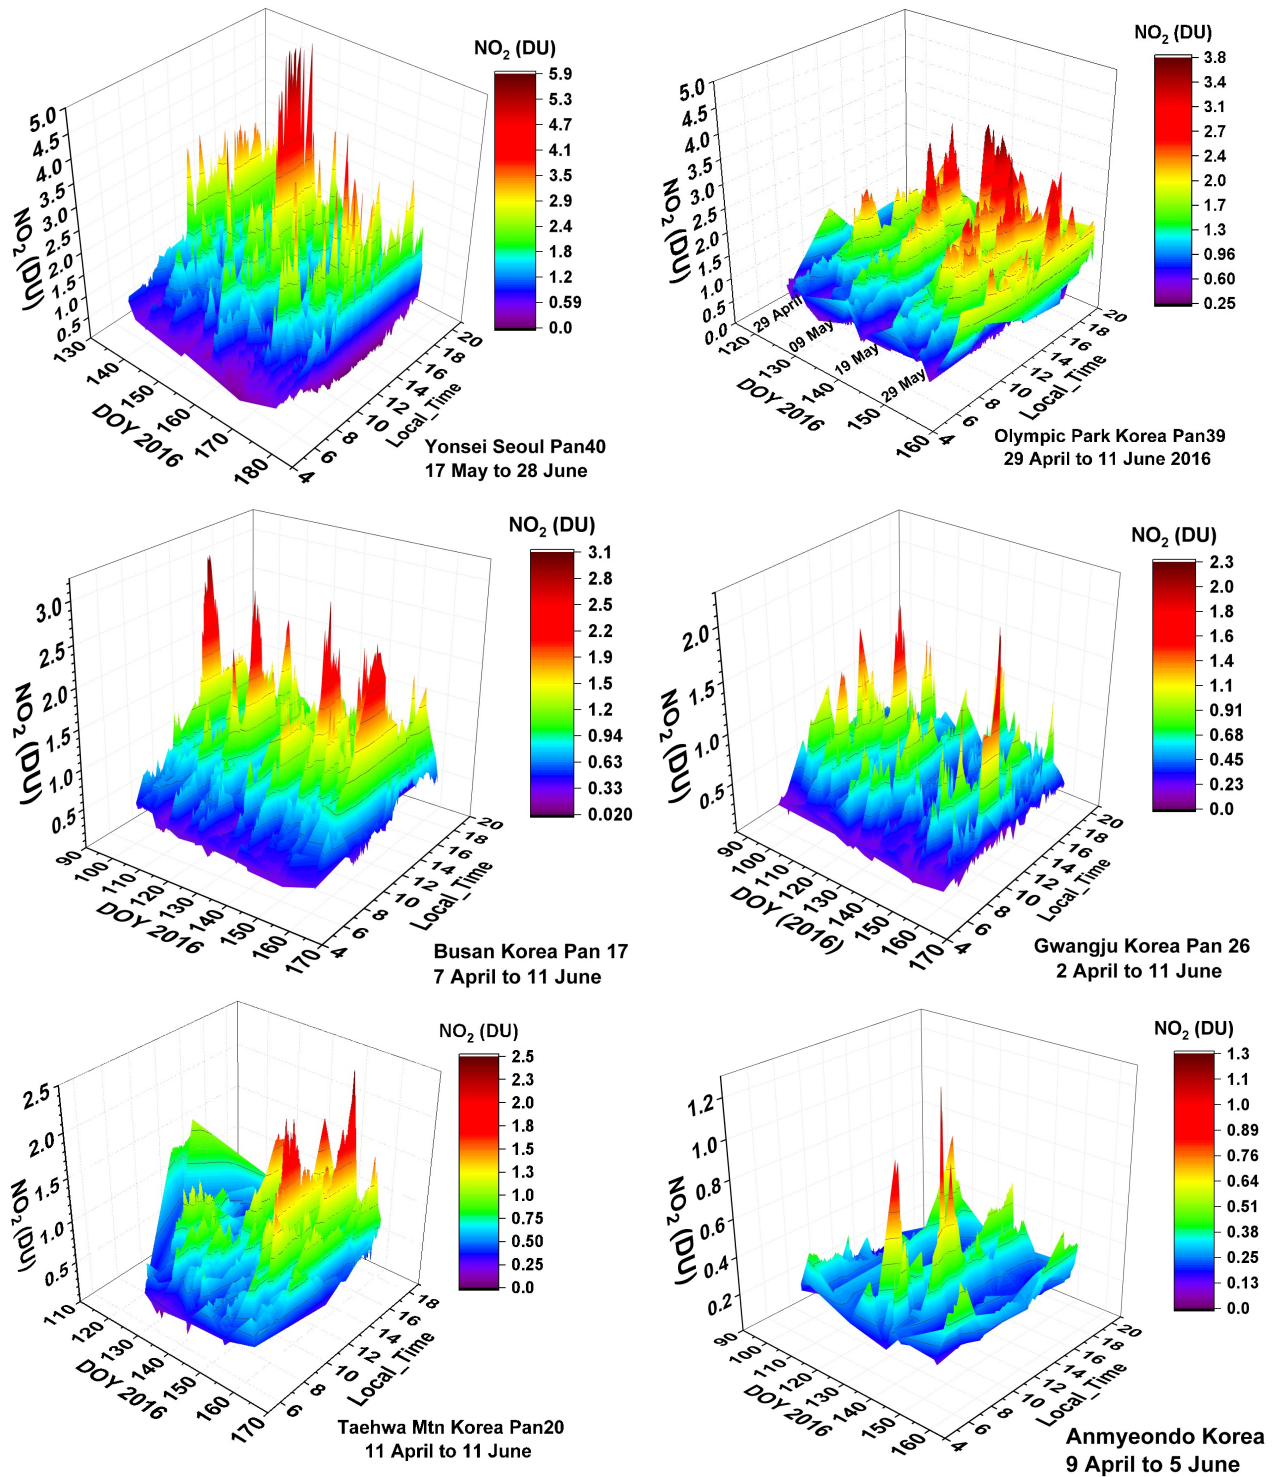

Fig. 5 NO<sub>2</sub> amounts vs Day of the Year (DOY) and Local Time for six sites as labeled in each panel. Day 120=April 29, Day 130=May 9, Day 140=May 19, Day 150=May 29, Day 160=June 8, Day 170 =June18.

268 The panels in Fig. 5 for Taehwa Mtn. and Anmyeondo show regions outside the Seoul  
269 metropolitan area that still show substantial amounts of NO<sub>2</sub>. Compared to Seoul, the Taehwa site is a  
270 semi-rural location with only a small amount of car traffic in the immediate area. However, there are  
271 major highways about 6 km from the site that are close enough to permit transport of NO<sub>2</sub> to the  
272 Taehwa Mountain site. All of the sites showed a tendency to have peak NO<sub>2</sub> occur in the late afternoon.  
273 Anmyeondo on the west central coast of Korea shows C(NO<sub>2</sub>) amounts that are quite low with  
274 occasional plumes arriving from the north or the west (China).

275 The basic daily pattern of C(NO<sub>2</sub>) in urban Korea arises from large amounts of automobile traffic  
276 and power plants emitting NO<sub>x</sub> (for modern automobiles, roughly 99 % NO and 1 % NO<sub>2</sub>). An FTIR  
277 analysis of automobile exhaust shows that NO is emitted at 127 ppm, NO<sub>2</sub> at 1.6 ppm, HCHO at 39 ppm,  
278 and CH<sub>3</sub>OH at 139 ppm as part of the main emissions containing H<sub>2</sub>O (144 ppm) and CO<sub>2</sub> (122 ppm).  
279 (<https://tools.thermofisher.com/content/sfs/brochures/D10248~.pdf>); see also Walters et al., 2015).

280 NO quickly converts into NO<sub>2</sub> in the presence of ozone and volatile organic compounds VOCs in  
281 the atmosphere and can convert back to NO by solar photolysis. KORUS-AQ results frequently show  
282 increasing NO<sub>2</sub> during the day with peaks in the afternoon. For these days the measurements imply that  
283 the amount of locally produced NO<sub>x</sub> and conversion into NO<sub>2</sub> dominates the losses of NO<sub>2</sub> by photolysis  
284 and transport out of the region. Other days occasionally show a different behavior, with NO<sub>2</sub> peaks in  
285 the morning and a decline thereafter suggesting transport out of the region.

#### 286 4 Longer-Term Changes in C(NO<sub>2</sub>)

287 Some of the sites used for the KORUS-AQ campaign (Gwangju and Anmyeondo) had PSIs set up  
288 in April 2015, about one year before the start of the campaign. Two other sites (Seoul and Busan) have  
289 PSI C(NO<sub>2</sub>) data starting in 2012. The extended data sets for Seoul and Busan provide the opportunity to  
290 estimate 5-year changes in C(NO<sub>2</sub>) amount and seasonal dependence.

291 In Fig. 6, the daily variation over one year at Gwangju and Anmyeondo are evaluated to estimate  
292 one year secular trends. The vertical extent in the time series is not noise or uncertainty, but rather the  
293 80 second per data point variability throughout each day (e.g., see Fig. 2). Before calculating linear least  
294 squares slopes, the unadjusted time series (grey data points in Panels A and D) were deseasonalized  
295 (grey data points in Panels B and E) by subtracting a function with zero slope derived from a 30 day  
296 running average (dark line in panels A and D or the identical curves in C and F). The running average  
297 curves in panels A and D are shown with expanded scale in panels C and F to clearly show the seasonal  
298 variation. The “zero slope functions” ZM(t) are obtained by subtracting a linear least squares fit L(t) to  
299 monthly running average curves M(t) in panels C and F to form zero slope functions ZM(t) = M(t) – L(t).  
300 The results ZM(t) are functions that look similar to the M(t) plots in panels C and F, but with zero slopes.  
301 The resulting ZM(t) are then subtracted from the respective original time series (grey circles) in panels A  
302 and D. The results are the grey circles in Panels B and E. Similar monthly running means are shown in  
303 Panels B and E that have almost no monthly variations (see appendix Fig. A1).

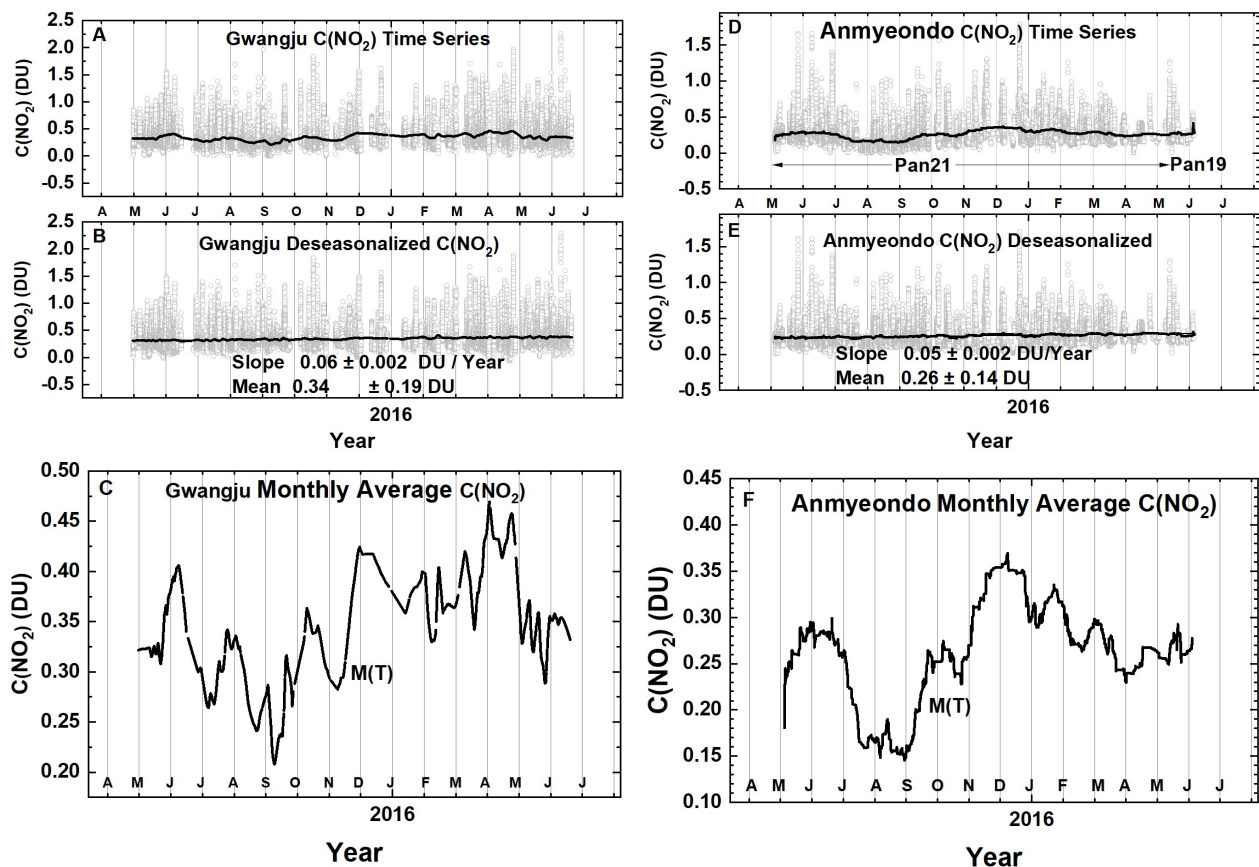

Fig. 6 Approximately 1 year of daily column  $C(\text{NO}_2)$  amount data (Panels A and D) and the monthly running average amount (dark plot in Panels A and D). The data are from GIST at Gwangju and Anmyeondo. Panels A and D are the original time series with one data point every 80 seconds, panels B and E are the deseasonalized time series. Panels C and F are an expanded scale of the monthly running averages  $M(t)$  of  $C(\text{NO}_2)$  that are identical to the solid lines in panels A and D. The vertical extent (panels A, B, D, and E) on a given day is the range of diurnal variation from early morning to late afternoon.

304 The linear trends in Figs. 6B and 6E suggest that there was an increase in pollution levels in  
 305 Gwangju and Anmeondo over the period of observation. The southern city of Gwangju (Pan 26) has  
 306 higher average  $C(\text{NO}_2)$  amounts,  $0.34 \pm 0.19$  DU, compared to the relatively clean coastal site  
 307 Anmyeondo,  $0.26 \pm 0.14$  DU. Gwangju seasonal cycle has a minimum in  $C(\text{NO}_2)$  amount in September-  
 308 October and a very broad maximum from December to May. The Gwangju PSI is located away from  
 309 major city traffic on a university campus (Gwangju Institute of Science and Technology, GIST) so that the  
 310 average amount of  $\text{NO}_2$  (about 0.34 DU) is moderate with some days reaching 1.5 DU. The slopes are  
 311 statistically significant at the 2-standard deviation level ( $p < 0.05$ ) and imply that  $C(\text{NO}_2)$  was increasing  
 312 at a substantial rate. However, the period of observation was too short to estimate multi-year long-term  
 313 trends. Additional long-term monitoring of these sites would be desirable for air quality purposes.

314 The PSI on Anmyeondo was located away from a commercial area with moderate traffic and  
 315 very near the shore of the Yellow Sea at a regional Global Atmosphere Watch (GAW) station. For  
 316 Anmyeondo there is a clear seasonal cycle similar to that in Gwangju with a minimum in September-

317 October and a broad maximum during the winter-spring months. Amnyeondo had an average amount  
 318 of 0.25 DU, which is lower than observed at Gwanjgu.

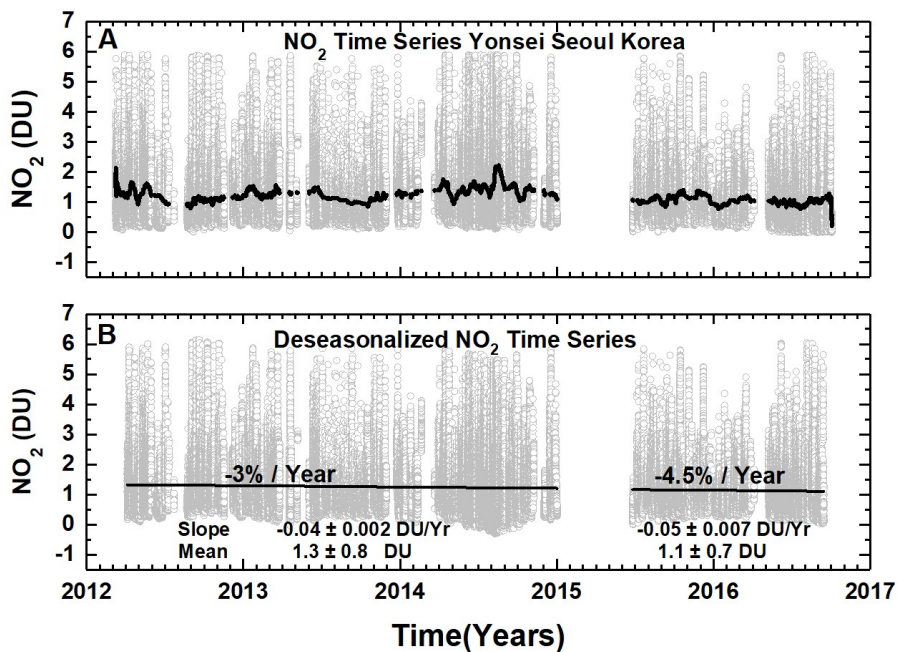

Fig. 7 (A) NO<sub>2</sub> time series at Yonsei University in Seoul NO<sub>2</sub>(grey) and (B) deseasonalized time series. Combined slope =  $-0.05 \pm 0.001$  DU/Year and Mean =  $1.2 \pm 0.8$  DU or the decrease is  $-4 \pm 0.08$  % / Year. Seoul has no clear seasonal cycle.

319

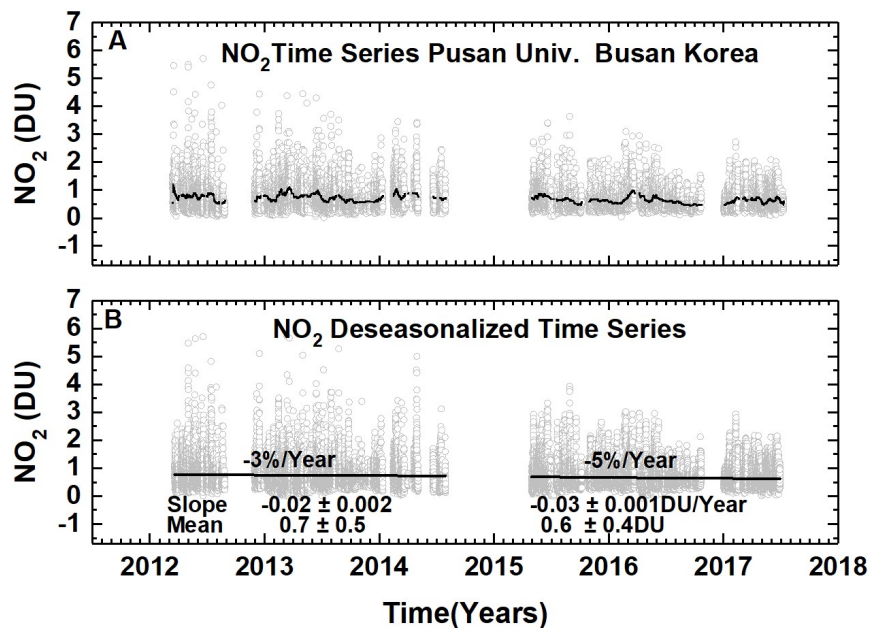

Fig. 8 (A) Pusan University in Busan NO<sub>2</sub> daily time series (grey) and (B) deseasonalized time series with linear trends.

320 Figures 7 and 8 each contain an approximately 5-year daily time series (grey) for Seoul (Yonsei  
321 University) and Busan (Pusan University) and a linear fit to a deseasonalized version of the time series.  
322 Since the observations at both sites had an extended period of missing data, the slopes were estimated  
323 separately for each segment and for the combined time series. Both Seoul and Busan show a steady  
324 reduction in NO<sub>2</sub> air pollution with an average reduction of about -4 % per year. A recent paper by  
325 Duncan et al., (2016) estimated a decrease in C(NO<sub>2</sub>) for Seoul in about a 10 x 10 km box of about 1.6 ±  
326 1.4 % per year over the 2004 to 2013 period based on a 2014 average C(NO<sub>2</sub>) amount of 0.6 DU, or  
327 about half of the average value 1.3 ± 0.8 DU observed by the PSI. The larger reduction in C(NO<sub>2</sub>)  
328 measured by the PSI is caused by a reduction in higher than average afternoon C(NO<sub>2</sub>) amounts that are  
329 rarely observed by OMI overpass at 13:30 local time. OMI is a polar orbiting push broom hyperspectral  
330 instrument (300 – 500 nm with resolution of 0.45 nm in the UV and 1 nm in the visible and a spatial  
331 resolution of 13 x 24 km<sup>2</sup>) onboard the AURA satellite. The high observed late afternoon values are not  
332 restricted to Seoul, but occur for all of the urban areas where the PSI has been deployed. The high late  
333 afternoon values do not regularly occur in remote rural areas such as Amnyeondo.

334 Seoul and Busan C(NO<sub>2</sub>) measurements are remarkable for the large peak amounts that are seen  
335 on most days compared to the 1.5 to 2 DU peak values for Gwangju and Amnyeondo. For Yonsei, the  
336 peak values range above 5 to 6 DU in the years 2012 to 2015, but decrease somewhat in 2015 to 2016.  
337 In 2015 - 2016, the decrease appears to be large, but is only 0.2 DU relative to a mean of about 1.2 DU.  
338 A smaller decrease appears for Busan (Fig. 8) relative to a mean of about 0.6 DU. All of the PSI  
339 measurements show very high values of NO<sub>2</sub> during almost every day when measurements were  
340 possible. Since the NO<sub>2</sub> concentrations represented by these large column amounts are probably in the  
341 boundary layer near the sources of NO<sub>2</sub>, there is a strong effect on local air quality.

342

## 343 5 Comparison with OMI Satellite Overpass Data

344

345 Seoul and Busan have 5-year PSI data records (Figs. 9a and 9b), and Gwangju has a 1-year data  
346 record (Figs. 6 and 10) spanning the KORUS-AQ campaign. The PSI C(NO<sub>2</sub>) can be matched in time (± 8  
347 minutes) with the overpass time from OMI (Ozone Monitoring Instrument) onboard the AURA satellite  
348 (mid-day overpass times 13:30 ± 90 minutes). Figure 9a shows the C(NO<sub>2</sub>) daily variation at the OMI  
349 overpass time with far more high values of C(NO<sub>2</sub>) from the PSI than observed by OMI. The solid lines  
350 represent the seasonal dependence, which are shown separately in Fig. 9b along with the C(NO<sub>2</sub>)  
351 differences, PSI - OMI. The result is that the average PSI values are double those observed by OMI's  
352 large FOV. (OMI Version 03: <https://avdc.gsfc.nasa.gov/index.php?site=666843934&id=13>)

353

354 The seasonal dependence (Fig. 9b) of C(NO<sub>2</sub>) from OMI for both Seoul and Busan is fairly  
355 regular, with maxima in January of each year and minima in July-August. The seasonal behavior of  
356 C(NO<sub>2</sub>) obtained from the PSI for Seoul varies with high values extending from January into the summer  
357 months and with minima varying from August in 2012, September-October in 2013, missing in 2014, July  
358 in 2015, and June in 2016. For Busan, the maxima occur in the Spring for 2013 and 2014, October for  
359 2015, and in the Spring for 2016. The minima are also variable. The difference between OMI and PSI  
360 retrievals depends on local conditions for PSI and on an area average for OMI.

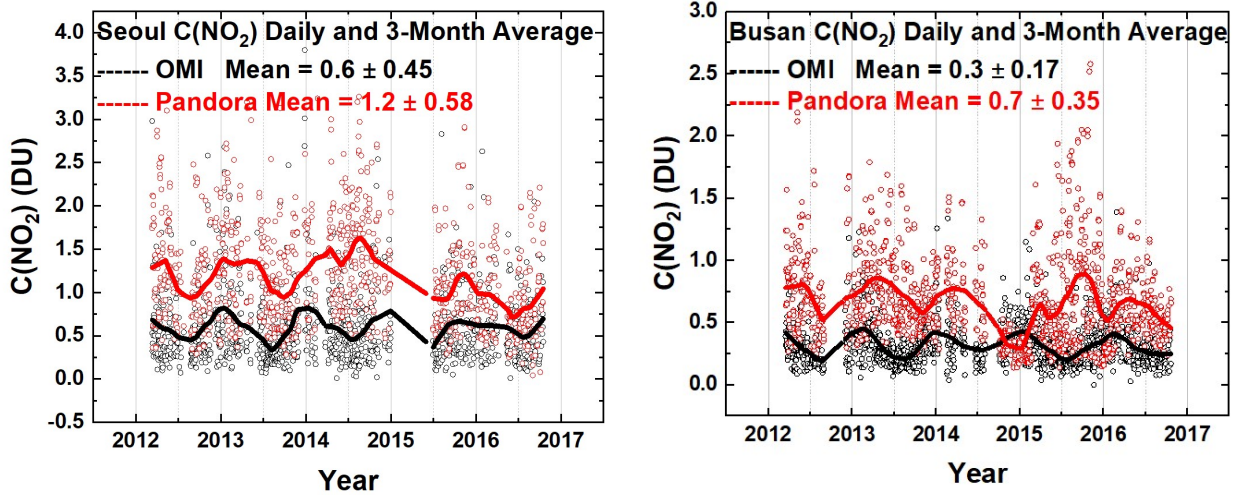

Fig. 9a Comparisons between the daily values of  $C(\text{NO}_2)$  for OMI (black) and PSI (red) at Seoul and Busan for a 5-year period. Solid lines show the average seasonal variation (Lowess(0.1)), see also Fig. 9b. Linear interpolation is used where there are missing data points.

361

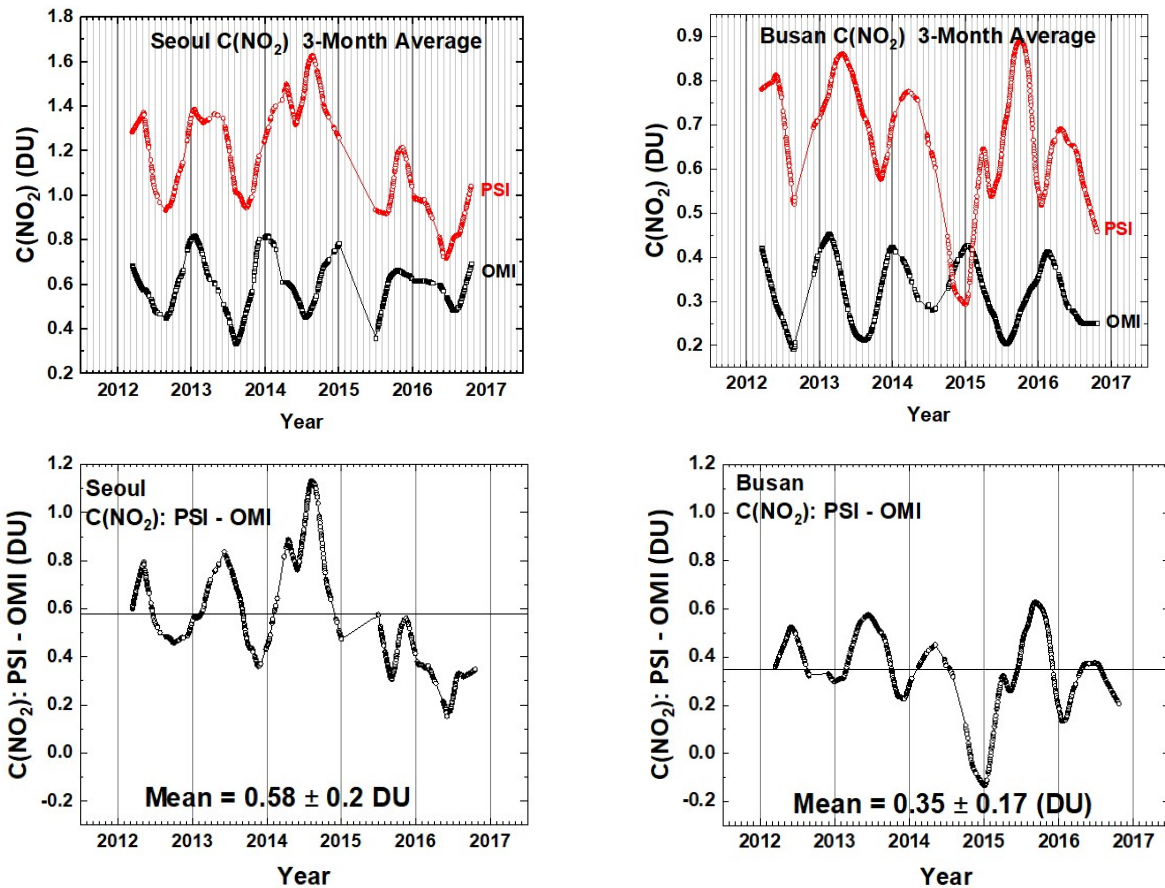

Fig. 9b Comparisons between the seasonal averages for  $C(\text{NO}_2)$  from OMI (black) and PSI (red) at Seoul and Busan for a 5-year period. The lower panels show the seasonal difference between the PSI and OMI. The individual data points are shown derived from a Lowess(0.1) smoothing, approximately a 3-month running averages of the daily data. Interpolation used where there are missing data points.

362  
363  
364  
365  
366  
367  
368  
369  
370

Figure 9b shows that the PSI has a mean difference compared to OMI in Busan of 0.35 DU and peak values (up to 2.5 DU at 13:30 and 4 DU in the late afternoon). The differences are important when considering pollution effects on human health (Krafta et al., 2005; Latza et al., 2009). Even larger differences are observed in Seoul, where the mean difference is 0.58 DU between Pandora and OMI at the satellite overpass time. **The results from PSI suggest that local ground-based monitoring of pollution is important for estimating their impact on human health, particularly since amounts of C(NO<sub>2</sub>) occurring later in the afternoon exceed the amounts at the time of the satellite overpass.**

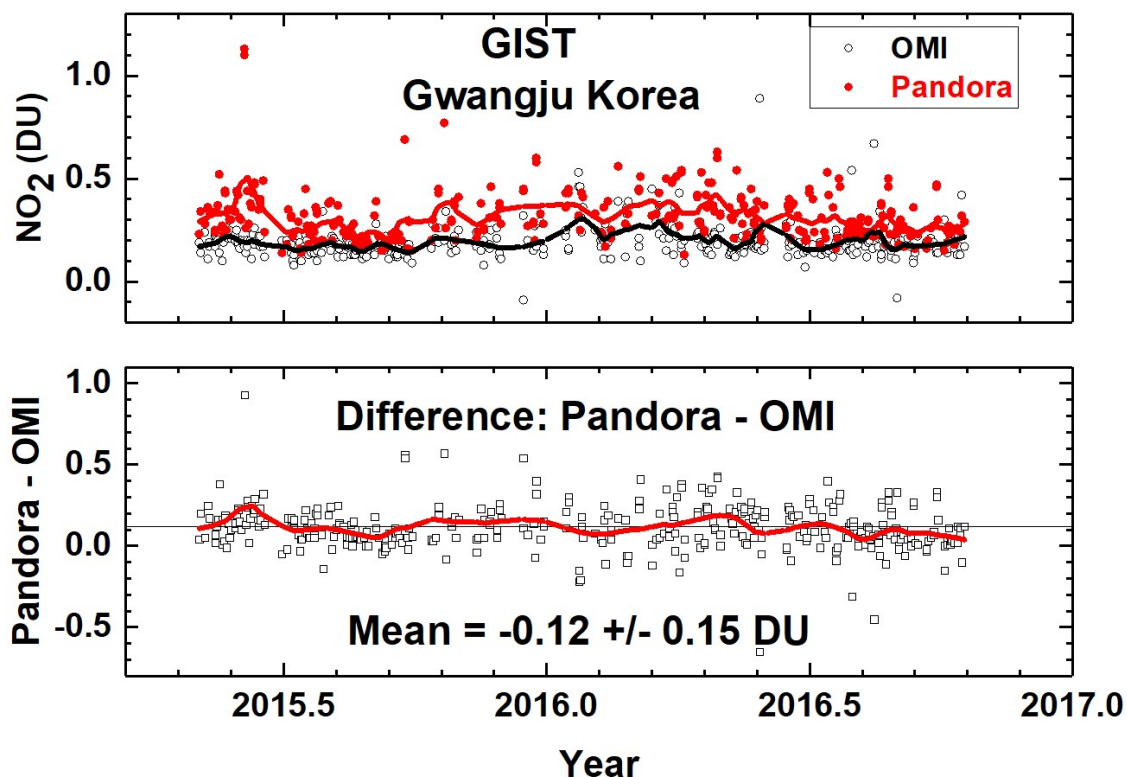

Fig. 10 C(NO<sub>2</sub>) time series from Pandora (red) and OMI (black) for GIST University in Gwangju Korea and their differences. The comparison is formed from time coincidences between Pandora and OMI.

371 A comparison with Lowess(0.1) fits (Locally Weighted least squares fit to 0.1 of the data points,  
372 (Cleveland, 1981)) to the matched Pandora vs OMI overpass data (about 3-month averages) shows that  
373 PSI C(NO<sub>2</sub>) is larger than OMI measured C(NO<sub>2</sub>) mostly because of its much smaller 2<sup>o</sup> field of view (a  
374 circle of 35 meters diameter at 1 km altitude) compared to OMI's FOV of 13 x 24 km<sup>2</sup> at nadir, which  
375 may encompass areas outside of the city or the adjacent ocean areas. For example, the center of Seoul  
376 is about 48 km from the Yellow Sea, while the OMI overpass file lists FOV center distances of over 60 km  
377 from Seoul. Another possible reason for the differences is that OMI C(NO<sub>2</sub>) retrievals use NO<sub>2</sub> vertical  
378 profile shape factors from the low resolution (~110 x 110 km) Global Model Initiative (GMI) model  
379 simulation to calculate air mass factors that are used to determine observed tropospheric NO<sub>2</sub> vertical  
380 columns, while much finer resolution profiles are needed to more accurately represent highly polluted

381 urban areas such as Seoul. Increases in OMI retrieved tropospheric column NO<sub>2</sub> up to 160 % are found  
382 when using model derived 1.33 x 1.33 km<sup>2</sup> profile shape factors (Goldberg et al., 2017). The effect of  
383 moderate amounts of cloud or aerosol have little effect on the PSI direct-sun spectral fitting retrieval of  
384 C(NO<sub>2</sub>) as shown in Fig. 2. OMI and MAXDOAS retrievals are sensitive to the presence of aerosols and  
385 clouds (Kanaya et al., 2014), which may contribute to the underestimate of C(NO<sub>2</sub>) by OMI even after  
386 corrections are made for retrieved aerosol and cloud amounts (Chimot, et al. 2016).

387  
388 The implications for assessing clean air indices suggest that OMI underestimates the human  
389 health effect from trace gases such as NO<sub>2</sub>, especially in highly populated urban areas. Figure 5 gives a  
390 much clearer picture of the degree of pollution than is possible with just the 13:30 OMI comparison  
391 measurements, since the late afternoon is the time of maximum pollution.

392  
393 The city of Gwangju is much smaller than Busan, with less industrial activity, especially  
394 automobiles. PSI observations at GIST show much closer agreement with OMI (Fig. 10), especially since  
395 GIST is located within the city boundaries, but in an area with much less concentrated industrial activity  
396 compared to the center of Gwangju. The large OMI FOV over a relatively clean area reduce the OMI  
397 difference in measured NO<sub>2</sub> amount compared to the PSI C(NO<sub>2</sub>) amounts. OMI still measures less than  
398 the PSI (0.12 ± 0.15 DU), but the mean difference is not statistically significant. However, OMI clearly  
399 misses the high values of C(NO<sub>2</sub>) that are present in the PSI observations.

400  
401

## 402 **5.1 Comparison with 4STAR DC-8 Overpass Data**

403  
404 C(NO<sub>2</sub>) results were obtained by the Spectrometer for Sun-tracking Sky-Scanning Atmospheric  
405 Research (4STAR) flown on-board the DC-8 during KORUS-AQ and compared with the PSI (Fig. 11). The  
406 4STAR is an airborne sunphotometer, capable of measuring total C(NO<sub>2</sub>), C(O<sub>3</sub>), water vapor and AOD  
407 columns in its direct-sun mode (Segal-Rozenhaimer et al., 2014; Shinozuka et al., 2013), which is similar  
408 to the mode used by the PSI network.

409  
410 A detailed description of 4STAR is given in Dunagan et al., (2013). In brief, the instrument has  
411 two structurally rigid grating array spectrometers that are combined to yield continuous spectra  
412 between 300-1700 nm. The instrument sampling rate is 1 Hz, and the nominal integration time used for  
413 C(NO<sub>2</sub>) retrievals is 50 ms (with six spectra averaged per one sampling period). Dark counts are  
414 measured every 20 min using a shutter mechanism. The 4STAR light collection system has fiber optic  
415 bundle foreoptics that is connected to the spectrometers. A two-axis motion control system with analog  
416 feedback provides active tracking of the solar disk. The instrument full field of view (FOV) is ~1.25°.  
417 C(NO<sub>2</sub>) is retrieved following a method described in Segal-Rozenhaimer et al. (2014), but using the 460-  
418 490 nm spectral range. A series of 4STAR columnar NO<sub>2</sub> values above aircraft (for legs below 300 m)  
419 taken from DC8 “missed approach” maneuvers overflying Olympic Park PSI station, within a radius of 5  
420 km, are shown in Fig. 11. There is a relatively good correlation (R<sup>2</sup>=0.7), with a slight positive bias of  
421 4STAR compared with the PSI values. This might result from higher noise effects (i.e. small amount of  
422 spectra averages) for 4STAR during the fast change of altitude when the aircraft performs its “missed



423 approach” overpasses over the PSI stations. Relaxing the altitude constraint to include legs below 500 m  
 424 showed good agreement with the PSI station at Taewha Mountain, but with an overall lower correlation  
 425 coefficient ( $R^2=0.54$ ), which is expected due to averaging of larger vertical range. As with PSI, 4STAR  
 426 shows better agreement with OMI  $C(NO_2)$  for low values of  $C(NO_2)$ , but considerable differences over  
 427 polluted areas (Segal-Rozenhaimer et al., *in prep.*), when 4STAR  $C(NO_2)$  values are averaged within each  
 428 of the OMI pixels corresponding to the flight path for each of the days.  
 429

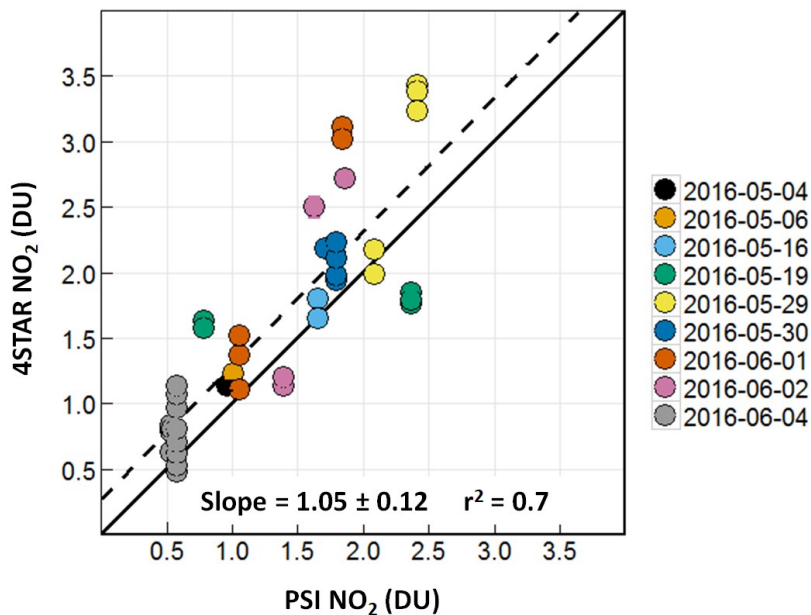

Fig. 11 A correlation plot of  $C(NO_2)$  from 4STAR onboard the DC-8 compared to the  $C(NO_2)$  amount measured by the PSI at Olympic Park on nine different days. The solid black line is the 1:1 line drawn for reference. The dashed line represents the data linear fit, with a slope of 1.05, and a correlation coefficient  $r^2 = 0.7$ , as shown on the plot.

430  
 431  
 432  
 433

## 6 Formaldehyde from Five Korus-AQ Sites

434 PSI makes two sets of direct-sun measurements every 80 seconds. One set is for measurements  
 435 in the visible range (380 – 525 nm used for  $NO_2$ ) and the other is for the UV range (290 – 380 nm with a  
 436 filter, U340, which blocks visible light). Formaldehyde is derived from the same set of spectral  
 437 measurements used for ozone (i.e., with a U340 blocking filter), but using the spectral range 332 - 359  
 438 nm. Sources of error in the  $C(HCHO)$  retrieval arise from the selection of the fitting window and the  
 439 amount of  $C(HCHO)$  remaining in the reference spectrum after application of the modified Langley  
 440 estimation (MLE) method of calibration (Herman et al., 2009, Spinei et al., 2018). The MLE extrapolation  
 441 to zero  $C(HCHO)$  could have an offset error of 0.1 to 0.2 DU. Selecting different fitting windows can also  
 442 cause the  $C(HCHO)$  retrievals to differ. For example, a wider alternate fitting window, 324 -360 nm,  
 443 retrieves HCHO values that are about 8 % higher because of different amounts of interference from  
 444 overlapping absorption by  $O_3$ ,  $NO_2$ , and BrO at the spectral resolution of 0.5 to 0.6 nm currently in use.

445 Absolute offset errors do not affect the retrieval precision (relative column amounts), which is  
446 approximately 0.1 DU. A detailed analysis of the algorithms and uncertainties is discussed by Spinei et  
447 al., 2018.

448  
449 The Olympic Park area has much more vegetation than central Seoul for the production of  
450 isoprene (<http://www.olympicpark.co.kr>), which is a significant source of the chemicals needed for  
451 formaldehyde production in the atmosphere (Luecken et al., 2012). Observations from PSI show that  
452 C(HCHO) starts out every day at low levels 0.6 DU at about 08:00 and increases to over 2 DU until 18:00  
453 (Fig.s 12 and 13). Most HCHO arises from photochemical production, while a significant fraction is  
454 chemically derived from automotive emissions in densely populated urban areas (Friedfeld et al., 2002;  
455 Garcia et al., 2006; Lei et al., 2009; Liteplo et al., 2010). Regardless of the precursor source, HCHO forms  
456 in the atmosphere primarily by photochemistry, which causes HCHO to usually be a minimum early in  
457 the day, increase into the afternoon, and decline towards evening. The PSI C(HCHO) observations (Figs.  
458 12 and 13) support this pattern of daily variation.

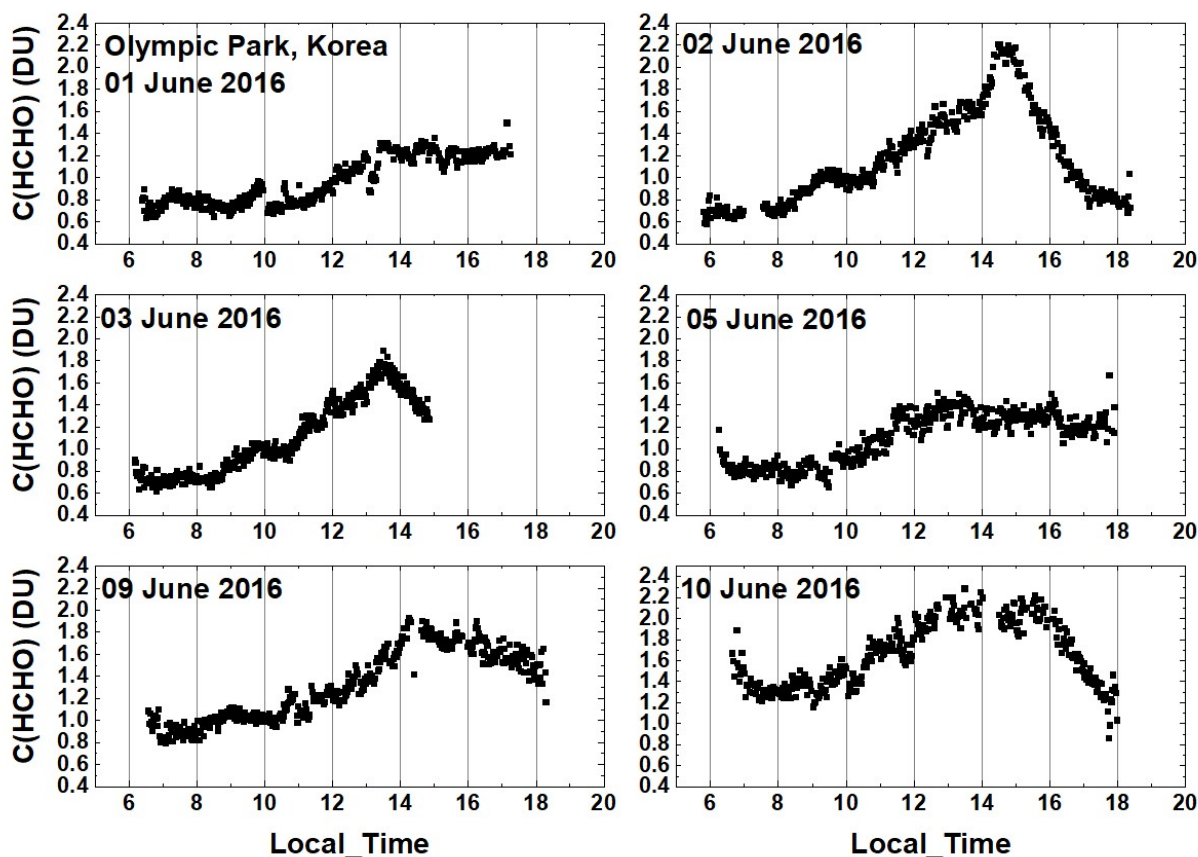

Fig. 12 C(HCHO) from PSI at Olympic Park for 6 days in June 2016. C(HCHO) on 2 June 2016 has a peak value of 2.3 DU at 14:30 hours.

460  
461 A summary of the daily time dependence of C(HCHO) at Olympic Park during the entire  
462 KORUS-AQ campaign is shown in Fig. 13. As in Fig. 12, minimum values are observed in the

463 morning (06:00 – 08:00) before the chemical and direct sources of HCHO are significant. There  
464 is strong buildup during the day that reached a maximum between 15:00 to 16:00, and then  
465 diminished towards sunset. As with NO<sub>2</sub>, the daily pattern of late afternoon peaking of HCHO  
466 amounts presents a problem for polar orbiting satellite observations (e.g., OMI observations at  
467 13:30) assessing air quality.

468  
469  
470

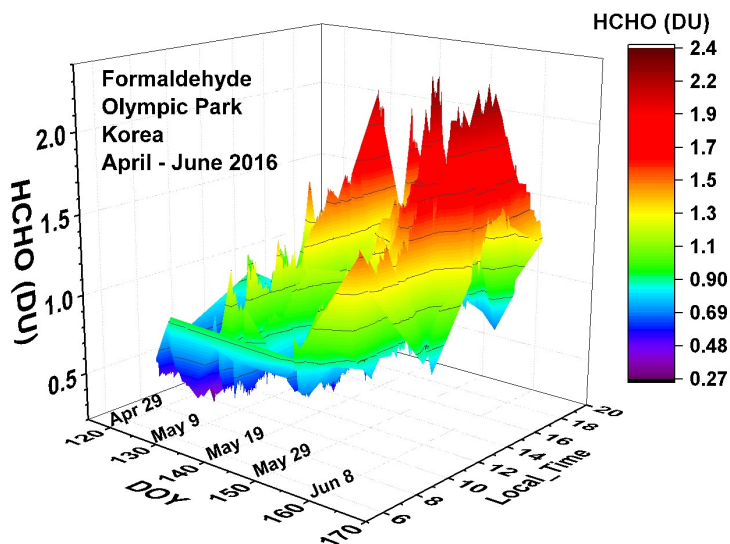

Fig. 13 Pandora measured formaldehyde amounts vs day of the year and local time for 29 April 2016 to 11 June 2016 in Olympic Park.

471  
472  
473  
474  
475  
476  
477  
478  
479

Figure 14 shows two altitude profiles acquired by the Compact Atmospheric Multispecies Spectrometer (CAMS) (Richter et al., 2015) onboard the DC-8 aircraft as it spiraled over the Olympic Park area on 4 May 2016 in the morning and at midday. Quoting from Richter et al., (2015), “CAMS is a multi-species spectrometer configured for the simultaneous detection of ethane (C<sub>2</sub>H<sub>6</sub>) and formaldehyde (CH<sub>2</sub>O). The spectrometer utilizes a tunable, fiber optically pumped difference frequency generation laser source in combination with a Herriott type multi-pass absorption cell with an effective path length of 89.6 m”

480 The morning integrated amount on 4 May was  $1.02 \times 10^{16}$  molecules  $\text{cm}^{-2}$  (0.38 DU) and the  
481 afternoon amount was  $6.95 \times 10^{15}$  molecules  $\text{cm}^{-2}$  (0.26 DU), both substantially less than the PSI  
482 measured values of 0.48 DU and 0.42 DU, respectively. There were no surface measurements of HCHO  
483 mixing ratio on 4 May at Olympic Park. On 2 June at 11:40 there was a surface measurement 3.94 ppb.  
484 Including the surface measurement in the profile integral yields  $\text{Integ}(0.026, 7.2 \text{ km}) = 0.55 \text{ DU}$ , while PSI

485 measured 1.2 DU, which is consistent with the differences shown in Fig. 14. The notation in Fig 14 is

486 
$$\text{Integ}(z_1, z_2) = \int_{z_1}^{z_2} \text{HCHO}(z) dz$$
 for the altitudes  $z_1$  to  $z_2$ .

487

488

489

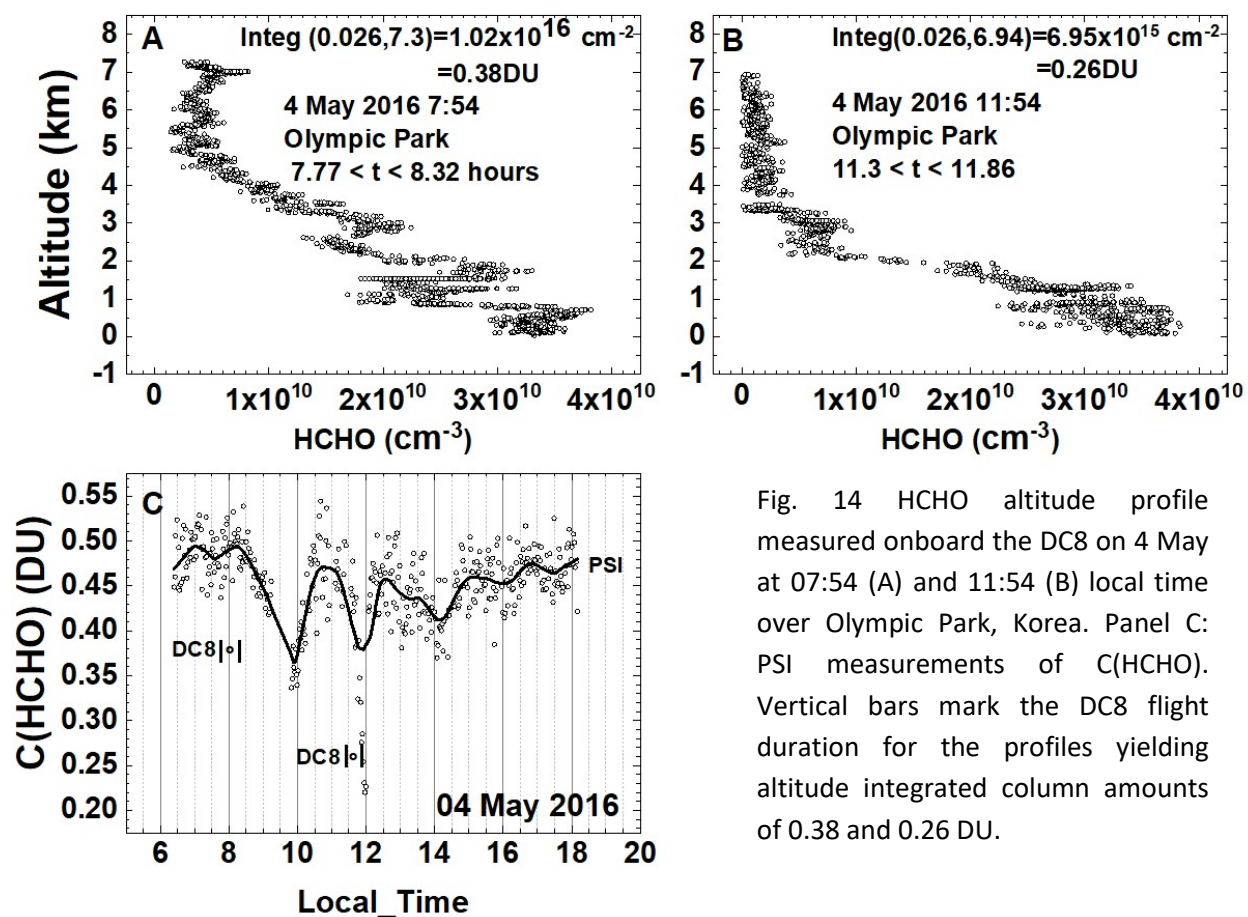

Fig. 14 HCHO altitude profile measured onboard the DC8 on 4 May at 07:54 (A) and 11:54 (B) local time over Olympic Park, Korea. Panel C: PSI measurements of C(HCHO). Vertical bars mark the DC8 flight duration for the profiles yielding altitude integrated column amounts of 0.38 and 0.26 DU.

490 The profiles used data for lower altitudes obtained from aircraft “missed approach”  
 491 maneuvers at a nearby Seoul Airbase, 8.5 km from Olympic Park, (Fig. 15). When available, a  
 492 single surface altitude point was added using ground-based volume mixing ratio measurements  
 493 obtained from US Environmental Protection Agency measurements using quantum cascade  
 494 laser instruments (Hottle et al., 2009, Spinei et al., 2018 and references therein). The DC-8 minimum  
 495 altitude exactly over Olympic Park was typically around 0.4 km above the surface (black circles  
 496 Fig. 15). Large vertical DC-8 HCHO gradients were observed as the DC8 descended to lower  
 497 altitudes over Seoul Airbase. A comparison of 10-second DC-8 HCHO averages at the points of  
 498 closest spatial approach to the Olympic Park (black circles) site on June 4, for example, to peak  
 499 HCHO measurements during missed approaches at the nearby Seoul Airbase (20 – 40 meters  
 500 above the ground) revealed ratios in the observed HCHO (black circles) ranging between 75 % to

501 83 % of the maximum values near the surface. Since Olympic Park DC-8 overpasses miss  
 502 significant near surface HCHO amounts, the profiles shown in Figs. 14 and 16 incorporate the  
 503 HCHO amounts down to the surface at an altitude of 0.026 km asl derived from the “missed  
 504 approach” at Seoul airbase. HCHO measurements above the maximum altitude over Olympic  
 505 Park (see Fig. 14 and 16) were taken from the closest time over the Taewha Mtn. site, 28 km  
 506 from Olympic Park. The assumption is that the horizontal gradients above 2.2 km (Fig. 15) can  
 507 be neglected,  
 508

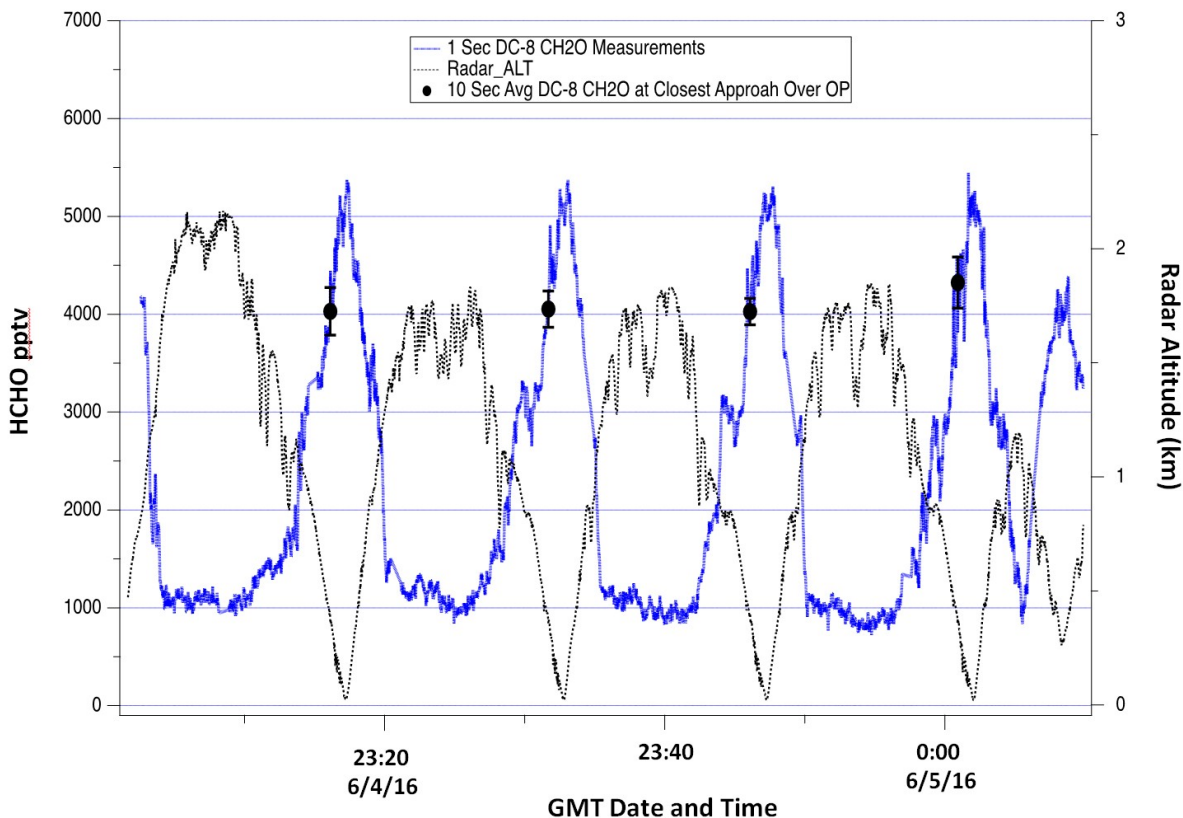

Fig. 15 DC-8 HCHO measurements over Olympic Park on June 4. The continuous blue profiles show the 1-second HCHO data while the black points with error bars show the 10-second average and standard deviation of this data at points of closest approach above the Olympic Park site.

509  
 510 After conversion from mixing ratio to molecules/cm<sup>3</sup> using the measured atmospheric  
 511 density, the resulting profile data were integrated from the minimum (0.026 km asl, Table 1) to  
 512 the maximum heights indicated in Fig. 14. The result is 0.38 DU at 07:54 and 0.26 DU at 11:54  
 513 compared to the measurements from the Pandora instrument 0.48 and 0.38 DU The derived  
 514 vertical HCHO columns from the DC8 data in Fig. 14 A and B are 79 % of PSI measured C(HCHO) in the  
 515 morning and 68 % of PCI C(HCHO) at midday (Fig 14 C).  
 516

517 A similar comparison is shown in Fig. 16 for 5 June 2016 where the amount of C(HCHO)  
 518 is much larger than on 4 May. Integration of the measured profiles yields column densities of  
 519 0.60 and 0.82 DU at 08:30 and 15:21 hours. For this case, at both times the DC8 values are  
 520 about 77 % and 63 % of the PSI measured column amounts, 0.78 and 1.3 DU. For both cases in  
 521 Figs. 14 and 15 the 23 % to 37 % differences are outside of the expected error from PSI fitting  
 522 window selection and from residual HCHO included in the MLE calibration method.  
 523

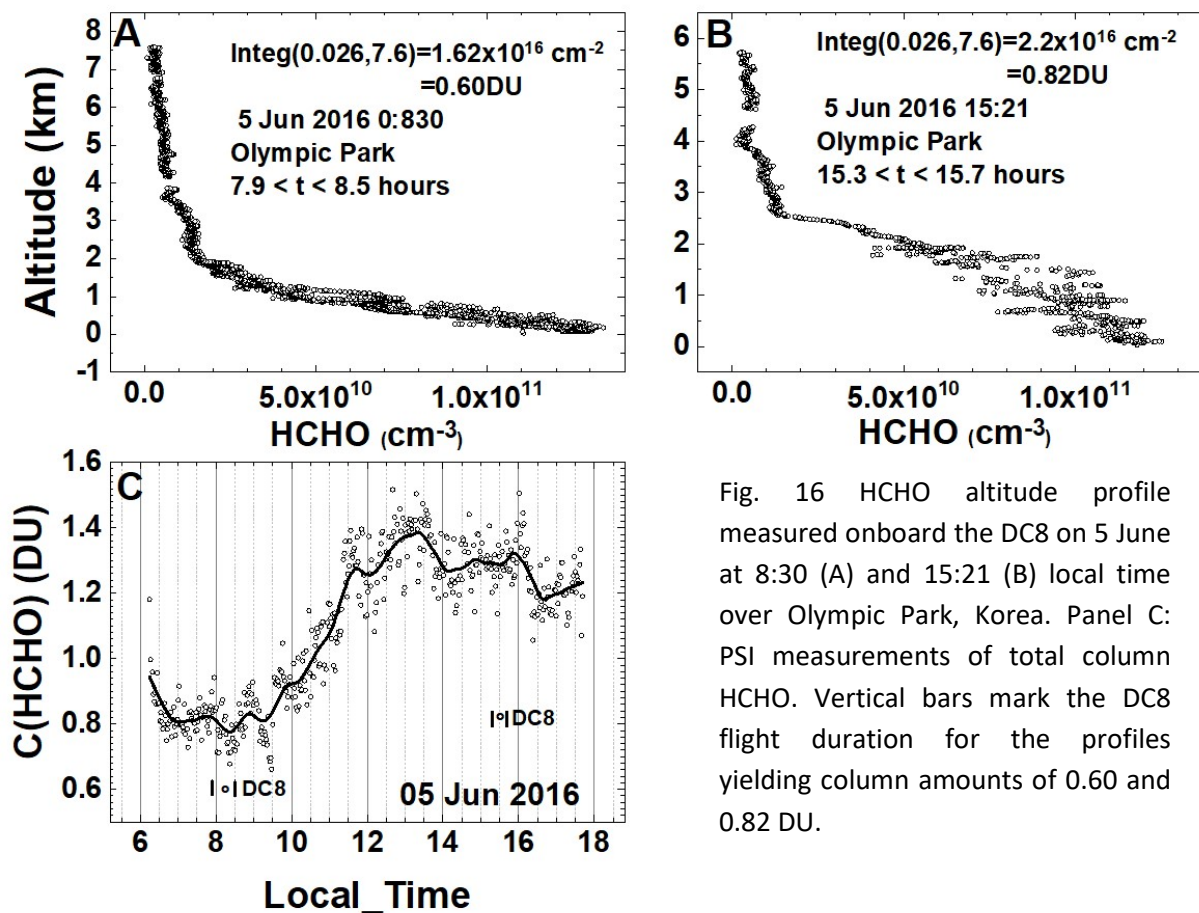

Fig. 16 HCHO altitude profile measured onboard the DC8 on 5 June at 8:30 (A) and 15:21 (B) local time over Olympic Park, Korea. Panel C: PSI measurements of total column HCHO. Vertical bars mark the DC8 flight duration for the profiles yielding column amounts of 0.60 and 0.82 DU.

524  
 525 Another Olympic Park case on 9 June 2016 shows DC8=0.79 vs PSI=1 DU at 08:06,  
 526 DC8=0.74 vs PSI=1.3 DU at 12:12, and DC8=1.13 vs PSI=1.9DU, or the DC8 measurements are 79  
 527 % and 57 % less than the PSI total column HCHO. All of the remaining comparisons of DC8  
 528 profile results with PSI C(HCHO) show similar results. The reasons for the disagreement between  
 529 C(HCHO) measured by direct sun observations (PSI) and the integrated column density from aircraft  
 530 measurements of HCHO VMR are not known. Contributions to the differences include the selection of  
 531 the PSI wavelength window (332 - 359 nm) and possible interference from overlapping NO<sub>2</sub> and O<sub>3</sub>  
 532 absorption that are not properly included, and, more likely, the use of CAMS measured volume mixing  
 533 ratios at the lowest altitudes from the nearby Seoul airbase, 8.5 km from Olympic Park, where spatial

534 variation may affect the calculation of C(HCHO). The use of Taehwa Mtn. data for higher altitudes over  
535 Olympic Park contributes 25 % for 3 of the above cases and 50 % for 4 May 2016 at 07:54 (Fig.  
536 14A). This is probably not the reason for the disagreement between CAMS and PSI, since the percent  
537 underestimate for CAMS over Taewha is about the same magnitude (Table 2) as over Olympic Park.

538  
539 PSI measurements show that Olympic Park produces more HCHO almost every day than  
540 observed at the Yonsei University in Seoul and Taehwa Mountain sites (Figs. 12, 17, 18). The  
541 hourly variations observed during the KORUS-AQ campaign at the Yonsei University in Seoul  
542 and at Taehwa Mountain sites are similar to Olympic Park even though most of the HCHO is  
543 locally produced by photochemistry, but has a relatively short lifetime of a few hours in  
544 polluted air where there is significant ozone and OH. However, at typical wind speeds of 10 -20  
545 km/hour and a chemical lifetime of 2.5 hours (Dufour et al., 2009), HCHO can be transported  
546 about 25 – 50 km, which is far enough for some transport of HCHO between the PSI sites at  
547 Yonsei, Olympic Park, and Taehwa Mtn. DC8 CAMS results over the Taehwa Mtn. site compared  
548 to PSI are given in Table 2 with differences similar to Olympic Park  
549

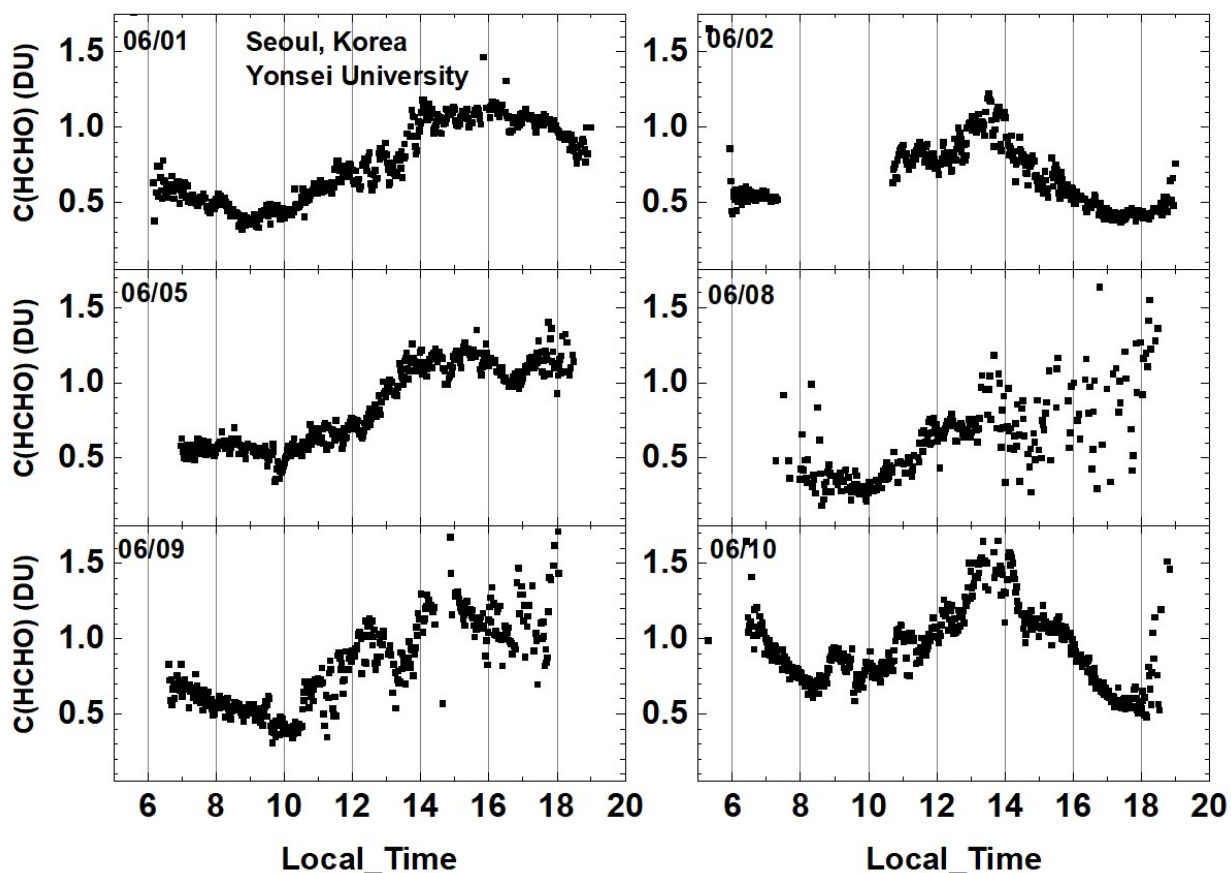

Fig. 17 Total column HCHO from Pandora Yonsei University, Seoul for 6 days in June 2016. C(HCHO) on 2 June 2016 has a peak value of 1.2 DU at 13:30 hours.

550  
 551  
 552  
 553  
 554

Table 2 Taehwa Mtn DC8 compared to PSI measurements (see 10 Jun in Fig. 18)

| Date   | LT       | DC8 HCHO DU | PSI HCHO (DU) | Percent |
|--------|----------|-------------|---------------|---------|
| 11 May | 08:25:19 | 0.4         | 0.6           | 67      |
| 18 May | 08:34:26 | 0.4         | 0.5           | 80      |
| 30 May | 12:05:00 | 0.5         | 0.9           | 56      |
| 10 Jun | 08:22:45 | 1           | 1.16          | 86      |
| 10 Jun | 12:22:53 | 1           | 1.5           | 67      |
| 10 Jun | 15:46:03 | 1           | 1.3           | 77      |

555

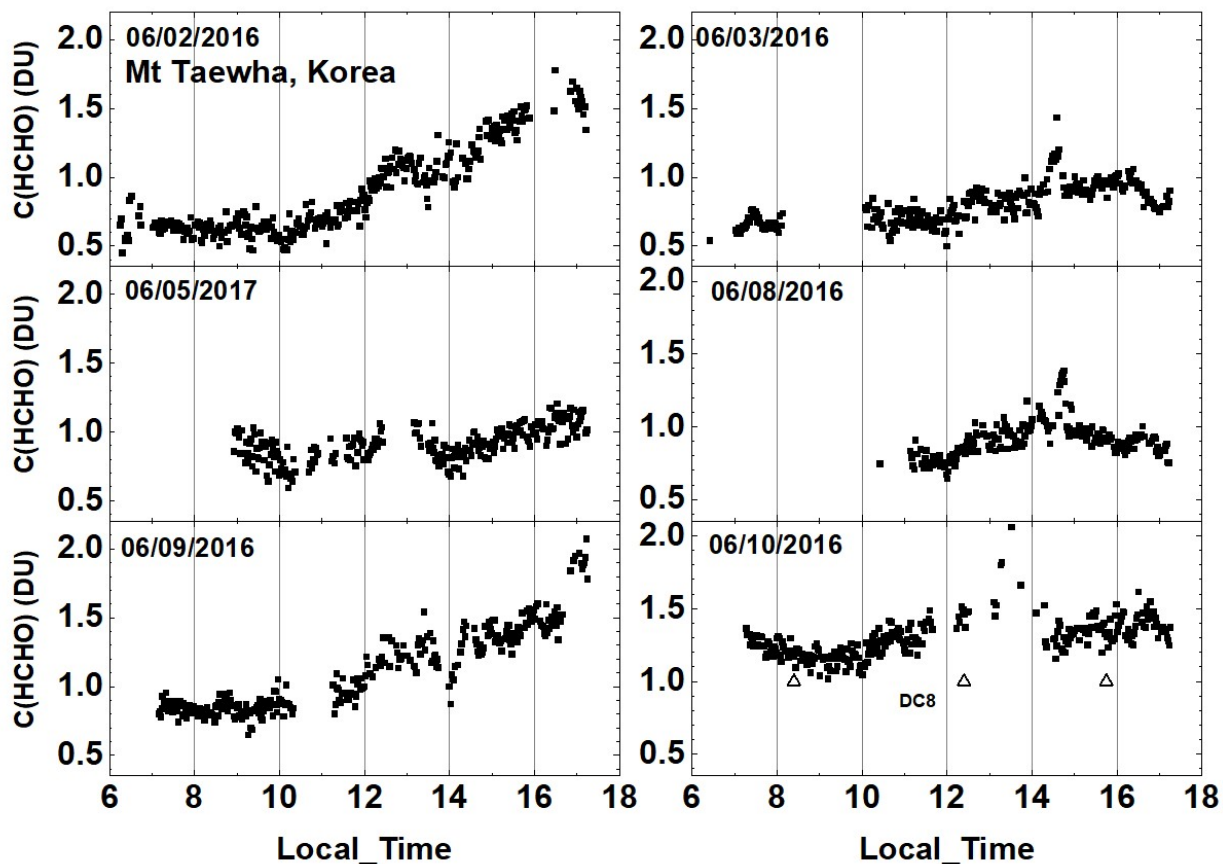

Fig. 18 Total column HCHO from Pandora at Taehwa Mountain for 6 days in June 2016. C(HCHO) on 2 June 2016 has a peak value of 1.7 DU at 16:20. △ are DC8 measurements on 10 June

556  
 557



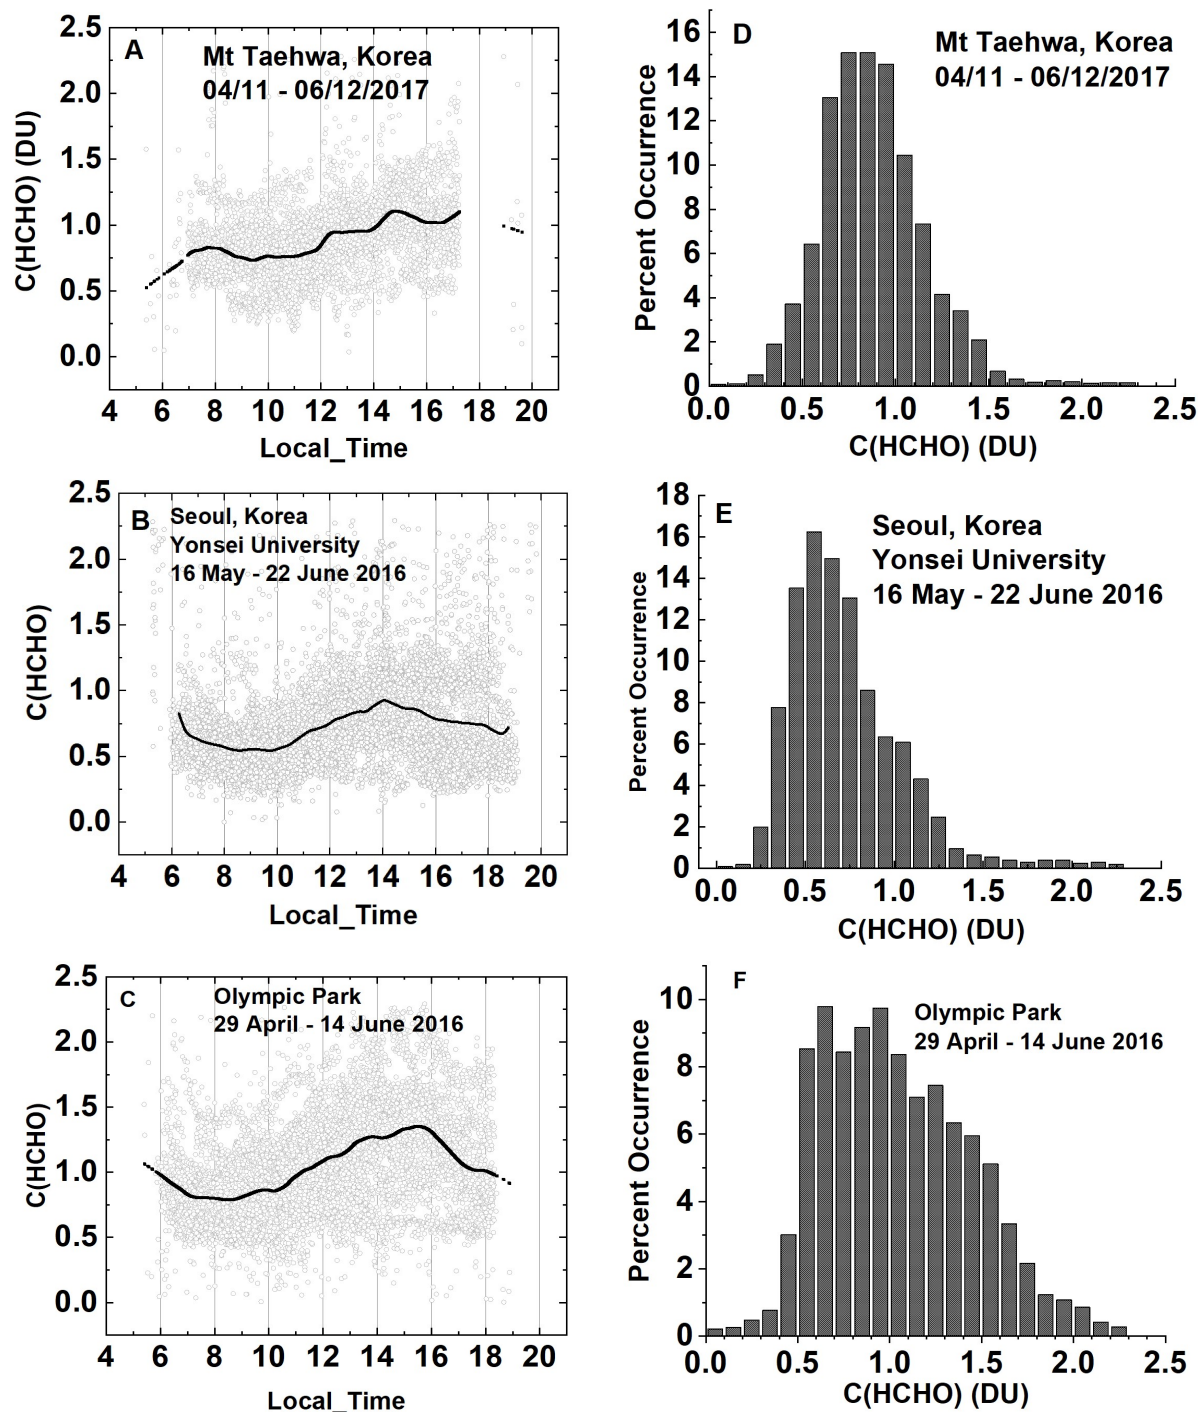

Fig. 19a Summary of total column HCHO for the stated dates during the KORUS-AQ campaign. The solid line is a Lowess(0.1) fit to the data. The sharp cutoffs in panel A, B, and C were caused by obstructions of the direct sun from the PSI FOV in the afternoon.

558

559

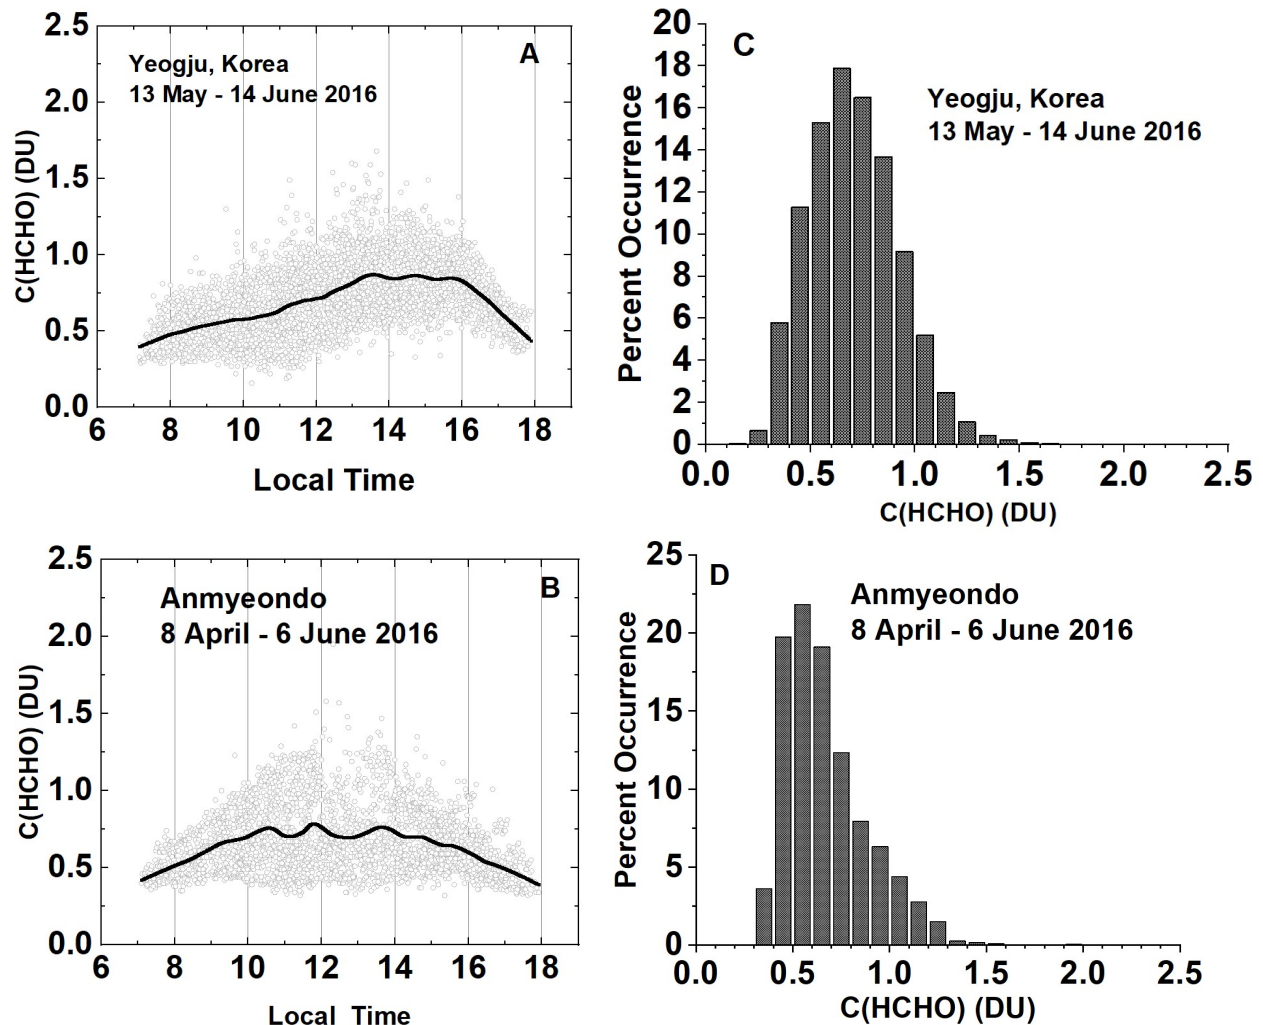

Fig. 19b Summary of total column HCHO for the stated dates during the KORUS-AQ campaign. Panels A and B represent the daily variation at a given local time. The solid line is a Lowess(0.1) fit to the data. Panels C and D show the frequency of occurrence (%) for different amounts of HCHO.

560 Figure 19a and 19b summarizes all of the C(HCHO) data obtained during KORUS-AQ at  
 561 the five sites. The graphs on the left show all of the data points (light gray circles) as a function  
 562 of the local time and a Lowess(0.1) fit to the data showing the average hourly behavior. The  
 563 spread of the data about the Lowess(0.1) fit represents the day-to-day variation at a given local  
 564 time. On average, Mt. Taehwa tends to increase throughout each day, while Yonsei and  
 565 Olympic Park show maxima at 14:00 and 15:30, respectively. Similarly, in Fig. 18b Yeogju  
 566 increases during the day having a maximum at 17:42 while Anmyeondo has a broad peak with  
 567 maxima at 12:00 and 13:42.  
 568

569 The histograms on the right side of Fig. 19 represent the percent frequency of  
 570 occurrence of C(HCHO) in 0.1 DU bins. C(HCHO) at Mt. Taehwa and Seoul rarely exceeds 1.5 DU

571 compared to Olympic Park where C(HCHO) > 2 DU for a significant fraction of time. The most  
 572 frequent values are 0.6 DU for Seoul, 0.9 DU for Mt Taehwa, and over 1 DU for Olympic Park.  
 573 Olympic Park also has a broader distribution towards higher values of C(HCHO) than other sites.

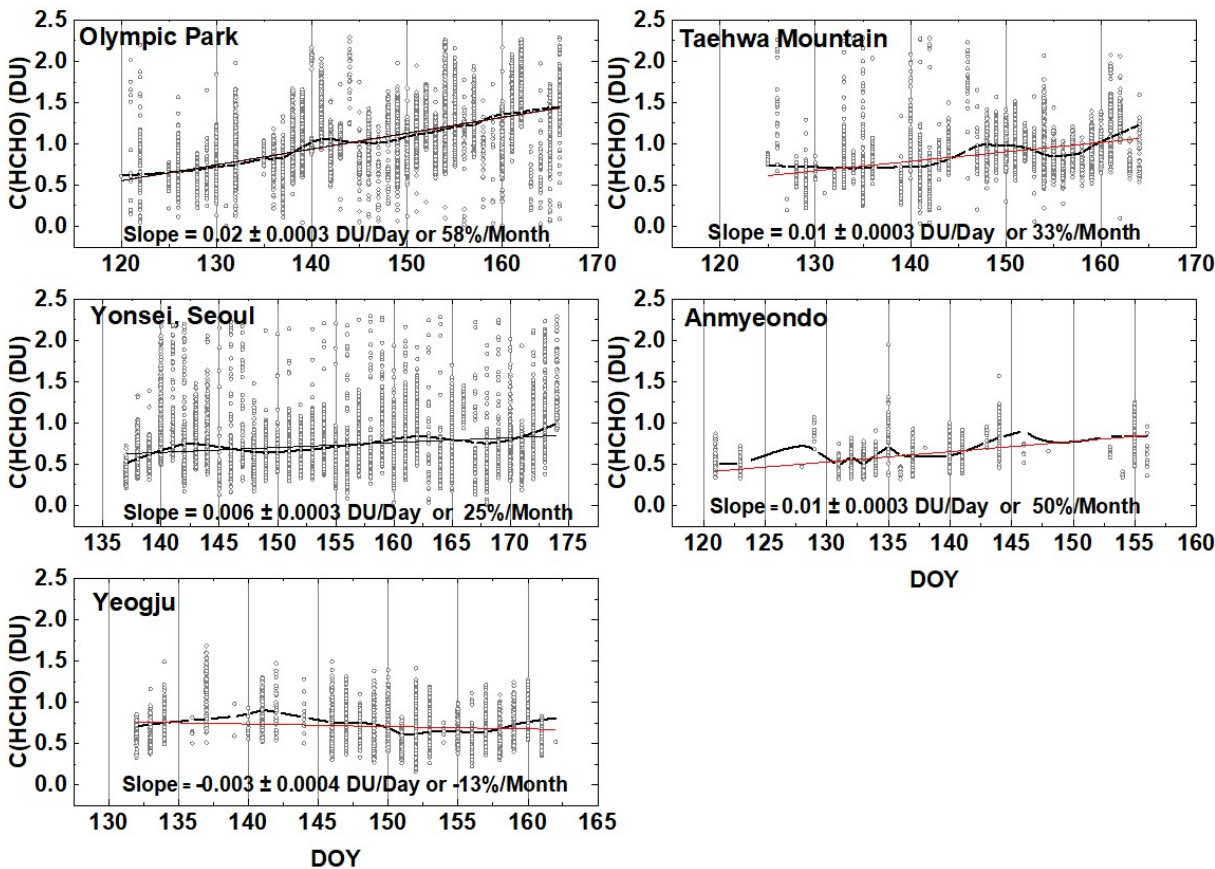

Fig. 20 The springtime change in C(HCHO) over about a 40 day period depending on the site. The “vertical bars” are the diurnal variation within each day of data. The thicker red curve is a Lowess(0.3) fit to the data, while the thin red line is a linear least squares fit. The Lowess(0.3) fit is approximately a 10-day local least-squares average.

574

575 The general intra-day C(HCHO) time dependence and C(HCHO) percent occurrence are  
 576 shown for two additional sites (Fig. 19b), Yeogju and Anmyeondo. Yeogju shows an increase in  
 577 C(HCHO) from morning to a peak value of 0.85 DU at 14:42, which then declines after 16:00. In  
 578 contrast, Anmyeondo is almost symmetric with the sun position, having a maximum of about  
 579 0.77 DU near 12:00 and 13:42 hours.

580 The average change in C(HCHO) during the spring campaign at the five sites is  
 581 summarized in Fig. 20. Of the sites, Olympic Park showed the largest change rate, 58 %/Month  
 582 followed by Anmyeondo at 50 %/Month, then Taehwa (33 %/Month), Yonsei Seoul (25  
 583 %/Month), and Yeogju (-13 %/Month). Anmyeondo tends to have lower C(HCHO) amounts

584 because of its relatively isolated coastal location. These 2-month trends include seasonal  
585 increases during the campaign months May and June, 2016.

586 It is difficult to compare PSI C(HCHO) with OMI for the KORUS-AQ period, since OMI  
587 overpass C(HCHO) data for 2016 have some missing days (Fig. 21). For days with matching  
588 data points over Seoul, PSI C(HCHO) (approximately 0.8 DU) is almost always larger than the  
589 OMI values (0.2 DU) plus a few very high PSI values and two high OMI values. The general  
590 day-to-day variations are similar.

591

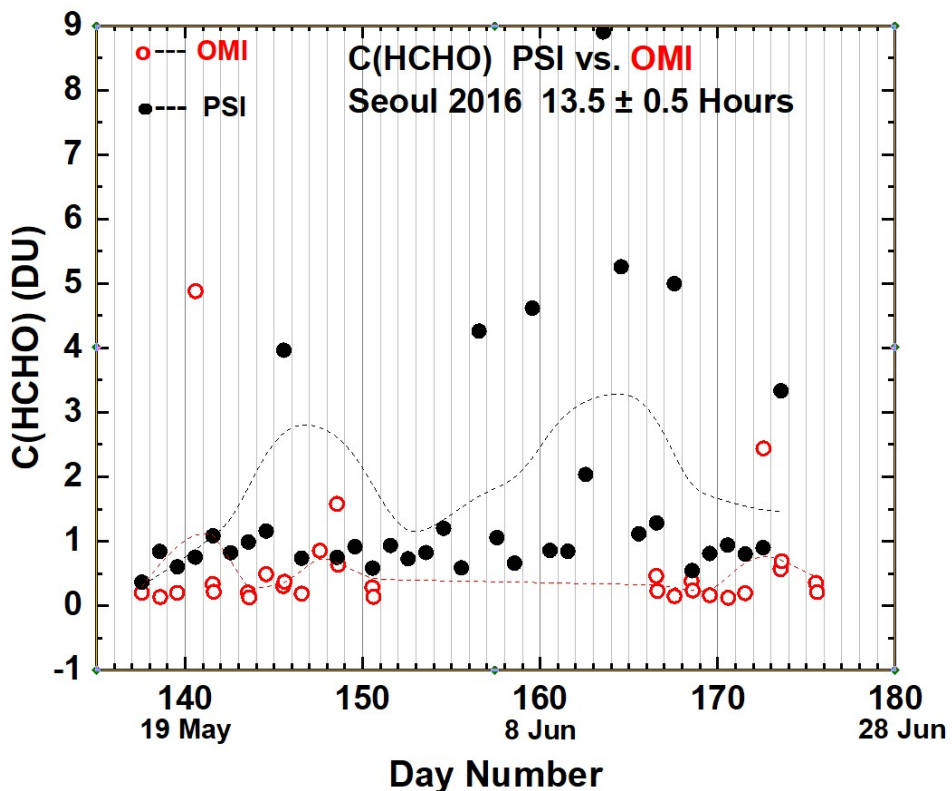

Fig. 21 Compare PSI • and OMI ◦ retrievals of C(HCHO) at  $13.5 \pm 0.5$  hours. OMI overpass data, V03, are from <https://avdc.gsfc.nasa.gov/index.php?site=1113974256&id=81>

592

593

594

595

596

597 **7 Summary**

598

599 Nine Pandora Spectrometer Instruments, PSI, were installed at 8 sites in South Korea as part of  
600 the KORUS-AQ ground, aircraft, and satellite measurements for air-quality studies. The measurements  
601 made during the months of April to June by PSI showed that are very high amounts of urban pollution  
602 from NO<sub>2</sub> and HCHO, and more moderate, but still high values in Mt Taewha and Yeogju, which are  
603 some distance from the major urban centers,. An exceptional location was Amnyeondo, which is located  
604 on a west-coastal island adjacent to the Yellow Sea about 100 km south of Seoul. The urban areas show  
605 minimum values in the morning that rise rapidly throughout the day, peaking in the late afternoon for  
606 both C(NO<sub>2</sub>) and C(HCHO).

607

608 PSI direct-sun retrieved values of C(NO<sub>2</sub>) and C(HCHO) are always larger than OMI retrieved  
609 C(NO<sub>2</sub>) and C(HCHO) for the OMI overpass times (13.5 ± 0.5 hours). In urban areas, PSI C(NO<sub>2</sub>) averages  
610 are at least a factor of two larger than OMI averages. Similar differences are seen for C(HCHO) in Seoul.  
611 However, late afternoon values measured by PSI are even larger, implying that OMI measurements  
612 underestimate the effect of poor air quality on human health. The primary cause of the OMI  
613 underestimate is the large OMI FOV that includes regions containing low values of pollutants. In  
614 relatively clean areas, PSI and OMI are more closely in agreement.

615

616 PSI retrieved C(NO<sub>2</sub>) amounts for Seoul frequently exceed 2 DU and occasionally reach 6 DU.  
617 Other urban centers in the south, Busan and Gwangju, have smaller C(NO<sub>2</sub>) amounts, but exhibit a  
618 similar strong diurnal pattern, namely low values in the morning and high values later during midday.  
619 This behavior is expected because of the large number of urban automobiles and concentrated industry.  
620 Urban areas downwind from Seoul show high C(NO<sub>2</sub>) amounts, but also show daily minimum amounts in  
621 the morning that increase later in the day. Two of the sites, Seoul and Busan, have long-term C(NO<sub>2</sub>)  
622 data records, 2012 – 2016, that suggest a gradual decrease in C(NO<sub>2</sub>) amounts in Korea. When  
623 compared with OMI, both ground-based PSI's and the 4STAR aircraft instrument onboard the DC8 show  
624 that the correlation is best for small values of C(NO<sub>2</sub>), most often seen in the troposphere and  
625 stratosphere and worst for high values that are usually in the boundary layer near their local sources. In  
626 Olympic Park, the measurements of significant values of C(HCHO) and high values of C(NO<sub>2</sub>) in the  
627 afternoon suggest that there are increased boundary layer amounts of ozone.

628

629 C(HCHO) amounts were obtained for five sites, Yonsei University in Seoul, Olympic Park, Taehwa  
630 Mtn., Amnyeondo, and Yeosu. Of these the largest amounts of C(HCHO) were observed at Olympic Park,  
631 and Taehwa Mountain, both surrounded by significant amounts of vegetation. Comparisons of PSI  
632 results were made with overflights on the DC8 aircraft for Taehwa Mtn and Olympic Park showing a  
633 significant difference in total column HCHO. In all cases, PSI measured substantially more C(HCHO) than  
634 obtained from integrating the altitude profiles measured from the DC8 overflights.

635

636 Appendix

637  
638 Figure A1 illustrates the deseasonalization of the time series in Fig.6. The left panel reproduces  
639 the solid black curve in Fig. 6A or 6C in the inset. The right panel reproduces the solid curve in Fig. 6B  
640 and is magnified in the inset. The seasonal dependence in the left panel inset is almost non-existent in  
641 the right panel inset  
642

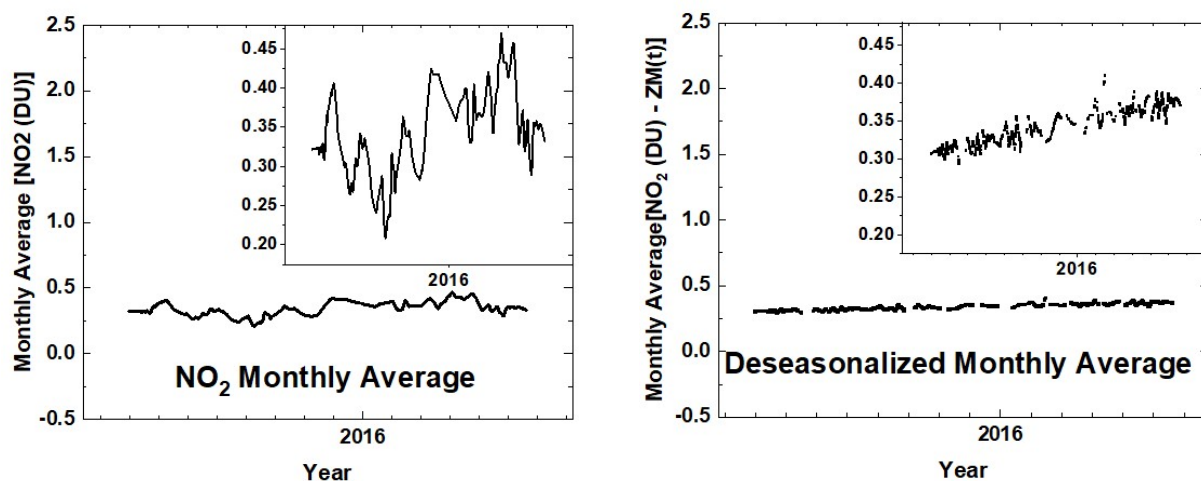

Fig. A1 An illustration of the deseasonalization (right panel) of the monthly running average of NO<sub>2</sub> for the Gwangju site (left panel) shown in Fig. 6. The insets are magnifications of the main plots.

643  
644

645

646

647 **Data Sources**

648 **OMI Formaldehyde HCHO Version 03:** <https://avdc.gsfc.nasa.gov/index.php?site=1113974256&id=81>

649 **OMI Nitrogen Dioxide NO<sub>2</sub> Version 03** <https://avdc.gsfc.nasa.gov/index.php?site=666843934&id=13>

650 **Pandora KORUS-AQ** <https://avdc.gsfc.nasa.gov/pub/DSCOVER/Pandora/DATA/KORUS-AQ/>

651

652 **Author Contributions**

653

654 Jay Herman: Wrote most of the paper and performed the analysis and comparisons with the DC-8  
655 aircraft measurements

656 Elena Spinei: Derived the formaldehyde altitude profiles suitable for comparison with Pandora data

657 Alan Fried: Obtained the HCHO profile data from the DC-8 CAMS instrument

658 Jhoon Kim: Provided support for the installation of Pandora instruments in Korea.

659 Jae Kim: Provided support for the Pandora located in Busan .

660 Woogyung Kim: Provided support in installing the Pandoras and analyzing the raw data

661 Alexander Cede: Provided calibration and data analysis support

662 Nader Abuhassan: Provided Pandora setup in Korea and provided the maintenance of calibration

663 Michal Segal-Rozenhaimer: Provided the 4STAR NO<sub>2</sub> data from the DC-8 flights and the comparison with  
664 Pandora

665

666 The authors declare that they have no conflict of interest.



667 **8 References**

- 668 Boersma, K. F., D. J. Jacob, M. Trainic, Y. Rudich, I. DeSmedt, R. Dirksen, and H. J. Eskes, Validation of  
669 urban NO<sub>2</sub> concentrations and their diurnal and seasonal variations observed from the SCIAMACHY and  
670 OMI sensors using in situ surface measurements in Israeli cities, *Atmos. Chem. Phys.*, 9, 3867–3879,  
671 2009.
- 672 Bernhard, G., C. R. Booth, and J. C. Eshamjian. Version 2 data of the National Science Foundation's  
673 ultraviolet radiation monitoring network: South Pole. *Journal of Geophysical Research (Atmospheres)*,  
674 109(D21), 2004
- 675 Cede, Alexander, Manual for Blick Software Suite1.3 Version 7, 20 Apr 2017  
676 [https://avdc.gsfc.nasa.gov/pub/DSCOVER/Pandora/Documents/BlickSoftwareSuite\\_Manual\\_v7.pdf](https://avdc.gsfc.nasa.gov/pub/DSCOVER/Pandora/Documents/BlickSoftwareSuite_Manual_v7.pdf)
- 677 Chimot, J., Vlemmix, T., Veefkind, J. P., de Haan, J. F., and Levelt, P. F.: Impact of aerosols on the OMI  
678 tropospheric NO<sub>2</sub> retrievals over industrialized regions: how accurate is the aerosol correction of cloud-  
679 free scenes via a simple cloud model?, *Atmos. Meas. Tech.*, 9, 359-382, [https://doi.org/10.5194/amt-9-](https://doi.org/10.5194/amt-9-359-2016)  
680 359-2016, 2016.
- 681 Cleveland, William S., LOWESS: A program for smoothing scatterplots by robust locally weighted  
682 regression. *The American Statistician*. 35 (1): 54. [JSTOR 2683591](https://doi.org/10.2307/2683591). [doi:10.2307/2683591](https://doi.org/10.2307/2683591), 1981.  
683
- 684 Dufour, G., F. Wittrock, M. Camredon, M. Beekmann, A. Richter, B. Aumont, and J. P. Burrows,  
685 SCIAMACHY formaldehyde observations: constraint for isoprene emission estimates over Europe?,  
686 *Atmos. Chem. Phys.*, 9, 1647–1664, 2009  
687
- 688 Dunagan, S. E., R. Johnson, J. Zavaleta, P. B. Russell, B. Schmid, C. Flynn, J. Redemann, Y. Shinzuka, J.  
689 Livingston, and M. Segal-Rosenhaimer, 4STAR spectrometer for sky-scanning Sun-tracking atmospheric  
690 research: Instrument technology, *Remote Sens. (Special Issue*  
691 "Optical Remote Sensing of the Atmosphere"), 5, 3872–3895, [doi:10.3390/rs5083872](https://doi.org/10.3390/rs5083872), 2013.
- 692 Fried, A., Walega, J. G., Olson, J. R., Crawford, J. H., Chen, G., Weibring, P., ... Millet, D. B. (2008).  
693 Formaldehyde over North America and the North Atlantic during the summer 2004 INTEX campaign:  
694 Methods, observed distributions, and measurement-model comparisons. *Journal of Geophysical*  
695 *Research*, 113(D10). <https://doi.org/10.1029/2007JD009185>, 2008.
- 696 Friedfeld, S., M. Fraser, K. Ensor, S. Tribble, D. Rehle, D. Leleux, F. Tittel Statistical analysis of primary and  
697 secondary atmospheric formaldehyde, *Atmospheric Environment*, 36, 4767-4775, 2002.
- 698 Garcia, A.R., R. Volkamer, L.T. Molina, M.J. Molina, J. Samuelson, J. Mellqvist, B. Galle, S.C. Herndon, C.E.  
699 Kolb, Separation of emitted and photochemical formaldehyde in Mexico City using a statistical analysis  
700 and a new pair of gas-phase tracers *Atmospheric Chemistry Physics*, 6, 4545-4557, 2006.
- 701 Goldberg D. et al., (2017), A High-Resolution And Observationally Constrained Omi NO<sub>2</sub> Satellite  
702 Retrieval, *Atmos. Chem. Phys. Discuss.*, [doi:10.5194/acp-2017-219](https://doi.org/10.5194/acp-2017-219), 2017.

703 Gueymard, Christian A., The sun's total and spectral irradiance for solar energy applications and solar  
704 radiation models. *Solar energy*, 76(4):423–453, 2004.

705 Herman, Jay, Alexander Cede, Elena Spinei, George Mount, Maria Tzortziou, Nader Abuhassan, NO<sub>2</sub>  
706 Column Amounts from Ground-based Pandora and MFDOAS Spectrometers using the Direct-Sun DOAS  
707 Technique: Intercomparisons and Application to OMI Validation, *J. Geophys. Res.*, 114, D13307,  
708 doi:10.1029/2009JD011848, 2009.

709 Jung, Jinsang, JaeYong Lee, ByungMoon Kim, SangHyub Oh, Seasonal variations in the NO<sub>2</sub> artifact from  
710 chemiluminescence measurements with a molybdenum converter at a suburban site in Korea  
711 (downwind of the Asian continental outflow) during 2015 - 2016, *Atmospheric Environment* 165, 290-  
712 300, 2017.

713 Kanaya, Y., Irie, H., Takashima, H., Iwabuchi, H., Akimoto, H., Sudo, K., Gu, M., Chong, J., Kim, Y. J., Lee,  
714 H., Li, A., Si, F., Xu, J., Xie, P.-H., Liu, W.-Q., Dzhola, A., Postlyakov, O., Ivanov, V., Grechko, E.,  
715 Terpugova, S., and Panchenko, M.: Long-term MAX-DOAS network observations of NO<sub>2</sub> in Russia and  
716 Asia (MADRAS) during the period 2007–2012: instrumentation, elucidation of climatology, and  
717 comparisons with OMI satellite observations and global model simulations, *Atmos. Chem. Phys.*, 14,  
718 7909-7927, <https://doi.org/10.5194/acp-14-7909-2014>, 2014.

719 Kim, Na Kyung, Yong Pyo Kim, Yu Morino, Jun-ichi Kurokawa, Toshimasa Ohara, Verification of NO<sub>x</sub>  
720 emission inventory over South Korea using sectoral activity data and satellite observation of NO<sub>2</sub> vertical  
721 column densities, *Atmospheric Environment* , 77, 496-508, 2013.

722 Kim, Daewon, Hanlim Lee, Hyunkee Hong, Wonei Choi, Yun Gon Lee and Junsung Park, Estimation of  
723 Surface NO<sub>2</sub> Volume Mixing Ratio in Four Metropolitan Cities in Korea Using Multiple Regression Models  
724 with OMI and AIRS Data, *Remote Sens.* 2017, 9, 627; doi:10.3390/rs9060627, 2017.

725 Krafta, Martin, Thomas Eikmannb, Andreas Kapposc, Nino Künzlid, Regula Rappe, Klaus Schneiderf,  
726 Heike Seitzb, Jens-Uwe Voss, H.-Erich Wichmannh, The German view: Effects of nitrogen dioxide on  
727 human health – derivation of health-related short-term and long-term values, *International Journal of*  
728 *Hygiene and Environmental Health*, 208, 305–318, 2005.

729 Kramer, L.J., R. J. Leigh, J. J. Remedios, et al., “Comparison of OMI and Ground-Based in situ and  
730 MAXDOAS Measurements of Tropospheric Nitrogen Dioxide in An Urban Area,” *J. Geophys. Res.* **113**,  
731 D16S39, 2008.

732 Kurucz. Robert L ., New atlases for solar flux, irradiance, central intensity, and limb intensity. *Memorie*  
733 *della Societa Astronomica Italiana Supplementi*, 8:189, 2005.

734 Latza, Ute, , Silke Gerdes, and Xaver Baur, Effects of nitrogen dioxide on human health: Systematic review  
735 of experimental and epidemiological studies conducted between 2002 and 2006, *International Journal*  
736 *of Hygiene and Environmental Health* 212, Pages 271 - 287, doi.org/10.1016/j.ijheh.2008.06.003, 2009.

737 Lee, Grem, Hye-Ryun Oh, Chang-Hoi Ho, Jinwon Kim, Chang-Keun Song, Lim-Seok Chang, Jae-Bum Lee,  
738 Seungmin Lee, Airborne Measurements of High Pollutant Concentration Events in the Free Troposphere  
739 over the West Coast of South Korea between 1997 and 2011, *Aerosol and Air Quality Research*, 16,  
740 1118–1130, 2016.

741 Lei, W., Zavala, M., de Foy, B., Volkamer, R., Molina, M. J., and Molina, L. T.: Impact of primary  
742 formaldehyde on air pollution in the Mexico City Metropolitan Area, *Atmos. Chem. Phys.*, 9, 2607–2618,  
743 2009.

744 Liteplo, R.G., R. Beauchamp, M.E. Meek, and R. Chénier. Formaldehyde. Geneva: International  
745 Programme on Chemical Safety; 2002. [18 May 2010]. (Concise International Chemical Assessment  
746 Document 40) (<http://www.inchem.org/documents/cicads/cicads/cicad40.htm>).

747 Luecken, D.J., W.T. Hutzell, M.L. Strum, G.A. Pouliot, Regional sources of atmospheric formaldehyde and  
748 acetaldehyde, and implications for atmospheric modeling, *Atmospheric Environment* 47, 477-490,  
749 doi:10.1016/j.atmosenv.2011.10.005, 2012.

750 Meller, Richard, and Geert K Moortgat. Temperature dependence of the absorption cross sections of  
751 formaldehyde between 223 and 323 k in the wavelength range 225-375 nm. *Journal of Geophysical*  
752 *Research: Atmospheres* (19842012), 105(D6):70897101, 2000.

753

754 Park. Junsung, Hanlim Lee, Jhoon Kim, Jay Herman, Woogyung Kim, Hyunkee Hong, Wonei Choi,  
755 Jiwon Yang and Daewon Kim, HCHO column density retrieval using Pandora measurements in Seoul,  
756 Korea: Temporal characteristics and comparison with OMI measurement, *Remote Sens.*, 10, 173;  
757 doi:10.3390/rs10020173, 2018.

758

759 Platt, U., D. Perner, and H. W. Pätz, Simultaneous measurements of atmospheric CH<sub>2</sub>, O<sub>3</sub> and NO<sub>2</sub> by  
760 differential optical absorption, *J. Geophys. Res.* 84 (1979), 6329–6335, 1979.

761

762 Platt, U. Differential optical absorption spectroscopy (DOAS), *Air monitoring by Spectroscopic Techniques*  
763 (M. Sigrist, ed.), John Wiley & Sons, Inc., 1994, pp. 27–84. [6] U. Platt, D. Perner, and H. W. Pätz,  
764 Simultaneous measurements of atmospheric CH<sub>2</sub>, O<sub>3</sub> and NO<sub>2</sub> by differential optical absorption, *J.*  
765 *Geophys. Res.* 84 (1979), 6329–6335, 1994.

766

767 Richter D., P. Weibring, J. G. Walega, A. Fried, S. M. Spuler, M. S. Taubman: Compact highly sensitive  
768 multi-species airborne mid-IR spectrometer, *Appl. Phys. B*, doi: 10.1007/s00340-015-6038-8, 2015.

769 Russell, A. R., Perring, A. E., Valin, L. C., Bucsela, E. J., Browne, E. C., Wooldridge, P. J., and Cohen, R. C.: A  
770 high spatial resolution retrieval of NO<sub>2</sub> column densities from OMI: method and evaluation, *Atmos.*  
771 *Chem. Phys.*, 11, 8543-8554, 2011.

772 Segal-Rosenheimer, M., P. B. Russell, B. Schmid, J. Redemann, J. M. Livingston, C. J. Flynn, R. R. Johnson,  
773 S. E. Dunagan, Y. Shinozuka<sup>1</sup>, J. Herman, A. Cede, N. Abuhassan, J. M. Comstock, J. M. Hubbe, A.  
774 Zelenyuk<sup>3</sup>, and J. Wilson, (2014) Tracking elevated pollution layers with a newly developed

775 hyperspectral Sun/Sky spectrometer(4STAR): Results from the TCAP 2012 and 2013 campaigns, J.  
776 Geophys. Res. Atmos., 119, 2611–2628, doi:10.1002/2013JD020884, 2014.

777 Shinozuka, Y., et al. , Hyperspectral aerosol optical depths from TCAP flights, J. Geophys. Res. Atmos.,  
778 118, 12,180–12,194, doi:10.1002/2013JD020596, 2013.

779 Spinei, E., N. Abuhassan, A Cede, M. Tiefengraber, M. Mueller, J. Herman, N. Nowak, B. Poche, S. Choi,  
780 A. Whitehill, J. Szykman, V. Lukas, D. Williams, R. Long, Jin Liao, Jason St. Clair, Glenn Wolfe, Thomas  
781 Hanisco, Changmin Cho, Alan Fried, Petter Weibring, Dirk Richter, Robert Swap, James Walega, Pandora  
782 formaldehyde measurements during KORUS-AQ over Olympic Park and Taehwa (South Korea, April-June  
783 2016), (submitted to AMT), 2018.

784 Thuillier, G., L. Floyd, T.N. Woods, R. Cebula, E. Hilsenrath, M. Hersé, and D. Labs. Solar irradiance  
785 reference spectra for two solar active levels. *Advances in Space Research*, 34(2):256–261, 2004.

786 Vandaele, A.C., C. Hermans, P. C. Simon, M. Carleer, R. Colin, S. Fally, M. F. Mérienne, A. Jenouvrier, and  
787 B. Coquart. Measurements of the NO<sub>2</sub> absorption cross-section from 42,000 cm<sup>-1</sup> to 10,000 cm<sup>-1</sup> (238-  
788 1000 nm) at 220 K and 294 K. *Journal of Quantitative Spectroscopy and Radiative Transfer*, 59: 171–184,  
789 doi: 10.1016/S0022-4073(97)00168-4, 1998.

790 VanHoosier, Michael E. Solar ultraviolet spectral irradiance data with increased wavelength and  
791 irradiance accuracy. In SPIE's 1996 International Symposium on Optical Science, Engineering, and  
792 Instrumentation, pages 57–64. International Society for Optics and Photonics, 1996.

793 Walters, Wendell & Goodwin, Stanford & Michalski, Greg. (2015). The Nitrogen Stable Isotope  
794 Composition ( $\delta^{15}\text{N}$ ) of Vehicle Emitted NO<sub>x</sub>. *Environmental science & technology*. 49.  
795 10.1021/es505580v, 2015.

796 Zhang, Hongliang, Jingyi Li, Qi Ying, Birnur Buzcu Guven, and Eduardo P. Olaguer, Source apportionment  
797 of formaldehyde during TexAQS 2006 using a source-oriented chemical transport model, *J. Geophys.*  
798 *Res.*, 118, 1525–1535, doi:10.1002/jgrd.50197, 2013.

799 Zhu, Lei, Daniel J. Jacob, Frank N. Keutsch, Loretta J. Mickley, Richard Scheffe, Madeleine Strum, Gonzalo  
800 González Abad, Kelly Chance, Kai Yang, Bernhard Rappenglück, Dylan B. Millet, Munkhbayar Baasandorj,  
801 Lyatt Jaeglé, and Viral Shah, Formaldehyde (HCHO) As a Hazardous Air Pollutant: Mapping Surface Air  
802 Concentrations from Satellite and Inferring Cancer Risks in the United States, *Environmental Science &*  
803 *Technology* 51 (10), 5650-5657, DOI: 10.1021/acs.est.7b01356, 2017.

804

805

806

807

808 Acknowledgement

809 The author would like to thank the Pandora project for support in completing this study as well as  
810 financial support from the KORUS-AQ project NNH15ZDA001N-KORUS. Dr. Jae Kim and Dr. Jhoon  
811 Kim are supported by Korea Ministry of Environment as Public Technology Program based on  
812 Environmental Policy (2017000160001). All data is available from a NASA data repository:  
813 <https://avdc.gsfc.nasa.gov/pub/DSCOVER/Pandora/DATA/KORUS-AQ/>

814

815

816 **Tables**

Table 1 KORUS-AQ Locations (South to North)

| Locations    | Alt(m) | Latitude | Longitude |
|--------------|--------|----------|-----------|
| Gwangju      | 33     | 35.2260N | 126.8430W |
| Busan        | 228    | 35.2353N | 129.0825W |
| Anmyeondo    | 41     | 36.5380N | 126.3300W |
| Taehwa Mtn   | 160    | 37.3123N | 127.3106W |
| Yeoju-1 & 2  | 90     | 37.3385N | 127.4895W |
| Songchon     | 49     | 37.4100N | 127.5600W |
| Olympic Park | 26     | 37.5232N | 127.1260W |
| Seoul        | 181    | 37.5644N | 126.9340W |

817

818

Table 2 Taehwa Mtn DC8 compared to PSI measurements in Fig. 18

| Date   | LT       | DC8 HCHO DU | PSI HCHO | Percent |
|--------|----------|-------------|----------|---------|
| 11 May | 08:25:19 | 0.4         | 0.6      | 67      |
| 18 May | 08:34:26 | 0.4         | 0.5      | 80      |
| 30 May | 12:05:00 | 0.5         | 0.9      | 56      |
| 10 Jun | 08:22:45 | 1           | 1.16     | 86      |
| 10 Jun | 12:22:53 | 1           | 1.5      | 67      |
| 10 Jun | 15:46:03 | 1           | 1.3      | 77      |

819

820

821 **Figure Captions**

822 **Fig. 1** KORUS-AQ sites for 9 Pandora instruments at 8 sites.

823 **Fig. 2a**  $C(NO_2)$  amounts from Pandora 27 and 35 in Yeosu, Korea during 3 June 2016 and their difference  
824  $|Pan35 - Pan27| < 0.05$  DU.

825 **Fig. 2b** Pandora 35 estimate of cloud or aerosol reduced measured counts/second at approximately 500  
826 nm.

827 Fig. 3. Frequency distributions of  $C(NO_2)$  across the KORUS-AQ PSI network: April 20 to Jun 6 2016,  
828 except as labelled. The axes vary for different sites.

829 Fig. 4  $NO_2$  time series vs day of the year (DOY) and diurnal variability (daily vertical extent) at 9 Pandora  
830 sites. Notice the very high  $NO_2$  amounts in Seoul and nearby Olympic Park. The black curves are  
831 approximately weekly least squares running averages. Note: the vertical scales are different for each site  
832 to show the daily variability relative to the running average.

833 Fig. 5  $NO_2$  amounts vs Day of the Year (DOY) and Local Time for six sites as labeled in each panel. Day  
834 120=April 29, Day 130=May 9, Day 140=May 19, Day 150=May 29, Day 160=June 8, Day 170 =June18.

**Fig. 6** Approximately 1 year of daily column  $C(NO_2)$  amount data (Panels A and D) and the monthly  
running average amount (dark plot in Panels A and D). The data are from GIST at Gwangju and  
Amnyeondo. Panels A and D are the original time series with one data point every 80 seconds, panels B  
and E are the deseasonalized time series. Panels C and F are an expanded scale of the monthly running  
averages  $M(t)$  of  $C(NO_2)$  that are identical to the solid lines in panels A and D. The vertical extent (panels  
A, B, D, and E) on a given day is the range of diurnal variation from early morning to late afternoon.

835 Fig. 7 (A)  $NO_2$  time series at Yonsei University in Seoul  $NO_2$ (grey) and (B) deseasonalized time series.  
836 Combined slope =  $-0.05 \pm 0.001$  DU/Year and Mean =  $1.2 \pm 0.8$  DU or the decrease is  $-4 \pm 0.08$  % / Year.  
837 Seoul has no clear seasonal cycle.

838 Fig. 8 (A) Pusan University in Busan  $NO_2$  daily time series (grey) and (B) deseasonalized time series with  
839 linear trends.

840 Fig. 9a Comparisons between the daily values of  $C(NO_2)$  for OMI (black) and PSI (red) at Seoul and Busan  
841 for a 5-year period. Solid lines show the average seasonal variation (Lowess(0.1)), see also Fig. 9b. **Linear**  
842 **interpolation is used where there are missing data points.**

843 Fig. 9b Comparisons between the seasonal averages for  $C(NO_2)$  from OMI (black) and PSI (red) at Seoul  
844 and Busan for a 5-year period. The lower panels show the seasonal difference between the PSI and  
845 OMI. **The individual data points are shown derived from a Lowess(0.1) smoothing, approximately a 3-**  
846 **month running averages of the daily data. Interpolation has been used where there are missing data**  
847 **points.**

848 Fig. 10 C(NO<sub>2</sub>) time series from Pandora (red) and OMI (black) for GIST University in Gwangju Korea and  
849 their differences. The comparison is formed from time coincidences between Pandora and OMI.

850 Fig. 11 A correlation plot of C(NO<sub>2</sub>) from 4STAR onboard the DC-8 compared to the C(NO<sub>2</sub>) amount  
851 measured by the PSI at Olympic Park on nine different days. The solid black line is the 1:1 line drawn for  
852 reference. The dashed line represents the data linear fit, with a slope of 1.05, and a correlation  
853 coefficient  $r^2 = 0.7$ , as shown on the plot.

854 Fig. 12 C(HCHO) from PSI at Olympic Park for 6 days in June 2016. C(HCHO) on 2 June 2016 has a peak  
855 value of 2.3 DU at 14:30 hours.

856 Fig. 13 Pandora measured formaldehyde amounts vs day of the year and local time for 29 April 2016 to  
857 11 June 2016 in Olympic Park.

858 Fig. 14 HCHO altitude profile measured onboard the DC8 on 4 May at 07:54 (A) and 11:54 (B) local time  
859 over Olympic Park, Korea. Panel C: PSI measurements of total column HCHO. Vertical bars mark the DC8  
860 flight duration for the profiles yielding altitude integrated column amounts of 0.38 and 0.26 DU.

861 Fig. 15 DC-8 HCHO measurements over Olympic Park on June 4. The continuous blue profiles  
862 show the 1-second HCHO data while the black points with error bars show the 10-second  
863 average and standard deviation of this data at points of closest approach above the Olympic  
864 Park site.

865 Fig. 16 HCHO altitude profile measured onboard the DC8 on 5 June at 8:30 (A) and 15:21 (B) local time  
866 over Olympic Park, Korea. Panel C: PSI measurements of total column HCHO. Vertical bars mark the DC8  
867 flight duration for the profiles yielding column amounts of 0.60 and 0.82 DU.

868 Fig. 17 Total column HCHO from Pandora Yonsei University, Seoul for 6 days in June 2016. HCHO on 2  
869 June 2016 has a peak value of 1.2 DU at 13:30 hours.

870 Fig. 18 Total column HCHO from Pandora Taehwa Mountain for 6 days in June 2016. HCHO on 2 June  
871 2016 has a peak value of 1.2 DU at 12:45. ▲ are DC8 measurements on 10 June.

872 Fig. 19a Summary of total column HCHO for the stated dates during the KORUS-AQ campaign. The solid  
873 line is a Lowess(0.1) fit to the data. The sharp cutoffs in panel A, B, and C were caused obstructions of  
874 the direct sun from the PSI FOV in the afternoon.

875 Fig. 19b Summary of total column HCHO for the stated dates during the KORUS-AQ campaign. Panels A  
876 and B represent the daily variation at a given local time. The solid line is a Lowess(0.1) fit to the data.  
877 Panels C and D show the frequency of occurrence (%) for different amounts of HCHO.

878 Fig. 20 The springtime change in C(HCHO) over about a 40 day period depending on the site.  
879 The “vertical bars” are the diurnal variation within each day of data. The thicker red curve is a  
880 Lowess(0.3) fit to the data, while the thin red line is a linear least squares fit. The Lowess(0.3) fit  
881 is approximately a 10-day local least-squares average.



882 Fig. 21 Compare PSI • and OMI o retrievals of C(HCHO) at  $13.5 \pm 0.5$  hours. OMI overpass data, V03, are  
883 from <https://avdc.gsfc.nasa.gov/index.php?site=1113974256&id=81>

884 Fig. A1 An illustration of the deseasonalization (right panel) of the monthly running average of  $\text{NO}_2$  for  
885 the Gwangju site (left panel) shown in Fig. 6. The insets are magnifications of the main plots.

886

887

888 Figures

889

890

891

892

893

894

895

896

897

898

899

900

901

902

903

904

905

906

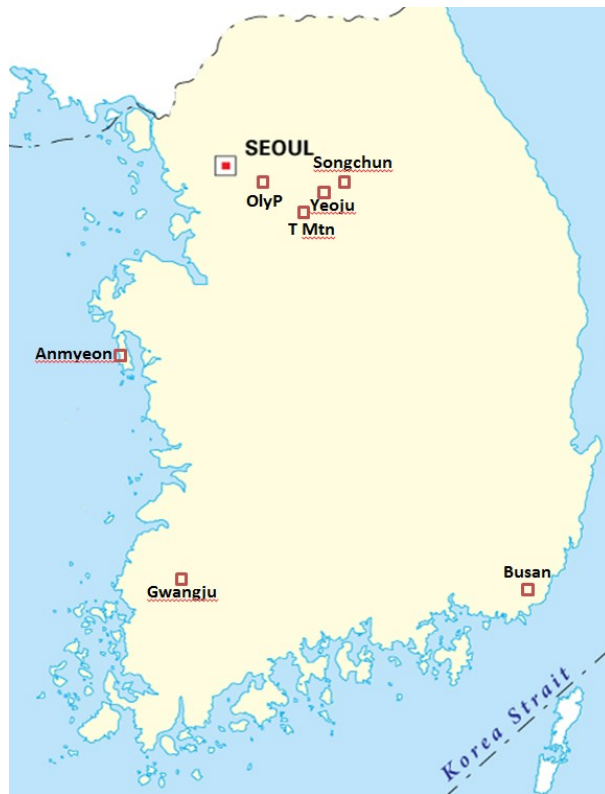

**Fig. 1** KORUS-AQ sites for 9 Pandora instruments at 8 sites.

**F01**

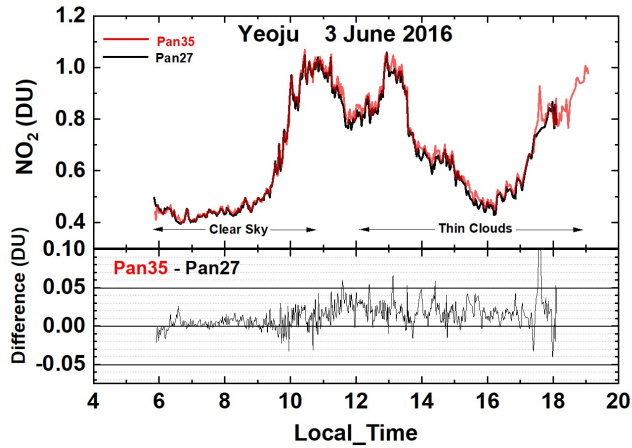

Fig. 2a  $C(\text{NO}_2)$  amounts from Pandora 27 and 35 in Yeosu, Korea during 3 June 2016 and their difference  $|\text{Pan35} - \text{Pan27}| < 0.05 \text{ DU}$ .

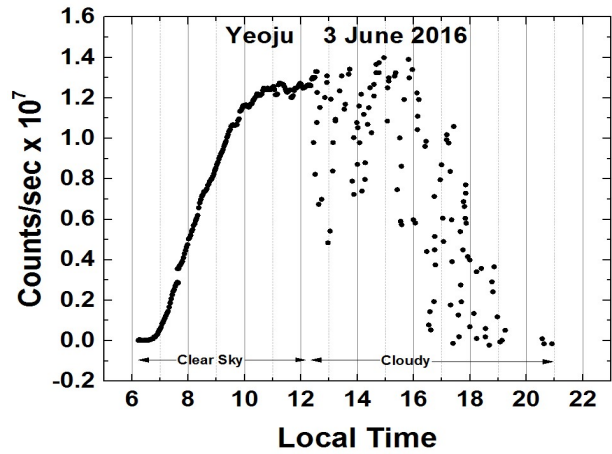

Fig. 2b Pandora 35 estimate of cloud or aerosol reduced measured counts/second at approximately 500 nm.

907

908 **F02**

909

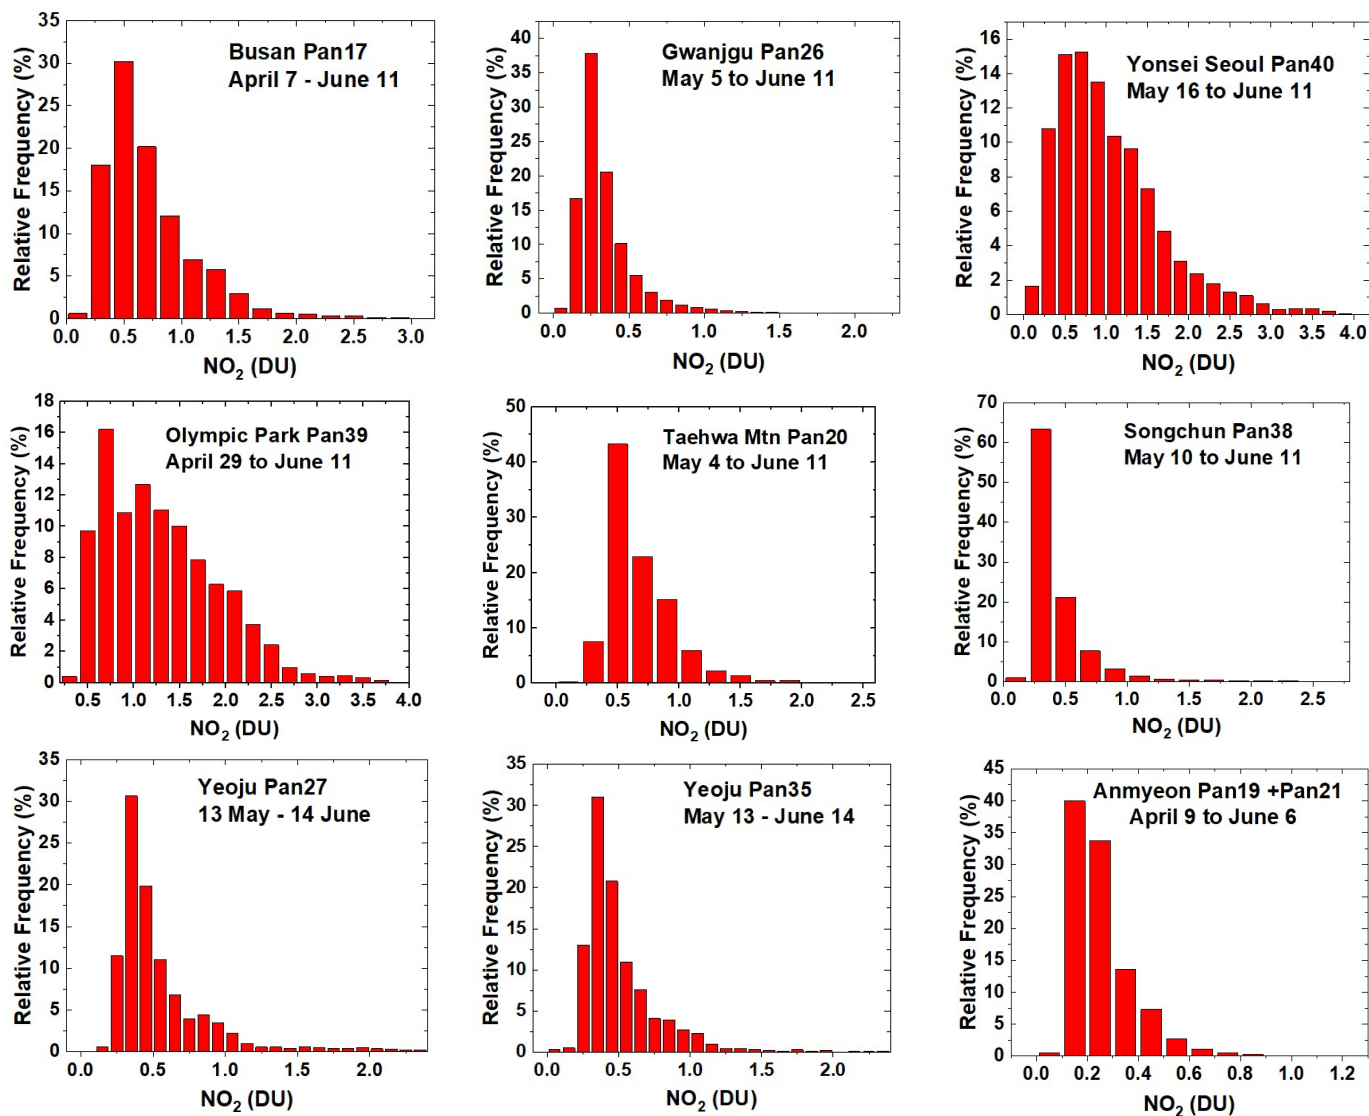

Fig. 3. Frequency distributions of  $C(\text{NO}_2)$  across the KORUS-AQ PSI network: April 20 to Jun 6 2016, except as labelled. The axes vary for different sites.

910

911 **F03**

912

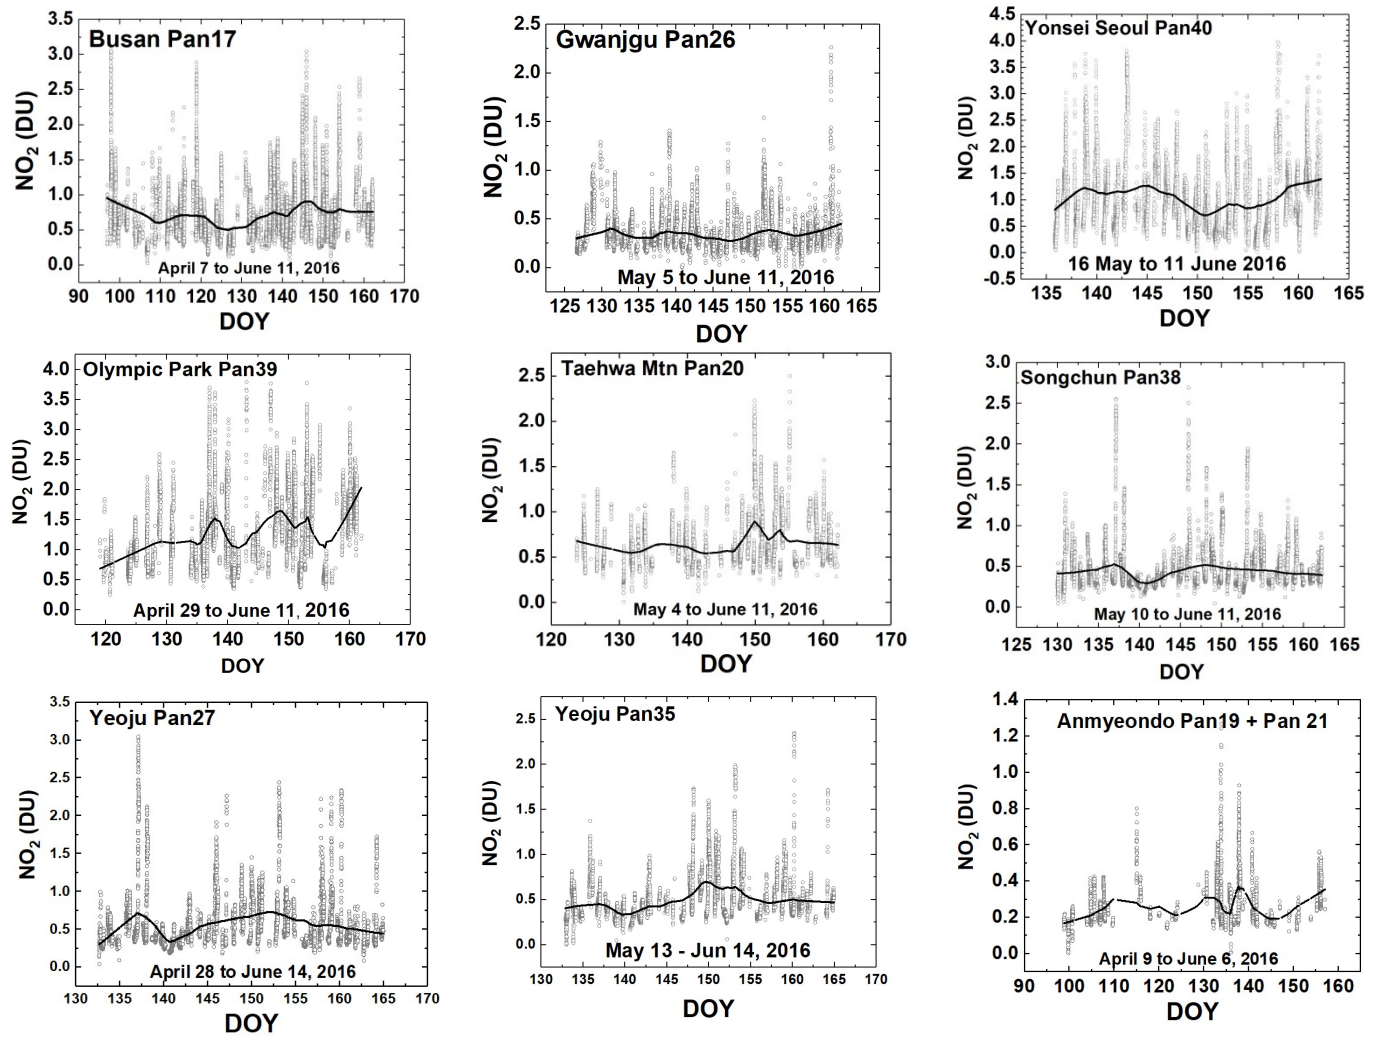

Fig. 4 NO<sub>2</sub> time series vs day of the year (DOY) and diurnal variability (daily vertical extent) at 9 Pandora sites. Notice the very high NO<sub>2</sub> amounts in Seoul and nearby Olympic Park. The black curves are approximately weekly least squares running averages. The daily vertical extent corresponds to diurnal variation (Fig. 2). Note: the vertical scales are different for each site to show the daily variability relative to the running average.

913

914 **F04**

915



Fig. 5 NO<sub>2</sub> amounts vs Day of the Year (DOY) and Local Time for six sites as labeled in each panel. Day 120=April 29, Day 130=May 9, Day 140=May 19, Day 150=May 29, Day 160=June 8, Day 170 =June18.

916

917 **F05**

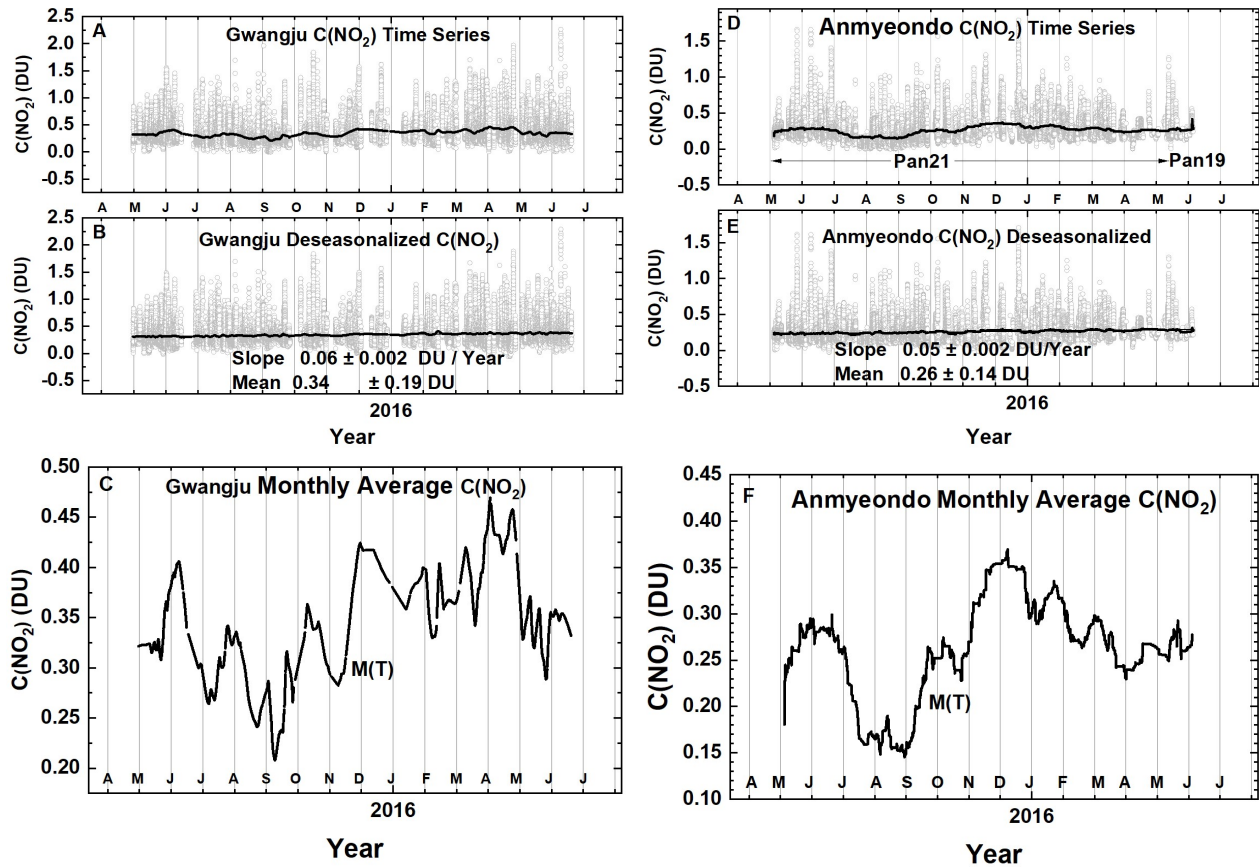

Fig. 6 Approximately 1 year of daily column  $C(\text{NO}_2)$  amount data (Panels A and D) and the monthly running average amount (dark plot in Panels A and D). The data are from GIST at Gwangju and Anmyeondo. Panels A and D are the original time series with one data point every 80 seconds, panels B and E are the deseasonalized time series. Panels C and F are an expanded scale of the monthly running averages  $M(t)$  of  $C(\text{NO}_2)$  that are identical to the solid lines in panels A and D. The vertical extent (panels A, B, D, and E) on a given day is the range of diurnal variation from early morning to late afternoon.

918

919

920 **F06**

921

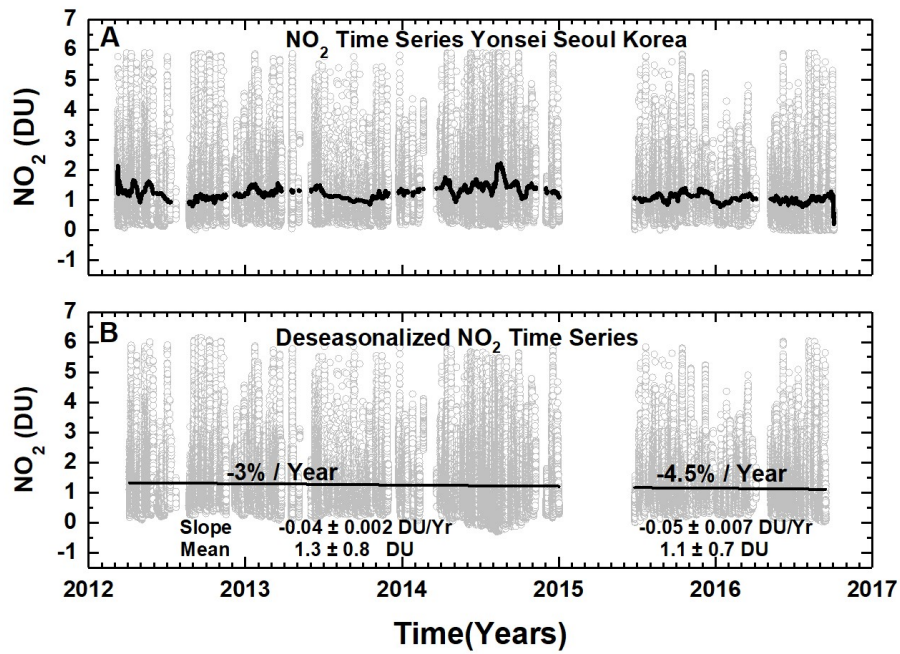

Fig. 7 (A) NO<sub>2</sub> time series at Yonsei University in Seoul NO<sub>2</sub>(grey) and (B) deseasonalized time series. Combined slope =  $-0.05 \pm 0.001$  DU/Year and Mean =  $1.2 \pm 0.8$  DU or the decrease is  $-4 \pm 0.08$  % / Year. Seoul has no clear seasonal cycle.

922

923 **F07**

924



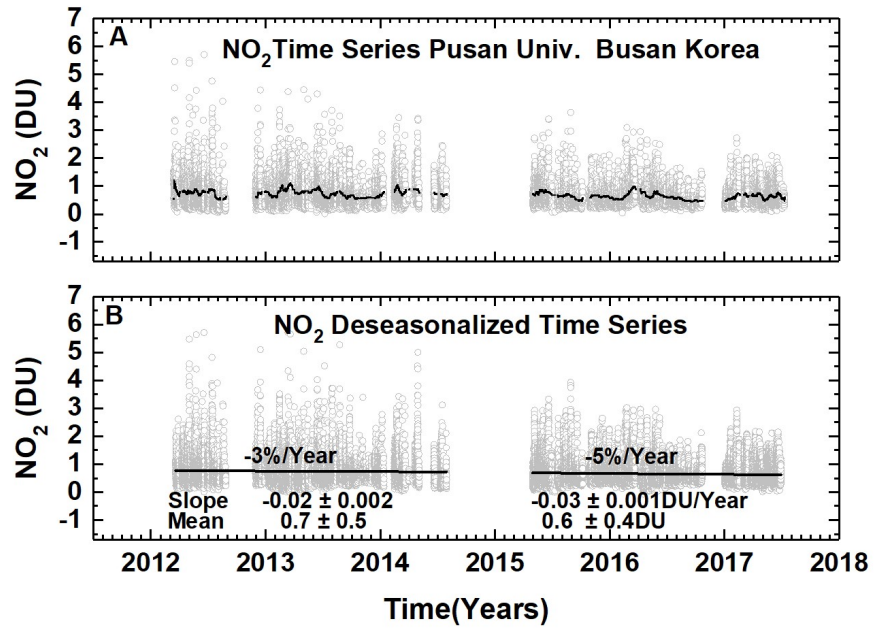

Fig. 8 (A) Pusan University in Busan NO<sub>2</sub> daily time series (grey) and (B) deseasonalized time series with linear trends.

925

926 **F08**

927

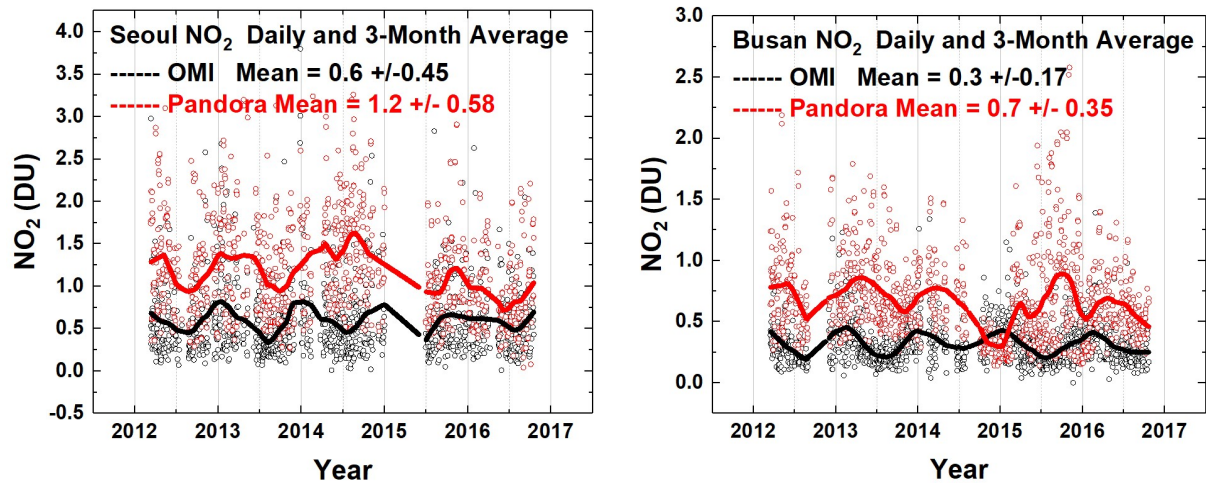

Fig. 9a Comparisons between the daily values of C(NO<sub>2</sub>) for OMI (black) and PSI (red) at Seoul and Busan for a 5-year period. Solid lines show the average seasonal variation (Lowess(0.1)), see also Fig. 9b. Linear interpolation is used where there are missing data points.

928

929 **F09a**

930

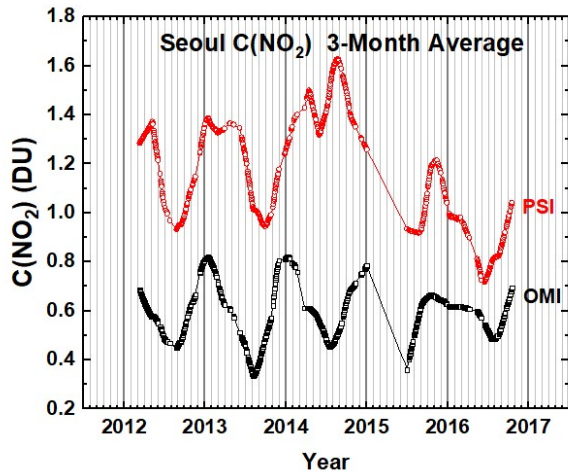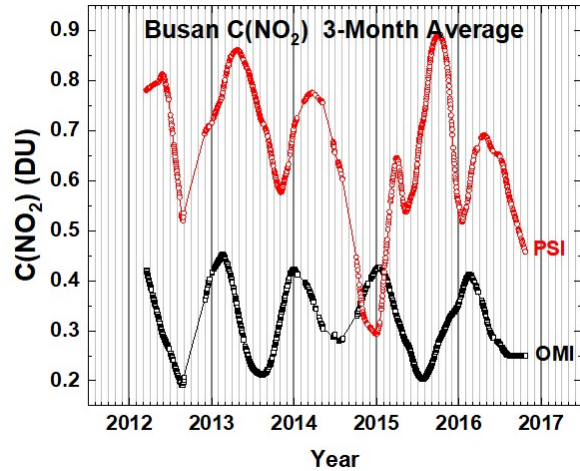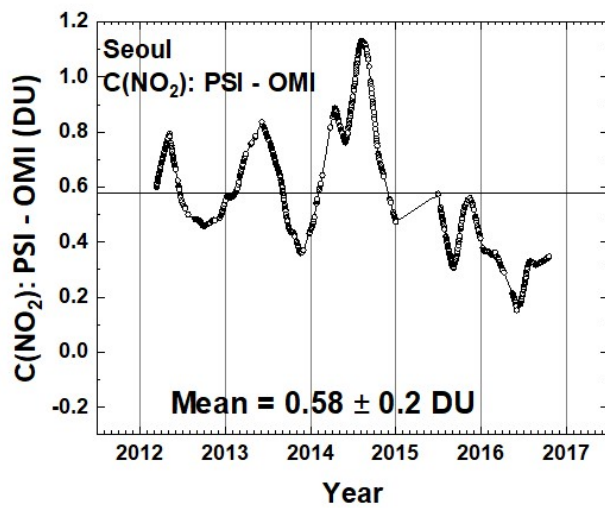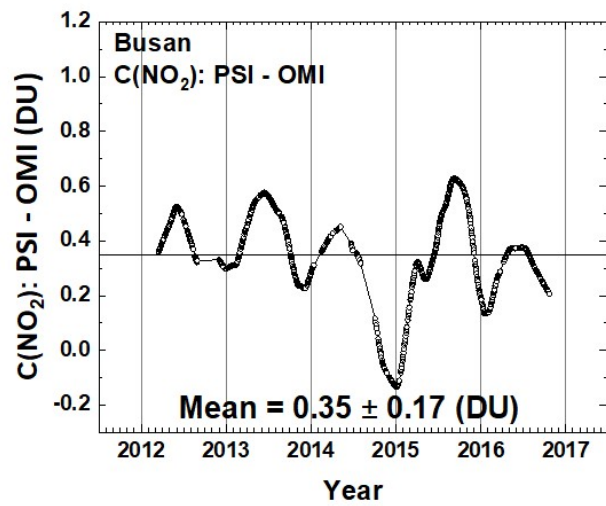

Fig. 9b Comparisons between the seasonal averages for C(NO<sub>2</sub>) from OMI (black) and PSI (red) at Seoul and Busan for a 5-year period. The lower panels show the seasonal difference between the PSI and OMI. The individual data points are shown derived from a Lowess(0.1) smoothing, approximately a 3-month running averages of the daily data. Interpolation has been used where there are missing data points.

931

932 **F09b**

933

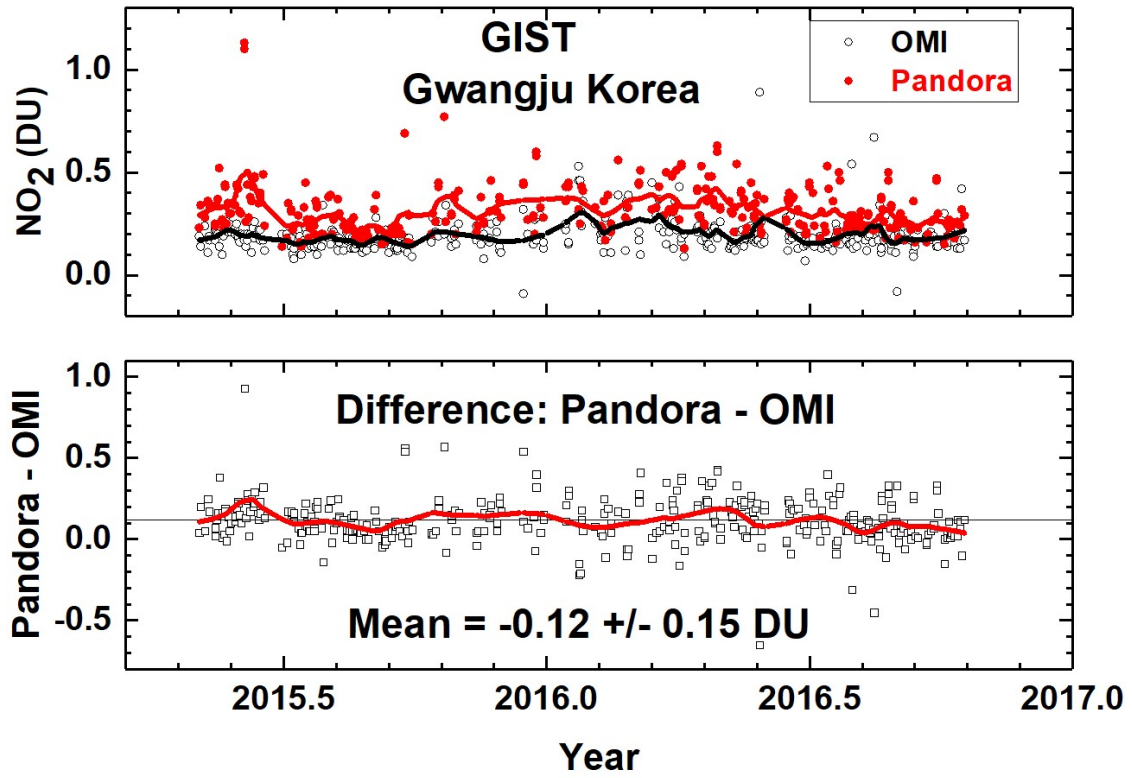

Fig. 10 C(NO<sub>2</sub>) time series from Pandora (red) and OMI (black) for GIST University in Gwangju Korea and their differences. The comparison is formed from time coincidences between Pandora and OMI.

934

935 **F10**

936

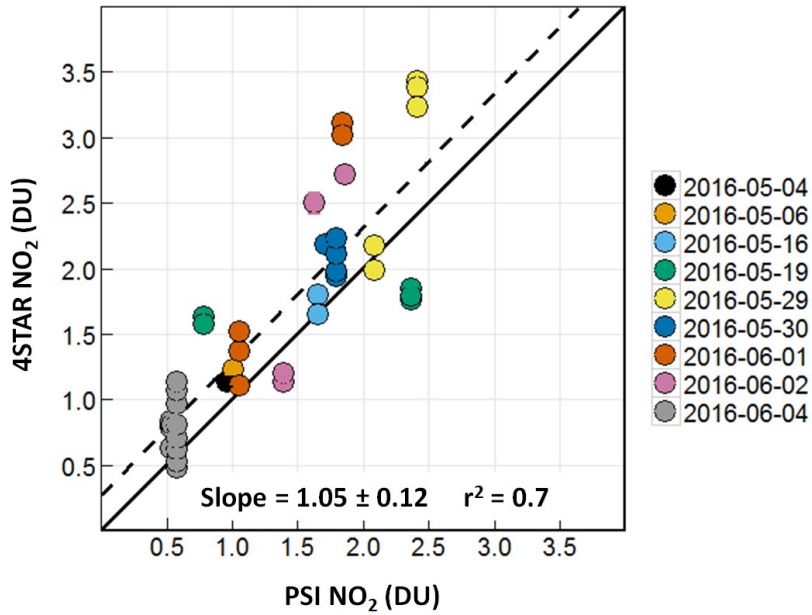

Fig. 11 A correlation plot of C(NO<sub>2</sub>) from 4STAR onboard the DC-8 compared to the C(NO<sub>2</sub>) amount measured by the PSI at Olympic Park on nine different days. The solid black line is the 1:1 line drawn for reference. The dashed line represents the data linear fit, with a slope of 1.05, and a correlation coefficient  $r^2 = 0.7$ , as shown on the plot.

937

938 **F11**

939

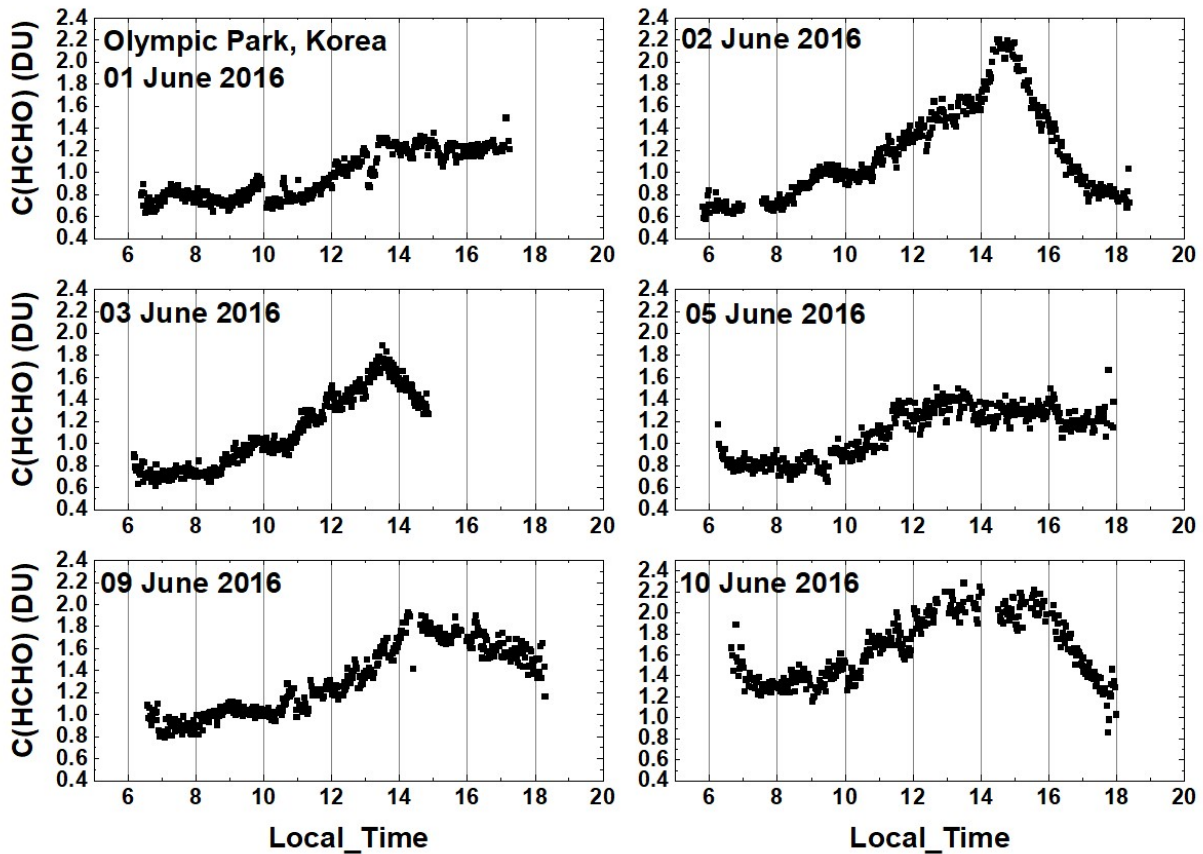

Fig. 12 C(HCHO) from PSI at Olympic Park for 6 days in June 2016. C(HCHO) on 2 June 2016 has a peak value of 2.3 DU at 14:30 hours.

940

941 **F12**

942

943

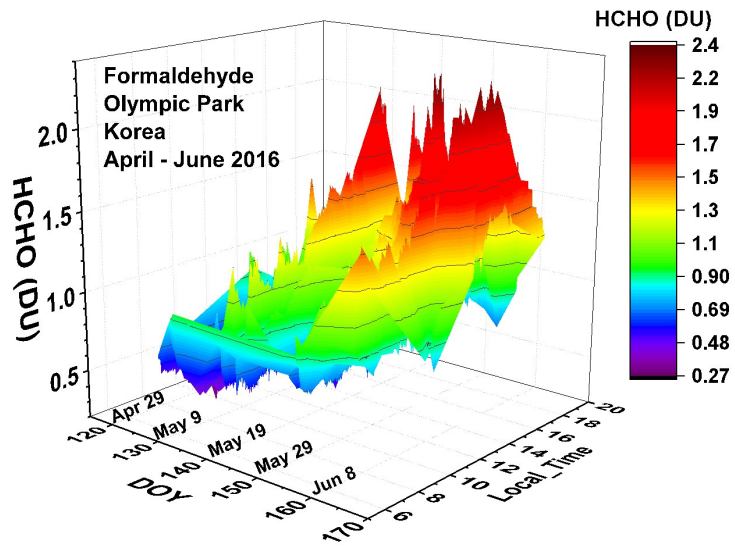

Fig. 13 Pandora measured formaldehyde amounts vs day of the year and local time for 29 April 2016 to 11 June 2016 in Olympic Park.

944

945 **F13**

946

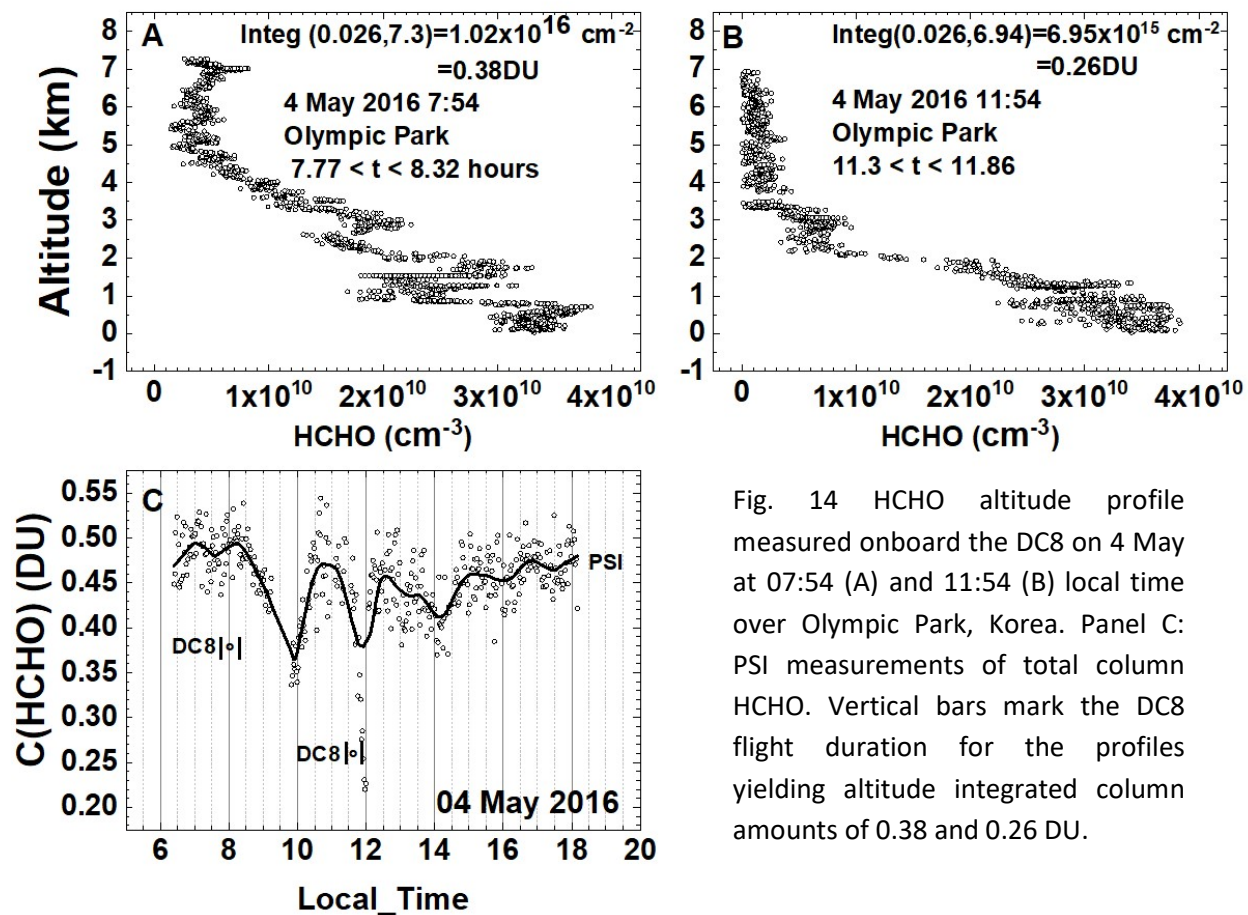

Fig. 14 HCHO altitude profile measured onboard the DC8 on 4 May at 07:54 (A) and 11:54 (B) local time over Olympic Park, Korea. Panel C: PSI measurements of total column HCHO. Vertical bars mark the DC8 flight duration for the profiles yielding altitude integrated column amounts of 0.38 and 0.26 DU.

947

948 **F14**

949



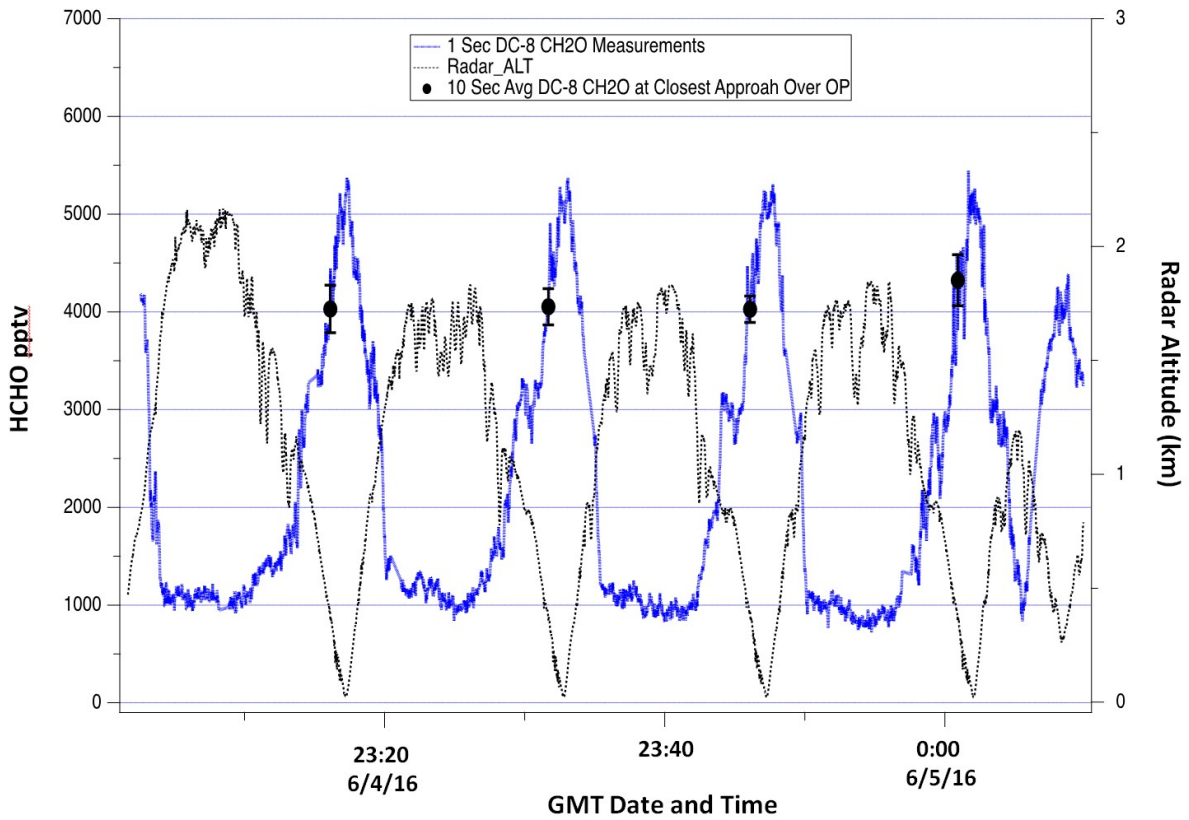

Fig. 15 DC-8 HCHO measurements over Olympic Park on June 4. The continuous blue profiles show the 1-second HCHO data while the black points with error bars show the 10-second average and standard deviation of this data at points of closest approach above the Olympic Park site.

950

951 **F15**

952

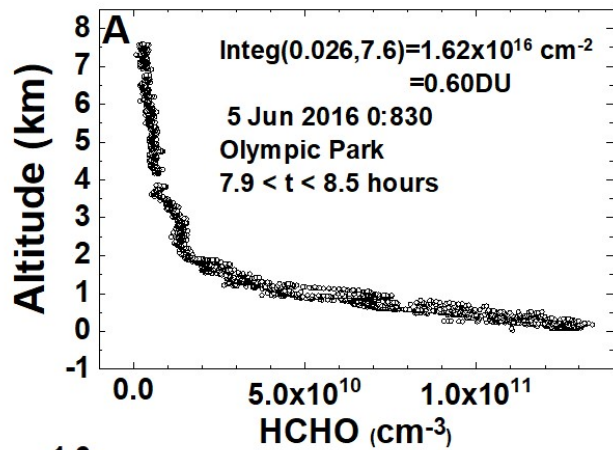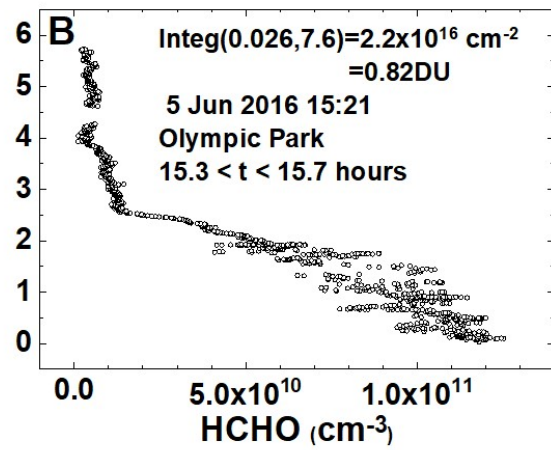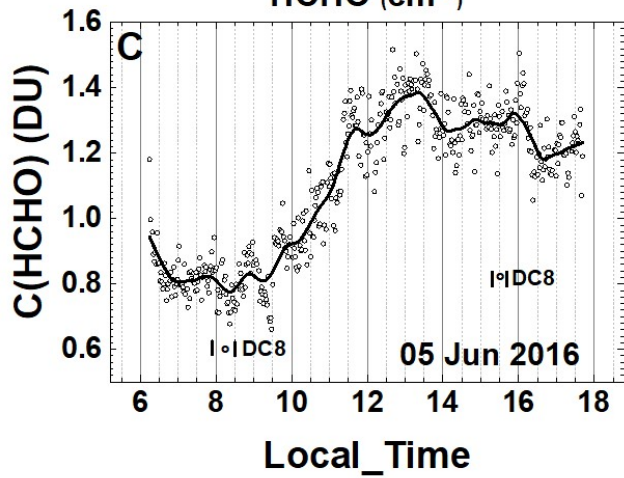

Fig. 16 HCHO altitude profile measured onboard the DC8 on 5 June at 8:30 (A) and 15:21 (B) local time over Olympic Park, Korea. Panel C: PSI measurements of total column HCHO. Vertical bars mark the DC8 flight duration for the profiles yielding column amounts of 0.60 and 0.82 DU.

953

954 **F16**

955

956

957

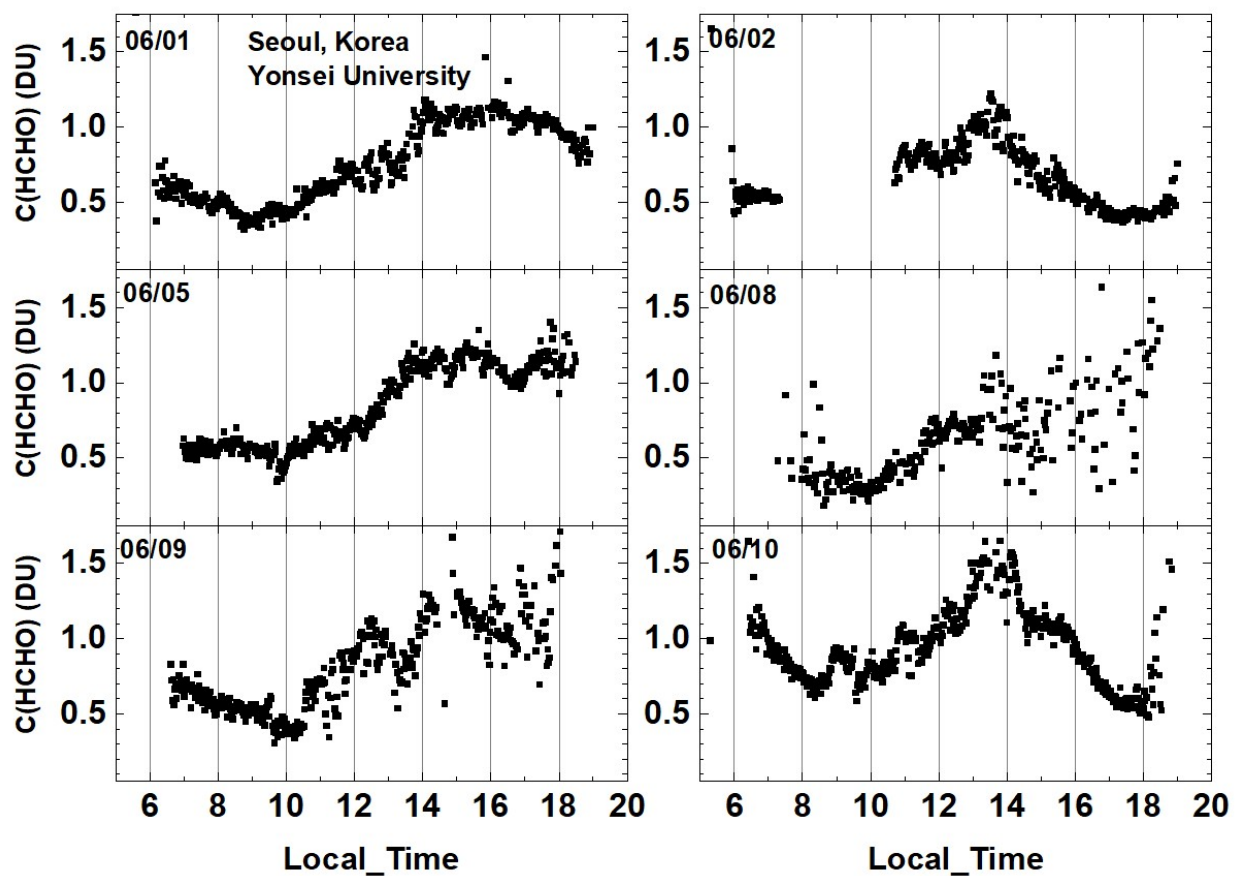

Fig. 17 Total column HCHO from Pandora Yonsei University, Seoul for 6 days in June 2016. C(HCHO) on 2 June 2016 has a peak value of 1.2 DU at 13:30 hours.

958

959 **F17**

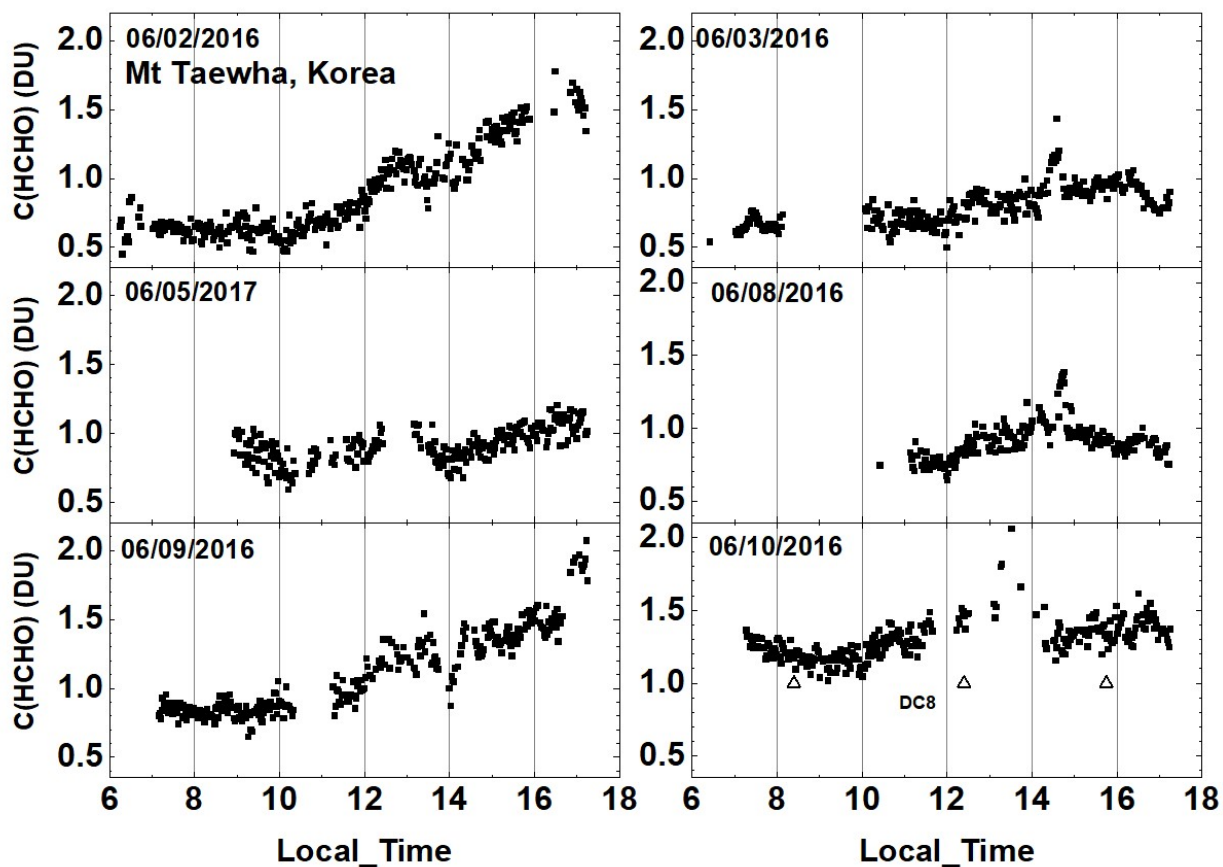

Fig. 18 Total column HCHO from Pandora at Taehwa Mountain for 6 days in June 2016. C(HCHO) on 2 June 2016 has a peak value of 1.7 DU at 16:20. △ are DC8 measurements on 10 June

960

961 **F18**

962

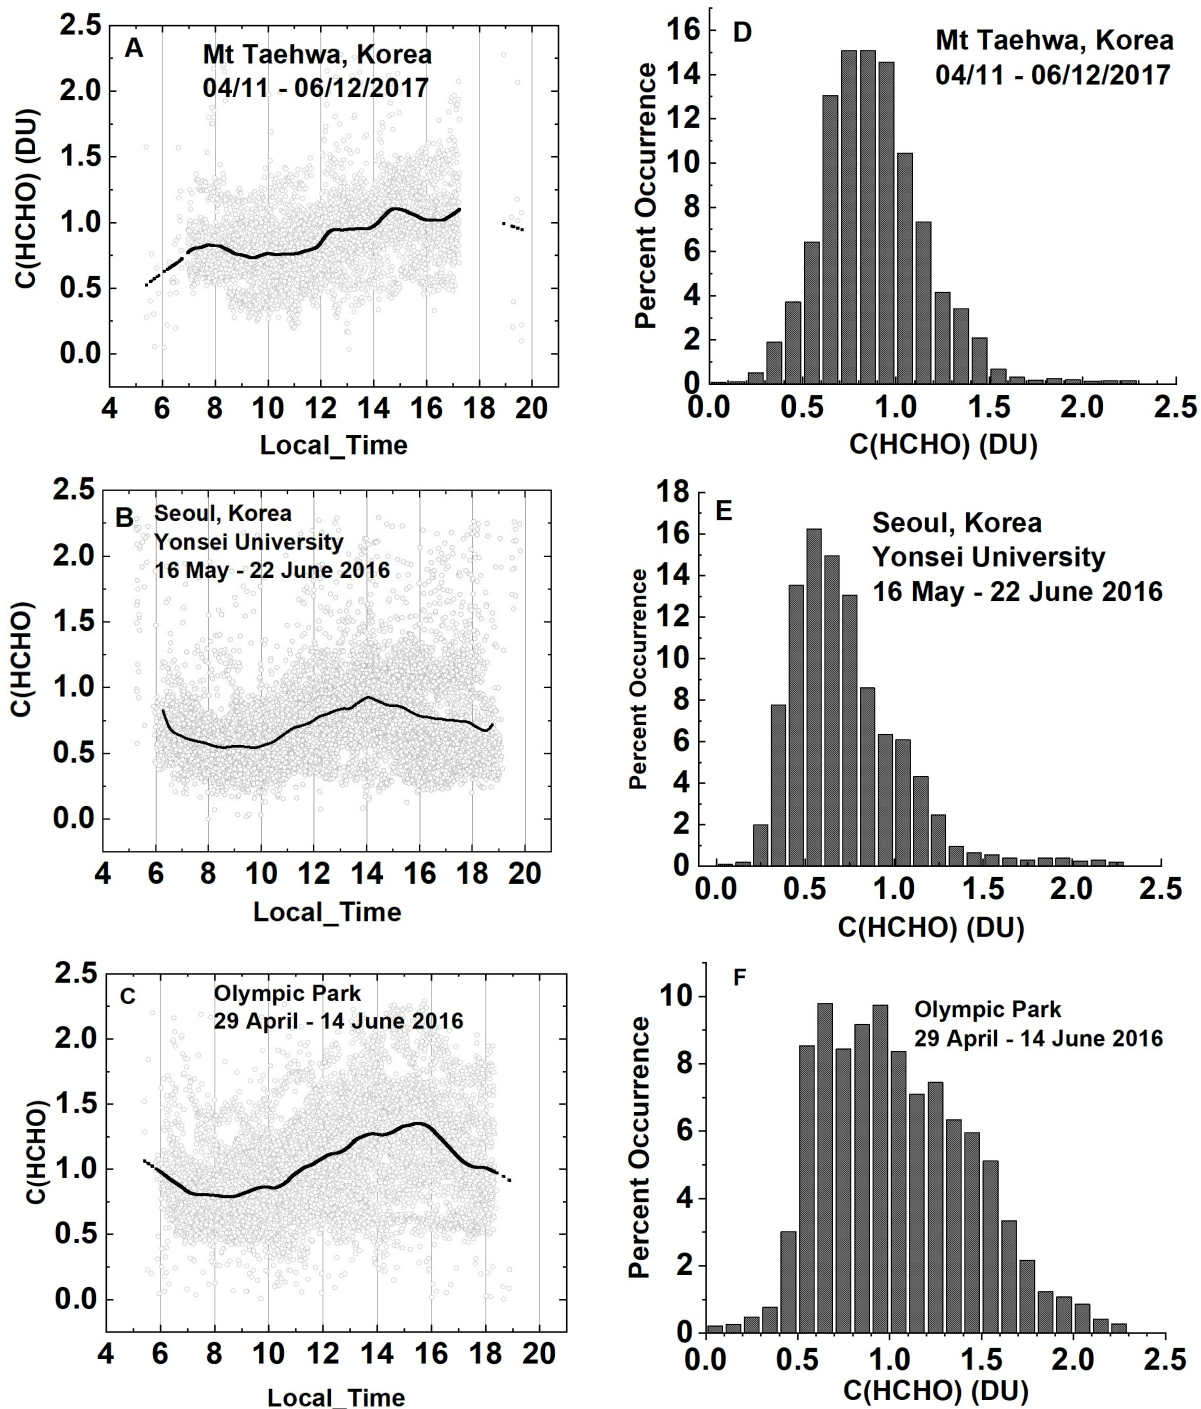

Fig. 19a Summary of total column HCHO for the stated dates during the KORUS-AQ campaign. The solid line is a Lowess(0.1) fit to the data. The sharp cutoffs in panel A, B, and C were caused by obstructions of the direct sun from the PSI FOV in the afternoon.

963

964 **F19a**

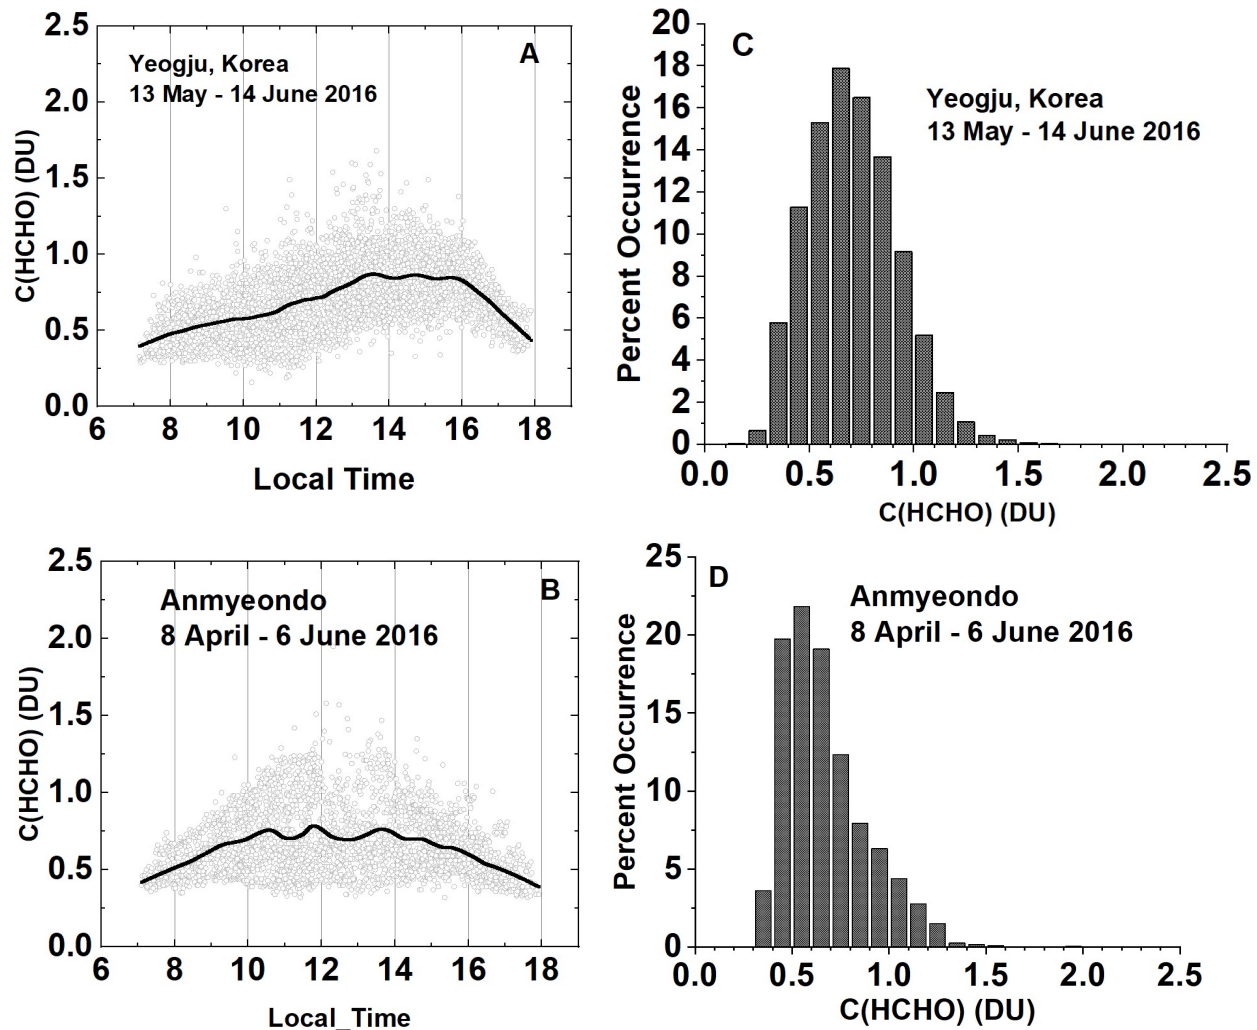

Fig. 19b Summary of total column HCHO for the stated dates during the KORUS-AQ campaign. Panels A and B represent the daily variation at a given local time. The solid line is a Lowess(0.1) fit to the data. Panels C and D show the frequency of occurrence (%) for different amounts of HCHO.

965

966

967 **F19b**

968

969

970

971

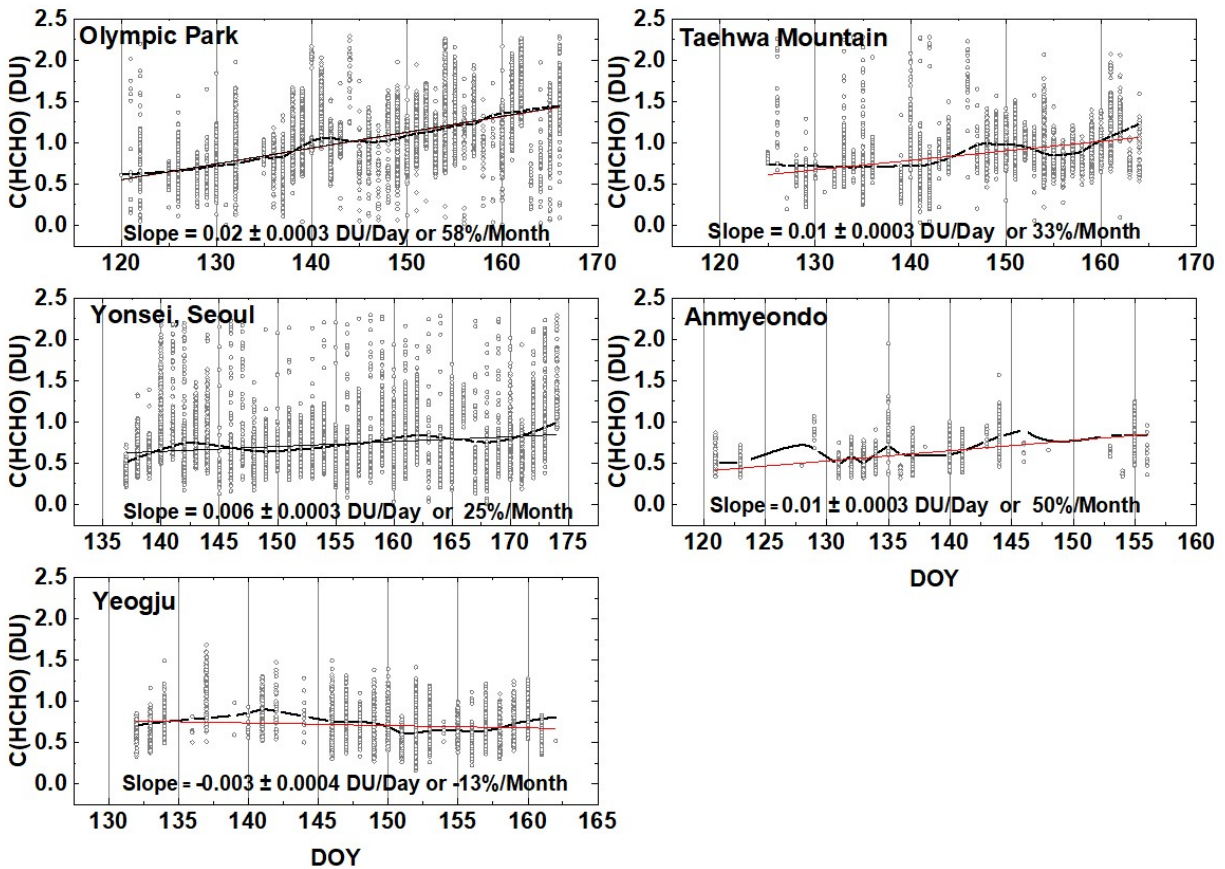

Fig. 20 The springtime change in C(HCHO) over about a 40 day period depending on the site. The “vertical bars” are the diurnal variation within each day of data. The thicker red curve is a Lowess(0.3) fit to the data, while the thin red line is a linear least squares fit. The Lowess(0.3) fit is approximately a 10-day local least-squares average.

972

973 **F20**

974

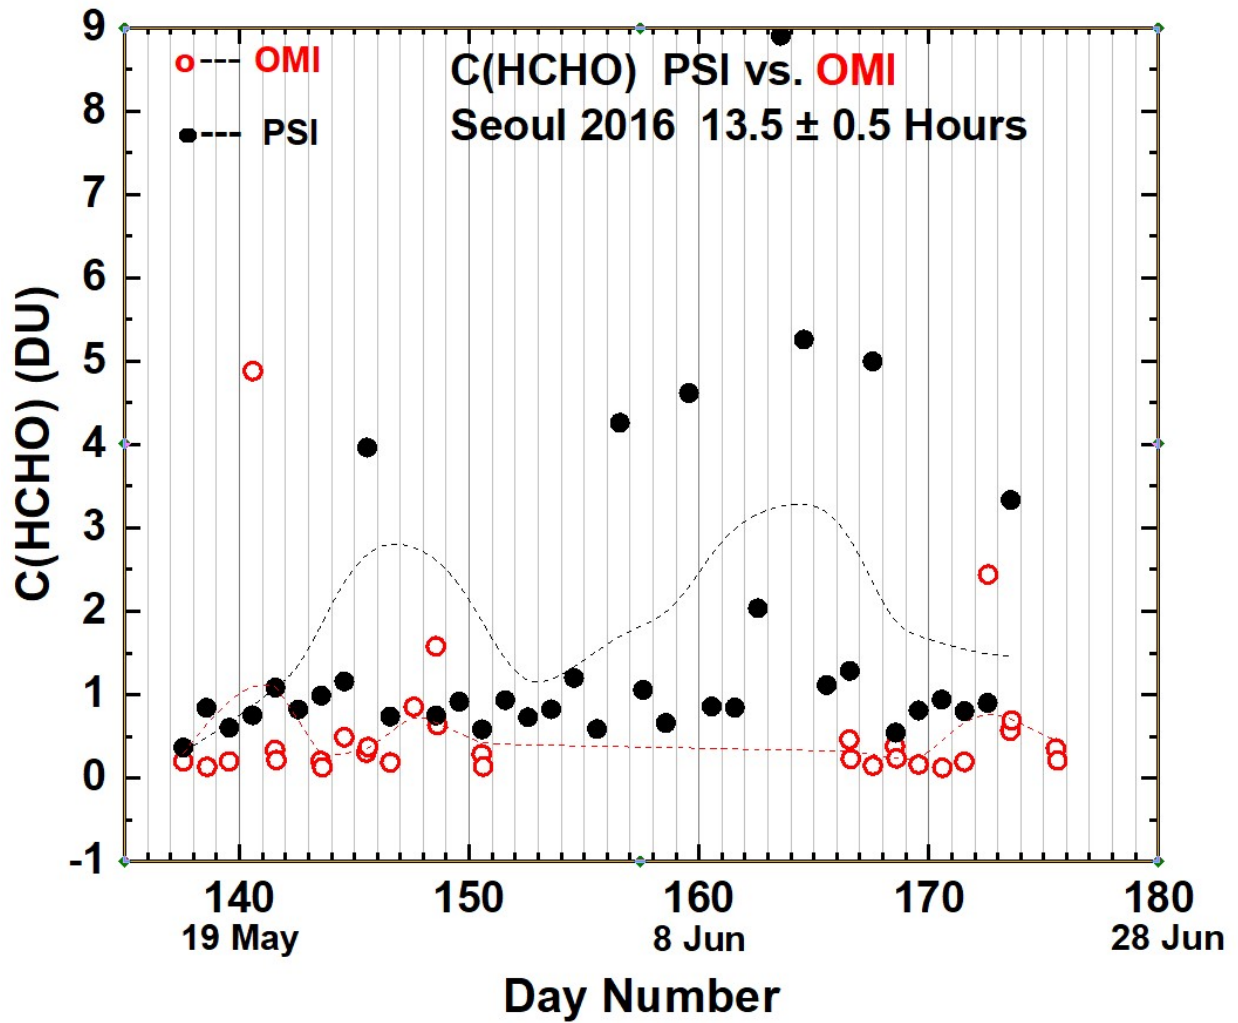

Fig. 21 Compare PSI • and OMI ◯ retrievals of C(HCHO) at  $13.5 \pm 0.5$  hours. OMI overpass data, V03, are from <https://avdc.gsfc.nasa.gov/index.php?site=1113974256&id=81>

975

976 **F21**

977



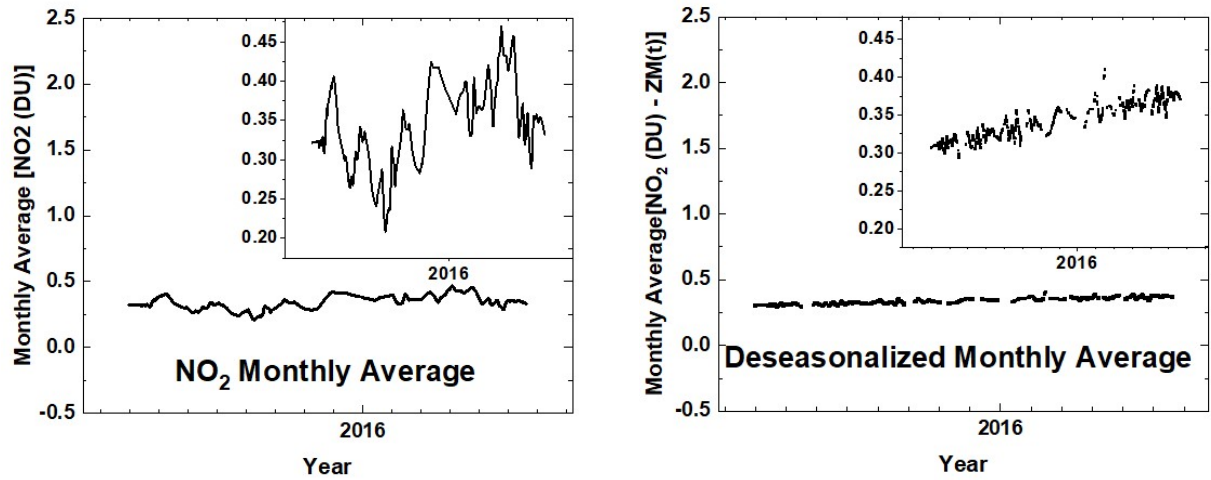

Fig. A1 An illustration of the deseasonalization (right panel) of the monthly running average of NO<sub>2</sub> (left panel) shown in Fig. 6. The insets are magnifications of the main plots.

978

979

980 **FA1**
